# Supplementary material for: An Ensemble Strategy to Predict Prognosis in Ovarian Cancer Based on Gene Modules
Source: Front Genet. 2019 Apr 24;10:366. doi: 10.3389/fgene.2019.00366 (PMC6491874; doi:10.3389/fgene.2019.00366)
Supplement: Supplementary file 1 [file Table_1.XLSX]

## Sheet: Sheet1
The co-expression network of Subtype_1
GeneId A	GeneId B	Correlation	P-value
2	5858	0.806708	5.82668e-60
2	7533	0.451684	2.83513e-14
2	1230	0.4319	4.6714e-13
2	4478	0.431751	4.76794e-13
9	29883	0.597293	3.83145e-26
9	5520	0.535893	1.96891e-20
9	427	0.518273	5.33566e-19
9	63898	0.513326	1.30244e-18
10	9	0.446848	5.71903e-14
10	27010	0.309782	4.25433e-07
10	8644	0.307102	5.40902e-07
10	7851	0.292257	1.96007e-06
12	1117	0.450528	3.35601e-14
12	3854	0.442424	1.07645e-13
12	3853	0.400131	2.91752e-11
12	5004	0.38177	2.62593e-10
13	51704	0.349409	9.17625e-09
13	59272	0.333087	4.76086e-08
13	55285	0.308673	4.70009e-07
13	3485	0.307321	5.30436e-07
14	64320	0.67471	2.32613e-35
14	79137	0.64737	8.46494e-32
14	23549	0.570158	1.79734e-23
14	58190	0.485359	1.55366e-16
15	3891	0.828551	6.34917e-66
15	6123	0.820323	1.39251e-63
15	9283	0.766885	7.7637e-51
15	4342	0.7314	4.04069e-44
16	55697	0.578043	3.19101e-24
16	25839	0.551733	8.56139e-22
16	9785	0.512505	1.50829e-18
16	23644	0.503388	7.49125e-18
18	2903	0.405096	1.57295e-11
18	25880	0.326708	8.83161e-08
18	54714	0.325302	1.01009e-07
18	10229	0.318028	2.00202e-07
19	23446	0.446357	6.13759e-14
19	9935	0.41607	3.87055e-12
19	22797	0.3997	3.07673e-11
19	10924	0.396933	4.31959e-11
20	26012	0.541427	6.70909e-21
20	29882	0.517138	6.55636e-19
20	9022	0.513615	1.23665e-18
20	727800	0.503529	7.31011e-18
21	1877	0.478973	4.36009e-16
21	5310	0.445202	7.24396e-14
21	8985	0.425793	1.07009e-12
21	9894	0.423656	1.42458e-12
22	1678	0.45398	2.02388e-14
22	1349	0.42113	1.99268e-12
22	3476	0.399861	3.01609e-11
22	54974	0.36868	1.15952e-09
23	8449	0.734461	1.17472e-44
23	6499	0.650212	3.75419e-32
23	203068	0.627954	1.74942e-29
23	54535	0.625212	3.60411e-29
24	9411	0.386032	1.59583e-10
24	1410	0.370971	8.9837e-10
24	2731	0.356973	4.14165e-09
24	7051	0.350944	7.82166e-09
25	8021	0.630819	8.15718e-30
25	23511	0.621488	9.51015e-29
25	10868	0.594405	7.58178e-26
25	6837	0.572797	1.01307e-23
26	57338	0.394352	5.91194e-11
26	333	0.392601	7.30283e-11
26	1896	0.389317	1.08177e-10
26	55365	0.388155	1.24192e-10
27	7175	0.610085	1.71362e-27
27	9887	0.531183	4.84719e-20
27	54856	0.526263	1.22388e-19
27	55718	0.49194	5.24428e-17
28	4736	0.582134	1.27759e-24
28	619499	0.487333	1.12434e-16
28	7178	0.485098	1.62131e-16
28	689	0.455041	1.73026e-14
29	55160	0.464602	4.11532e-15
29	23102	0.422887	1.57826e-12
29	4005	0.420299	2.22374e-12
29	22898	0.413614	5.32069e-12
30	51368	0.478387	4.78767e-16
30	4615	0.476704	6.25811e-16
30	22937	0.463078	5.18989e-15
30	79443	0.453114	2.29887e-14
31	30837	0.632355	5.40214e-30
31	8396	0.512233	1.58329e-18
31	11056	0.498538	1.7235e-17
31	51701	0.479438	4.04728e-16
32	6311	0.443498	9.23989e-14
32	79039	0.42585	1.06197e-12
32	5426	0.415856	3.97953e-12
32	57634	0.415005	4.44447e-12
33	81578	0.368944	1.12606e-09
33	4139	0.368696	1.15746e-09
33	6476	0.347498	1.1182e-08
33	80816	0.344248	1.56028e-08
34	23032	0.634324	3.17328e-30
34	10434	0.593149	1.01803e-25
34	11080	0.590381	1.93977e-25
34	830	0.587705	3.59693e-25
35	5025	0.464582	4.12783e-15
35	80024	0.422914	1.5726e-12
35	84934	0.41821	2.92672e-12
35	51329	0.403422	1.93925e-11
36	64376	0.566387	4.04214e-23
36	4942	0.523134	2.18843e-19
36	56647	0.519537	4.23761e-19
36	10539	0.484691	1.73255e-16
37	4641	0.572893	9.9207e-24
37	1856	0.565067	5.35513e-23
37	57048	0.543512	4.44857e-21
37	9905	0.51137	1.84626e-18
38	5962	0.690382	1.40351e-37
38	6392	0.595738	5.53798e-26
38	2230	0.578217	3.0704e-24
38	60496	0.562493	9.23461e-23
43	27022	0.444083	8.50077e-14
43	79748	0.438196	1.95323e-13
43	22953	0.437672	2.10155e-13
43	26531	0.427222	8.82742e-13
47	1659	0.54964	1.30792e-21
47	10197	0.524029	1.85469e-19
47	6605	0.510159	2.28865e-18
47	7266	0.496815	2.31009e-17
48	9373	0.442524	1.06122e-13
48	7415	0.390735	9.13474e-11
48	10497	0.386621	1.48875e-10
48	10210	0.377428	4.32901e-10
49	2990	0.352059	6.96095e-09
49	9726	0.349694	8.90849e-09
49	1387	0.329656	6.6494e-08
49	29123	0.327126	8.48528e-08
51	5718	0.571149	1.45007e-23
51	51081	0.542769	5.1514e-21
51	5635	0.520005	3.89054e-19
51	57003	0.515459	8.8795e-19
52	10971	0.601139	1.52746e-26
52	55256	0.561321	1.18147e-22
52	1876	0.556743	3.06614e-22
52	9014	0.536354	1.80147e-20
53	4141	0.584111	8.17054e-25
53	6199	0.572207	1.15221e-23
53	5905	0.538152	1.2719e-20
53	369	0.537755	1.37366e-20
54	1043	0.501255	1.0824e-17
54	4318	0.481438	2.93504e-16
54	6352	0.458311	1.06408e-14
54	919	0.435593	2.80712e-13
55	5337	0.397852	3.86052e-11
55	23317	0.351381	7.47235e-09
55	25852	0.33538	3.79918e-08
55	79832	0.334807	4.02037e-08
56	10841	0.340359	2.31328e-08
56	2695	0.322829	1.27716e-07
56	3083	0.315387	2.55506e-07
56	11280	0.314177	2.85469e-07
58	70	0.52412	1.82335e-19
58	6876	0.517425	6.22456e-19
58	57158	0.492158	5.05679e-17
58	9260	0.444854	7.61381e-14
59	6876	0.64807	6.93507e-32
59	1277	0.643028	2.88356e-31
59	72	0.641043	5.01675e-31
59	25802	0.634784	2.80097e-30
70	8328	0.59445	7.50227e-26
70	6663	0.560433	1.42313e-22
70	3697	0.543665	4.31632e-21
70	8506	0.541276	6.9106e-21
71	9775	0.481177	3.06106e-16
71	396	0.458391	1.05144e-14
71	5034	0.454423	1.89574e-14
71	55666	0.425009	1.18877e-12
72	5350	0.650299	3.66129e-32
72	59	0.641043	5.01675e-31
72	1264	0.596559	4.56038e-26
72	25802	0.591999	1.33158e-25
81	55095	0.747762	4.45807e-47
81	54623	0.698715	8.10121e-39
81	6829	0.691749	8.84796e-38
81	4793	0.631017	7.73774e-30
86	51193	0.726863	2.44477e-43
86	5984	0.686061	5.93122e-37
86	55669	0.678417	7.14613e-36
86	4711	0.674855	2.22214e-35
87	89	0.697505	1.23305e-38
87	26037	0.58322	9.99877e-25
87	22990	0.506731	4.1855e-18
87	9766	0.493442	4.07889e-17
88	10814	0.360553	2.82141e-09
88	10761	0.357251	4.02073e-09
88	6865	0.349924	8.69831e-09
88	640	0.33884	2.69361e-08
89	87	0.697505	1.23305e-38
89	1743	0.483767	2.01343e-16
89	2342	0.4749	8.32655e-16
89	5663	0.423517	1.45115e-12
90	4780	0.524733	1.62755e-19
90	79568	0.507082	3.93569e-18
90	10213	0.4852	1.59452e-16
90	1385	0.474758	8.51452e-16
91	51289	0.764117	2.85947e-50
91	5030	0.750392	1.42058e-47
91	5309	0.748724	2.93971e-47
91	340351	0.725383	4.36301e-43
92	10477	0.477978	5.1104e-16
92	10254	0.475137	8.0202e-16
92	55754	0.465645	3.50907e-15
92	10096	0.447575	5.15017e-14
93	4820	0.648846	5.55563e-32
93	9943	0.615076	4.90353e-28
93	23524	0.553571	5.88498e-22
93	100302197	0.540781	7.61508e-21
94	5880	0.363024	2.15874e-09
94	5739	0.35921	3.2603e-09
94	920	0.355563	4.81162e-09
94	3779	0.349022	9.55246e-09
95	9136	0.699358	6.47249e-39
95	6159	0.632822	4.76298e-30
95	25864	0.613326	7.62428e-28
95	327	0.581332	1.5303e-24
97	58517	0.480469	3.43025e-16
97	2079	0.431643	4.8389e-13
97	2796	0.420331	2.21452e-12
97	55120	0.412755	5.94321e-12
98	79833	0.539865	9.10938e-21
98	112869	0.5279	9.00861e-20
98	51374	0.436373	2.51867e-13
98	54344	0.433996	3.50131e-13
100	4939	0.379231	3.52062e-10
100	6789	0.362304	2.33431e-09
100	51006	0.361504	2.5458e-09
100	25939	0.347977	1.06425e-08
101	3689	0.583956	8.46342e-25
101	3684	0.575329	5.81613e-24
101	7805	0.556652	3.12417e-22
101	3055	0.54198	6.01736e-21
102	10116	0.666112	3.36668e-34
102	29766	0.556886	2.97635e-22
102	9325	0.52157	2.91979e-19
102	9101	0.510555	2.13369e-18
103	6772	0.578386	2.95681e-24
103	81030	0.573988	7.80803e-24
103	4939	0.554908	4.47488e-22
103	54809	0.499222	1.53374e-17
104	5116	0.537177	1.53647e-20
104	23076	0.534839	2.4116e-20
104	54014	0.499251	1.52617e-17
104	7307	0.479572	3.96108e-16
105	2184	0.361452	2.5603e-09
105	5121	0.341437	2.07505e-08
105	54768	0.33959	2.49879e-08
105	64446	0.336282	3.47497e-08
107	5453	0.774632	1.83186e-52
107	3697	0.765789	1.30349e-50
107	6559	0.755932	1.21799e-48
107	24146	0.740749	8.79031e-46
108	1392	0.467831	2.50793e-15
108	5625	0.435971	2.66348e-13
108	6707	0.430011	6.04772e-13
108	6703	0.420088	2.28664e-12
109	23620	0.404064	1.78991e-11
109	8648	0.371597	8.3759e-10
109	79056	0.364701	1.79762e-09
109	50618	0.345835	1.32665e-08
112	784	0.387922	1.27666e-10
112	22937	0.386872	1.44542e-10
112	54884	0.386379	1.532e-10
112	5754	0.385115	1.7774e-10
113	51411	0.462998	5.25264e-15
113	2313	0.438814	1.79111e-13
113	23136	0.436497	2.47588e-13
113	79895	0.430733	5.48051e-13
114	154796	0.47148	1.42393e-15
114	367	0.439017	1.74079e-13
114	5420	0.437761	2.07555e-13
114	366	0.428206	7.72808e-13
115	8312	0.454119	1.9827e-14
115	3163	0.43223	4.4648e-13
115	5310	0.428926	7.00904e-13
115	10131	0.422521	1.65697e-12
116	79628	0.390358	9.55523e-11
116	57597	0.360727	2.76893e-09
116	1124	0.311337	3.69698e-07
116	64377	0.307924	5.0262e-07
117	5241	0.405322	1.52883e-11
117	5016	0.386304	1.54547e-10
117	4902	0.372528	7.54503e-10
117	250	0.360859	2.72978e-09
118	6002	0.676852	1.17864e-35
118	6047	0.655335	8.48048e-33
118	100126332	0.641104	4.9322e-31
118	2580	0.631055	7.65819e-30
119	333	0.432079	4.5583e-13
119	55506	0.37358	6.70186e-10
119	100302263	0.361773	2.47283e-09
119	2662	0.354631	5.31044e-09
120	10285	0.520756	3.39086e-19
120	8036	0.461486	6.60405e-15
120	51474	0.409352	9.18718e-12
120	3685	0.397031	4.26855e-11
124	125	0.893587	2.46139e-90
124	2167	0.577575	3.54055e-24
124	1149	0.485362	1.55276e-16
124	8639	0.423701	1.41592e-12
125	124	0.893587	2.46139e-90
125	2167	0.710372	1.26535e-40
125	1149	0.58739	3.86704e-25
125	9370	0.54722	2.12728e-21
128	23173	0.740989	7.95145e-46
128	1977	0.636763	1.63289e-30
128	57117	0.630366	9.20777e-30
128	51138	0.624011	4.93557e-29
130	3361	0.469107	2.059e-15
130	51555	0.456185	1.46058e-14
130	319	0.447191	5.44343e-14
130	1244	0.445315	7.12731e-14
131	56287	0.493891	3.78323e-17
131	1392	0.447881	4.92792e-14
131	3713	0.441471	1.23206e-13
131	23415	0.429183	6.76861e-13
132	7417	0.541269	6.91957e-21
132	310	0.508707	2.95772e-18
132	8802	0.42292	1.57142e-12
132	8509	0.419553	2.45355e-12
133	51129	0.623485	5.66177e-29
133	7422	0.575614	5.46201e-24
133	6515	0.544154	3.91804e-21
133	54541	0.517787	5.82805e-19
134	5834	0.389772	1.0247e-10
134	10882	0.381609	2.67526e-10
134	3761	0.361263	2.61303e-09
134	6470	0.343385	1.70352e-08
135	916	0.762345	6.52527e-50
135	23046	0.759206	2.7655e-49
135	6663	0.724954	5.15867e-43
135	64837	0.71857	5.98798e-42
140	4481	0.749839	1.80902e-47
140	8477	0.677802	8.70212e-36
140	54209	0.670911	7.6609e-35
140	719	0.666526	2.96614e-34
141	4481	0.532096	4.07489e-20
141	80231	0.506866	4.08751e-18
141	728	0.503524	7.31657e-18
141	8832	0.486747	1.23802e-16
142	4931	0.644931	1.68913e-31
142	79169	0.603582	8.46291e-27
142	1063	0.577722	3.42685e-24
142	7159	0.570911	1.52721e-23
143	10284	0.553085	6.4996e-22
143	55835	0.519512	4.25748e-19
143	2971	0.492921	4.45079e-17
143	6541	0.491623	5.52835e-17
146	6369	0.637638	1.28487e-30
146	79748	0.621706	8.98835e-29
146	64837	0.602908	9.96545e-27
146	10045	0.601543	1.38606e-26
147	2878	0.393871	6.26607e-11
147	57804	0.36194	2.42854e-09
147	5155	0.353958	5.70171e-09
147	6376	0.346367	1.2562e-08
148	10178	0.347179	1.15564e-08
148	54860	0.331986	5.30177e-08
148	1394	0.316308	2.34735e-07
148	2853	0.314606	2.74472e-07
150	3667	0.411139	7.31318e-12
150	5654	0.410341	8.09923e-12
150	10602	0.38784	1.28917e-10
150	10267	0.381098	2.83848e-10
151	23468	0.32813	7.7044e-08
151	1329	0.312931	3.1987e-07
151	11247	0.311021	3.80433e-07
151	129080	0.307489	5.22567e-07
152	10411	0.387483	1.34474e-10
152	2049	0.385194	1.76099e-10
152	55061	0.381141	2.82425e-10
152	1382	0.356213	4.49067e-09
153	11181	0.597127	3.98594e-26
153	732	0.594504	7.4075e-26
153	2658	0.590255	1.99749e-25
153	7480	0.587823	3.50124e-25
154	9459	0.469126	2.053e-15
154	79628	0.458255	1.07301e-14
154	397	0.457174	1.26078e-14
154	5294	0.455773	1.55272e-14
155	9283	0.693046	5.69805e-38
155	15	0.668598	1.56888e-34
155	94027	0.658328	3.50741e-33
155	6123	0.656466	6.08162e-33
156	55262	0.52032	3.67239e-19
156	433	0.499173	1.54666e-17
156	2516	0.494108	3.64798e-17
156	9421	0.48872	8.94733e-17
157	6634	0.393805	6.31618e-11
157	23636	0.37375	6.57443e-10
157	6614	0.368912	1.1301e-09
157	6774	0.357926	3.74123e-09
158	10478	0.639143	8.491e-31
158	6767	0.634868	2.73761e-30
158	4733	0.566744	3.74549e-23
158	56993	0.565403	4.98551e-23
159	9804	0.654561	1.06363e-32
159	64216	0.625852	3.04667e-29
159	51742	0.619832	1.45796e-28
159	23029	0.5714	1.37338e-23
161	6888	0.654546	1.06832e-32
161	64787	0.597975	3.25771e-26
161	6150	0.582943	1.06437e-24
161	6050	0.58166	1.42169e-24
162	2130	0.557522	2.6092e-22
162	6598	0.535137	2.27758e-20
162	53	0.531803	4.3091e-20
162	8508	0.512895	1.4068e-18
163	147179	0.500381	1.25766e-17
163	10197	0.446282	6.20431e-14
163	22794	0.442129	1.12244e-13
163	31	0.438567	1.85432e-13
164	5713	0.621091	1.05366e-28
164	2734	0.604148	7.37456e-27
164	10664	0.560332	1.45371e-22
164	865	0.556333	3.33712e-22
165	1277	0.758515	3.78851e-49
165	1289	0.739215	1.66625e-45
165	1290	0.716454	1.32997e-41
165	1293	0.71565	1.79707e-41
166	2767	0.522829	2.31531e-19
166	6449	0.52067	3.4443e-19
166	10362	0.488433	9.38095e-17
166	113178	0.485816	1.44186e-16
167	433	0.358258	3.61059e-09
167	83942	0.341056	2.15635e-08
167	5582	0.324628	1.07704e-07
167	336	0.322856	1.27398e-07
173	9086	0.483528	2.09289e-16
173	3827	0.460653	7.48823e-15
173	7404	0.446204	6.27467e-14
173	51555	0.438636	1.83648e-13
174	2266	0.687808	3.32112e-37
174	6005	0.687551	3.61875e-37
174	7018	0.647605	7.91799e-32
174	8431	0.633839	3.61826e-30
175	60559	0.521363	3.03334e-19
175	1635	0.485433	1.53494e-16
175	84869	0.463443	4.90977e-15
175	100289097	0.442165	1.11665e-13
176	50509	0.593749	8.84451e-26
176	57124	0.579846	2.13512e-24
176	8038	0.527118	1.04304e-19
176	54829	0.499236	1.52997e-17
177	8620	0.601693	1.33675e-26
177	1506	0.588181	3.22457e-25
177	3083	0.587997	3.36356e-25
177	283870	0.580397	1.88752e-24
178	1629	0.62914	1.27682e-29
178	54482	0.526832	1.1005e-19
178	6814	0.525747	1.3475e-19
178	8634	0.519994	3.89866e-19
181	7143	0.358478	3.5266e-09
181	2219	0.351563	7.33181e-09
181	10871	0.320721	1.55735e-07
181	4975	0.313642	2.99793e-07
182	3280	0.391238	8.6007e-11
182	259230	0.358842	3.39165e-09
182	4217	0.332773	4.90969e-08
182	55304	0.332589	4.9988e-08
183	27147	0.383066	2.25841e-10
183	1141	0.370103	9.89796e-10
183	4784	0.359388	3.19851e-09
183	2786	0.35839	3.55981e-09
185	1634	0.462154	5.97014e-15
185	4969	0.438835	1.78589e-13
185	79987	0.412417	6.20765e-12
185	2825	0.407564	1.15262e-11
186	6317	0.386772	1.46248e-10
186	6318	0.351993	7.00898e-09
186	1087	0.347679	1.09758e-08
186	5968	0.286105	3.27295e-06
189	5453	0.620621	1.18961e-28
189	916	0.613489	7.31747e-28
189	51555	0.610919	1.3924e-27
189	6559	0.607725	3.07232e-27
190	2262	0.352566	6.60046e-09
190	2171	0.32107	1.5072e-07
190	10656	0.319211	1.79342e-07
190	22987	0.307457	5.24063e-07
191	51654	0.52078	3.37541e-19
191	55741	0.492728	4.59696e-17
191	51614	0.470094	1.76687e-15
191	8904	0.446888	5.68661e-14
196	23161	0.46587	3.38981e-15
196	221830	0.411029	7.41698e-12
196	54664	0.404984	1.59511e-11
196	79778	0.389508	1.05746e-10
197	3050	0.773665	2.94837e-52
197	259	0.721548	1.92412e-42
197	7031	0.707379	3.75406e-40
197	3046	0.689231	2.06522e-37
199	1536	0.911382	6.39321e-100
199	963	0.899109	4.07582e-93
199	3937	0.885017	2.6146e-86
199	945	0.882574	3.20886e-85
202	10973	0.4323	4.42187e-13
202	2309	0.424704	1.23829e-12
202	147179	0.404559	1.68233e-11
202	2891	0.386885	1.44322e-10
203	51117	0.542905	5.01509e-21
203	22845	0.51168	1.74698e-18
203	2021	0.494909	3.18785e-17
203	8818	0.477932	5.14818e-16
204	8668	0.598893	2.61718e-26
204	64766	0.545686	2.88989e-21
204	5928	0.512707	1.45474e-18
204	3065	0.478284	4.86686e-16
207	4140	0.713562	3.9106e-41
207	23241	0.697898	1.07584e-38
207	9529	0.623835	5.16714e-29
207	3831	0.606478	4.17414e-27
208	112398	0.57121	1.43111e-23
208	79934	0.546499	2.45706e-21
208	55095	0.530225	5.81179e-20
208	5704	0.499665	1.42196e-17
210	81932	0.564697	5.7932e-23
210	54836	0.532554	3.73438e-20
210	5774	0.519089	4.59894e-19
210	9550	0.473373	1.05873e-15
211	11344	0.596316	4.82995e-26
211	8314	0.523648	1.99017e-19
211	10869	0.463178	5.11159e-15
211	375346	0.426749	9.40956e-13
212	3053	0.779449	1.65263e-53
212	336	0.748317	3.50678e-47
212	4990	0.729571	8.38541e-44
212	58510	0.712658	5.46355e-41
213	350	0.688088	3.02539e-37
213	1081	0.615556	4.34346e-28
213	174	0.607783	3.02878e-27
213	2266	0.593178	1.01114e-25
214	23228	0.39611	4.7758e-11
214	4254	0.369645	1.04162e-09
214	4780	0.34501	1.44365e-08
214	2770	0.339403	2.54603e-08
215	2664	0.615406	4.51138e-28
215	9130	0.603486	8.66204e-27
215	6901	0.591924	1.35514e-25
215	8517	0.584186	8.03361e-25
216	7103	0.467842	2.50373e-15
216	79825	0.450488	3.37592e-14
216	6943	0.449213	4.06371e-14
216	730	0.449101	4.12978e-14
217	4781	0.403551	1.90835e-11
217	1112	0.389682	1.03579e-10
217	51347	0.375281	5.52858e-10
217	5037	0.372908	7.2292e-10
218	7139	0.454151	1.97351e-14
218	79148	0.447283	5.37158e-14
218	9022	0.384303	1.95475e-10
218	224	0.371342	8.61906e-10
219	9380	0.504089	6.63335e-18
219	30968	0.501208	1.09127e-17
219	64425	0.46416	4.4019e-15
219	10488	0.463357	4.97424e-15
220	4837	0.393257	6.74753e-11
220	7058	0.356733	4.24909e-09
220	12	0.345584	1.36126e-08
220	1462	0.333768	4.45336e-08
222	55040	0.424153	1.33308e-12
222	79755	0.400409	2.81896e-11
222	9545	0.379381	3.46061e-10
222	376267	0.364567	1.82434e-09
223	11266	0.397187	4.18768e-11
223	26092	0.386601	1.49236e-10
223	51430	0.375109	5.6372e-10
223	1314	0.370829	9.12786e-10
224	23326	0.513885	1.17843e-18
224	11216	0.511313	1.86496e-18
224	57336	0.485421	1.53783e-16
224	6470	0.460802	7.32216e-15
225	54900	0.527332	1.00206e-19
225	3702	0.511181	1.90926e-18
225	4063	0.504176	6.53449e-18
225	399	0.480841	3.2308e-16
226	9810	0.580619	1.79603e-24
226	4150	0.5731	9.48286e-24
226	5595	0.570778	1.57185e-23
226	10295	0.563652	7.22961e-23
229	337	0.549792	1.26851e-21
229	7380	0.540329	8.31993e-21
229	25763	0.538569	1.17278e-20
229	8858	0.524809	1.60461e-19
230	6830	0.468722	2.18565e-15
230	56413	0.438712	1.817e-13
230	9094	0.429457	6.52111e-13
230	2319	0.42934	6.62554e-13
231	65244	0.467307	2.71883e-15
231	1466	0.377053	4.51876e-10
231	54821	0.35931	3.22534e-09
231	1690	0.359112	3.29488e-09
238	7042	0.366903	1.41138e-09
238	2043	0.360038	2.98262e-09
238	10446	0.317016	2.1987e-07
238	2891	0.308153	4.92446e-07
239	11184	0.352739	6.48158e-09
239	64763	0.345431	1.3827e-08
239	6829	0.331496	5.56169e-08
239	79935	0.313063	3.16046e-07
240	397	0.451784	2.79395e-14
240	5880	0.446976	5.61501e-14
240	5724	0.443699	8.97913e-14
240	54518	0.433817	3.58923e-13
241	719	0.80451	2.10398e-59
241	2213	0.782857	2.90372e-54
241	963	0.773403	3.35229e-52
241	3676	0.770473	1.3943e-51
242	2161	0.396921	4.3263e-11
242	79777	0.380459	3.0562e-10
242	6844	0.372847	7.27909e-10
242	59344	0.365569	1.63448e-09
246	51206	0.497517	2.05067e-17
246	6677	0.494932	3.17555e-17
246	5672	0.485637	1.48474e-16
246	5798	0.48261	2.42877e-16
247	923	0.391525	8.31007e-11
247	586	0.37604	5.07166e-10
247	51314	0.355136	5.0343e-09
247	2118	0.344667	1.49504e-08
248	5453	0.59728	3.84307e-26
248	64837	0.592624	1.15098e-25
248	3697	0.580519	1.8365e-24
248	9293	0.574194	7.46313e-24
249	3680	0.375793	5.21642e-10
249	51700	0.374041	6.36182e-10
249	2037	0.320647	1.5681e-07
249	89797	0.317486	2.10506e-07
250	251	0.67811	7.88629e-36
250	248	0.503676	7.12689e-18
250	5241	0.467546	2.62049e-15
250	9687	0.461376	6.71506e-15
251	250	0.67811	7.88629e-36
251	248	0.525339	1.45387e-19
251	5241	0.381585	2.68261e-10
251	9687	0.372798	7.31924e-10
257	4058	0.320256	1.62668e-07
257	9152	0.271208	1.07824e-05
257	26056	0.26378	1.90454e-05
257	5255	0.260832	2.37597e-05
258	9283	0.64695	9.5396e-32
258	50835	0.623793	5.22475e-29
258	94027	0.61461	5.51707e-28
258	3697	0.608465	2.55946e-27
259	3050	0.799456	3.79311e-58
259	197	0.721548	1.92412e-42
259	3046	0.69129	1.03349e-37
259	7031	0.683764	1.26325e-36
262	8763	0.60755	3.20735e-27
262	51362	0.545829	2.80888e-21
262	51389	0.496639	2.38027e-17
262	11231	0.483557	2.08309e-16
265	337	0.3494	9.18501e-09
265	2623	0.341754	2.0098e-08
265	3884	0.337598	3.04926e-08
265	1814	0.329373	6.83399e-08
266	7404	0.347742	1.09047e-08
266	4153	0.330022	6.41763e-08
266	7021	0.311667	3.58813e-07
266	80350	0.310771	3.89122e-07
267	10300	0.36442	1.85388e-09
267	79228	0.341748	2.01101e-08
267	55239	0.330163	6.33071e-08
267	79006	0.330116	6.35943e-08
268	2027	0.493696	3.90877e-17
268	6794	0.463362	4.97009e-15
268	5657	0.454807	1.79124e-14
268	5453	0.452965	2.3497e-14
269	1280	0.661115	1.52782e-33
269	5178	0.618768	1.91591e-28
269	2626	0.614501	5.67049e-28
269	114897	0.588851	2.76321e-25
270	608	0.842949	2.45482e-70
270	54900	0.838516	6.23165e-69
270	3662	0.796673	1.79939e-57
270	973	0.784815	1.05378e-54
271	1952	0.519962	3.92112e-19
271	4926	0.467033	2.83568e-15
271	26993	0.459839	8.46359e-15
271	478	0.446913	5.66593e-14
272	3684	0.469625	1.90035e-15
272	1318	0.468502	2.26127e-15
272	9839	0.44276	1.02617e-13
272	3937	0.440297	1.45411e-13
273	23209	0.425408	1.12691e-12
273	80122	0.415538	4.14773e-12
273	57535	0.408883	9.75189e-12
273	79864	0.399155	3.28993e-11
274	6549	0.413627	5.31155e-12
274	6539	0.402992	2.04609e-11
274	8416	0.39183	8.01128e-11
274	1410	0.366034	1.55307e-09
275	3931	0.451057	3.10697e-14
275	9223	0.42068	2.11476e-12
275	7536	0.41201	6.54064e-12
275	4485	0.406387	1.3372e-11
279	3680	0.305101	6.46109e-07
279	83988	0.302921	7.82992e-07
279	26018	0.302645	8.02154e-07
279	91746	0.294744	1.58768e-06
283	6038	0.769743	1.98299e-51
283	51310	0.38512	1.77641e-10
283	10687	0.3477	1.0952e-08
283	55503	0.337974	2.93702e-08
284	2044	0.445215	7.23029e-14
284	7404	0.423618	1.43175e-12
284	3827	0.418427	2.84467e-12
284	2243	0.414979	4.45964e-12
285	11082	0.622802	6.7622e-29
285	2321	0.597148	3.96569e-26
285	7422	0.519532	4.24187e-19
285	79839	0.494701	3.30158e-17
286	27092	0.463877	4.59596e-15
286	9914	0.450911	3.17393e-14
286	11343	0.431662	4.82664e-13
286	2775	0.408221	1.06062e-11
287	8708	0.461879	6.22336e-15
287	50939	0.417308	3.29362e-12
287	6660	0.382585	2.38852e-10
287	51066	0.363596	2.02822e-09
288	23086	0.545051	3.27893e-21
288	6584	0.427163	8.89852e-13
288	221037	0.412713	5.97554e-12
288	23576	0.410733	7.70322e-12
290	1553	0.386237	1.5578e-10
290	2052	0.366024	1.55492e-09
290	55154	0.354355	5.46725e-09
290	1613	0.341762	2.00803e-08
291	1635	0.561033	1.25515e-22
291	3622	0.541413	6.72797e-21
291	55602	0.536639	1.70499e-20
291	100289097	0.462212	5.91772e-15
292	7411	0.601172	1.51556e-26
292	9559	0.595077	6.47187e-26
292	63932	0.584671	7.19504e-25
292	10539	0.583984	8.40968e-25
301	302	0.433797	3.59868e-13
301	7039	0.397901	3.83774e-11
301	55312	0.382363	2.45105e-10
301	54981	0.368858	1.13688e-09
302	6281	0.553158	6.4032e-22
302	2012	0.463597	4.79572e-15
302	3853	0.436249	2.56248e-13
302	301	0.433797	3.59868e-13
306	53371	0.331518	5.54963e-08
306	80144	0.322047	1.37497e-07
306	9200	0.308558	4.74895e-07
306	4258	0.302283	8.28002e-07
307	79180	0.439863	1.54581e-13
307	25825	0.385253	1.74877e-10
307	6840	0.37786	4.12058e-10
307	130814	0.375953	5.12194e-10
308	5393	0.417466	3.22598e-12
308	9871	0.381428	2.73203e-10
308	55212	0.366138	1.53552e-09
308	3956	0.335749	3.6633e-08
309	23589	0.391479	8.35572e-11
309	7791	0.363538	2.04117e-09
309	57192	0.349191	9.38678e-09
309	81890	0.344489	1.52245e-08
310	56681	0.602143	1.19918e-26
310	11319	0.58965	2.29761e-25
310	818	0.531479	4.58275e-20
310	5532	0.50986	2.41301e-18
311	23286	0.538732	1.13611e-20
311	818	0.493047	4.35835e-17
311	7414	0.454157	1.97158e-14
311	9632	0.452978	2.34517e-14
312	10149	0.516268	7.67475e-19
312	154796	0.428958	6.97823e-13
312	114	0.425316	1.14086e-12
312	55351	0.407842	1.11274e-11
313	8477	0.815817	2.37453e-62
313	51284	0.804426	2.20999e-59
313	7099	0.802815	5.60308e-59
313	719	0.799978	2.82399e-58
314	7975	0.588216	3.1983e-25
314	25861	0.565483	4.90207e-23
314	7036	0.557205	2.78626e-22
314	5657	0.538578	1.17064e-20
316	10351	0.466082	3.28184e-15
316	654	0.457946	1.12374e-14
316	5010	0.43414	3.43261e-13
316	5156	0.429203	6.75013e-13
317	22834	0.457731	1.16039e-14
317	841	0.452854	2.38815e-14
317	22978	0.399278	3.24085e-11
317	54941	0.391136	8.70676e-11
318	30968	0.494213	3.58372e-17
318	10488	0.474463	8.91949e-16
318	11258	0.463864	4.60536e-15
318	4712	0.421522	1.89189e-12
319	3827	0.653269	1.55026e-32
319	55532	0.627357	2.04876e-29
319	2243	0.61811	2.26711e-28
319	5678	0.61613	3.75474e-28
320	718	0.372773	7.33965e-10
320	3691	0.341555	2.05056e-08
320	81844	0.338798	2.70515e-08
320	392	0.329092	7.02226e-08
321	164656	0.389211	1.09552e-10
321	2245	0.358228	3.6224e-09
321	8744	0.354922	5.14966e-09
321	398	0.341246	2.1156e-08
322	4355	0.482151	2.6158e-16
322	25789	0.477949	5.13363e-16
322	8940	0.466145	3.25005e-15
322	79187	0.464883	3.94257e-15
323	4052	0.441879	1.16278e-13
323	2549	0.424337	1.30072e-12
323	79730	0.416855	3.49389e-12
323	8315	0.405771	1.44509e-11
324	9867	0.611302	1.2656e-27
324	1105	0.549851	1.2535e-21
324	167227	0.515275	9.17865e-19
324	1456	0.498506	1.73294e-17
325	4978	0.471151	1.49901e-15
325	731	0.35224	6.83026e-09
325	8431	0.333948	4.3749e-08
325	5340	0.313353	3.07797e-07
326	5030	0.811071	4.33432e-61
326	340351	0.735769	6.89296e-45
326	1609	0.717415	9.26407e-42
326	5309	0.708802	2.24217e-40
327	55152	0.609802	1.83813e-27
327	5859	0.6078	3.01574e-27
327	95	0.581332	1.5303e-24
327	63891	0.535066	2.30896e-20
328	10419	0.59025	1.99985e-25
328	56339	0.569135	2.24196e-23
328	51292	0.550324	1.13918e-21
328	10038	0.544237	3.85383e-21
329	54851	0.626482	2.58118e-29
329	114908	0.625012	3.79845e-29
329	60496	0.620537	1.21596e-28
329	9702	0.608828	2.34008e-27
330	6364	0.507444	3.69337e-18
330	6289	0.486968	1.1938e-16
330	837	0.457531	1.19546e-14
330	100528017	0.455966	1.50891e-14
332	7083	0.774324	2.13234e-52
332	1058	0.725262	4.57403e-43
332	57405	0.697386	1.28517e-38
332	11065	0.678852	6.21532e-36
333	119	0.432079	4.5583e-13
333	3757	0.419063	2.61688e-12
333	9118	0.417908	3.04501e-12
333	576	0.408531	1.01975e-11
334	399979	0.640048	6.61116e-31
334	6734	0.637863	1.20804e-30
334	9538	0.637837	1.21657e-30
334	4798	0.572052	1.19174e-23
335	50939	0.467169	2.77715e-15
335	5121	0.451575	2.88039e-14
335	655	0.408948	9.67103e-12
335	3485	0.39564	5.05645e-11
336	58510	0.816137	1.94617e-62
336	5225	0.766668	8.60344e-51
336	3053	0.760947	1.24458e-49
336	2147	0.758308	4.16315e-49
337	10661	0.775296	1.31959e-52
337	6360	0.745119	1.38728e-46
337	1369	0.737381	3.5569e-45
337	5225	0.735568	7.48267e-45
338	3050	0.535886	1.97148e-20
338	213	0.501818	9.82541e-18
338	7018	0.49693	2.26535e-17
338	212	0.475196	7.94561e-16
339	10562	0.291809	2.03535e-06
339	26154	0.287456	2.92737e-06
339	1015	0.281705	4.68804e-06
339	8456	0.259421	2.63878e-05
341	348	0.841518	7.04658e-70
341	9535	0.807504	3.64574e-60
341	962	0.795559	3.33363e-57
341	9450	0.776003	9.29592e-53
343	5453	0.508427	3.10742e-18
343	5225	0.508196	3.2364e-18
343	8328	0.485273	1.57544e-16
343	6663	0.480422	3.45643e-16
344	9450	0.705197	8.22221e-40
344	341	0.690836	1.20427e-37
344	7462	0.669113	1.33816e-34
344	3082	0.661243	1.47016e-33
345	3053	0.810691	5.45035e-61
345	336	0.743963	2.26869e-46
345	4990	0.703817	1.34513e-39
345	4635	0.661701	1.28136e-33
346	348	0.465713	3.47262e-15
346	341	0.460402	7.77687e-15
346	344	0.399298	3.23265e-11
346	1414	0.372194	7.83309e-10
347	23460	0.507607	3.58961e-18
347	10351	0.500395	1.25472e-17
347	5156	0.494286	3.54e-17
347	4969	0.448064	4.79927e-14
348	341	0.841518	7.04658e-70
348	3587	0.721048	2.33089e-42
348	951	0.711268	9.11205e-41
348	7805	0.707872	3.14143e-40
350	213	0.688088	3.02539e-37
350	174	0.628934	1.34902e-29
350	2301	0.547409	2.04826e-21
350	2266	0.529214	7.03485e-20
351	3984	0.423208	1.51217e-12
351	8148	0.420982	2.0319e-12
351	478	0.410814	7.62429e-12
351	5335	0.403737	1.8646e-11
353	51693	0.679474	5.08814e-36
353	1327	0.588506	2.99208e-25
353	22980	0.585019	6.64761e-25
353	79767	0.565681	4.69964e-23
354	27023	0.745276	1.29756e-46
354	64096	0.740709	8.93935e-46
354	2812	0.734427	1.19078e-44
354	8175	0.733993	1.42017e-44
355	241	0.523952	1.88111e-19
355	9562	0.503754	7.03047e-18
355	10179	0.474893	8.33481e-16
355	5552	0.473332	1.0657e-15
356	30009	0.8774	5.43694e-83
356	919	0.872718	4.64732e-81
356	3560	0.866307	1.55428e-78
356	3458	0.85655	6.20286e-75
357	4935	0.669105	1.34177e-34
357	55841	0.545	3.31215e-21
357	80206	0.431949	4.64036e-13
357	11238	0.404627	1.66823e-11
358	79987	0.440613	1.39078e-13
358	5159	0.427557	8.43687e-13
358	1301	0.417833	3.07478e-12
358	10268	0.394804	5.59708e-11
359	8941	0.771527	8.37261e-52
359	27022	0.740141	1.13341e-45
359	79748	0.735303	8.33533e-45
359	54328	0.733491	1.74066e-44
360	573	0.394576	5.75387e-11
360	3860	0.33028	6.25903e-08
360	66002	0.32615	9.31646e-08
360	8581	0.317931	2.02008e-07
361	6013	0.277997	6.31637e-06
361	10907	0.265812	1.63276e-05
361	11201	0.260245	2.48209e-05
361	56906	0.248199	5.95098e-05
362	363	0.637476	1.34348e-30
362	25984	0.407681	1.13568e-11
362	23500	0.375265	5.5387e-10
362	2118	0.363952	1.95105e-09
363	362	0.637476	1.34348e-30
363	23500	0.421164	1.98357e-12
363	1848	0.41478	4.57627e-12
363	81848	0.408866	9.77232e-12
366	114	0.428206	7.72808e-13
366	7051	0.396949	4.31108e-11
366	1410	0.376583	4.76755e-10
366	5368	0.375743	5.24589e-10
367	9687	0.504851	5.81124e-18
367	4345	0.492647	4.6596e-17
367	114	0.439017	1.74079e-13
367	5318	0.426044	1.03456e-12
368	4547	0.399523	3.14425e-11
368	4130	0.396627	4.484e-11
368	6462	0.381108	2.83522e-10
368	8153	0.37122	8.73693e-10
369	2002	0.613027	8.21731e-28
369	4141	0.60654	4.11075e-27
369	28952	0.576973	4.04623e-24
369	55147	0.570142	1.80391e-23
372	1798	0.5034	7.47486e-18
372	9159	0.453428	2.19525e-14
372	26003	0.43025	5.8536e-13
372	23365	0.428674	7.25255e-13
373	64924	0.708465	2.53407e-40
373	23398	0.618792	1.90395e-28
373	9765	0.593425	9.54138e-26
373	5884	0.582231	1.24998e-24
377	5869	0.542399	5.54182e-21
377	6602	0.527317	1.00485e-19
377	60673	0.513659	1.22716e-18
377	65244	0.504283	6.41367e-18
378	9861	0.583814	8.74147e-25
378	5162	0.560004	1.55663e-22
378	28972	0.539086	1.06046e-20
378	25994	0.511159	1.91651e-18
379	312	0.391366	8.46981e-11
379	55220	0.388837	1.14536e-10
379	367	0.385658	1.66755e-10
379	10610	0.380519	3.03493e-10
381	9296	0.469494	1.93913e-15
381	10980	0.445134	7.31487e-14
381	10922	0.433095	3.96453e-13
381	155066	0.41404	5.03606e-12
382	6655	0.521065	3.20398e-19
382	79944	0.468428	2.28697e-15
382	11183	0.434721	3.16742e-13
382	10379	0.411958	6.58499e-12
383	4821	0.405479	1.49903e-11
383	4137	0.390393	9.51582e-11
383	4295	0.390034	9.93198e-11
383	2044	0.370414	9.56084e-10
384	55839	0.370348	9.63096e-10
384	9412	0.3577	3.83249e-09
384	5562	0.354833	5.19812e-09
384	5810	0.35066	8.05657e-09
387	830	0.675785	1.65483e-35
387	8801	0.637171	1.46063e-30
387	2935	0.633778	3.67908e-30
387	10179	0.628246	1.61923e-29
388	23645	0.482696	2.39533e-16
388	3164	0.472837	1.15174e-15
388	1843	0.452812	2.40293e-14
388	3399	0.437785	2.06864e-13
389	6301	0.415402	4.22126e-12
389	11147	0.382168	2.50714e-10
389	1020	0.375038	5.68298e-10
389	3611	0.369493	1.05935e-09
390	10769	0.433766	3.61431e-13
390	3667	0.433125	3.94788e-13
390	51421	0.429107	6.83878e-13
390	3491	0.418683	2.75073e-12
391	3611	0.629776	1.07811e-29
391	1200	0.59318	1.01055e-25
391	920	0.541967	6.03383e-21
391	7040	0.531953	4.18787e-20
392	1408	0.481395	2.95511e-16
392	9793	0.433366	3.81916e-13
392	55343	0.415826	3.99529e-12
392	55709	0.40362	1.89198e-11
393	4542	0.340418	2.29944e-08
393	554	0.339399	2.54723e-08
393	54739	0.337037	3.22428e-08
393	4204	0.333913	4.38995e-08
394	29966	0.617517	2.6381e-28
394	58533	0.604098	7.46573e-27
394	6729	0.582294	1.23235e-24
394	51562	0.551675	8.66159e-22
395	54873	0.44473	7.75015e-14
395	55022	0.429643	6.35792e-13
395	8436	0.407974	1.09435e-11
395	5799	0.402361	2.21319e-11
396	51547	0.661908	1.20411e-33
396	2873	0.646664	1.03464e-31
396	55666	0.601242	1.49013e-26
396	64118	0.600977	1.58847e-26
397	199	0.741953	5.30489e-46
397	945	0.726283	3.0692e-43
397	54518	0.723457	9.22444e-43
397	9535	0.721537	1.93257e-42
398	4355	0.544061	3.99045e-21
398	25861	0.527476	9.75434e-20
398	7101	0.52693	1.08035e-19
398	7448	0.514075	1.13897e-18
399	4068	0.853662	6.41926e-74
399	915	0.830741	1.44055e-66
399	27240	0.821336	7.27917e-64
399	27334	0.814339	5.91933e-62
400	55681	0.676893	1.16345e-35
400	64431	0.661999	1.17177e-33
400	79023	0.655645	7.74206e-33
400	389898	0.576274	4.72203e-24
401	387509	0.981213	1.57471e-183
401	2906	0.975962	4.4502e-170
401	54345	0.974448	9.45246e-167
401	5455	0.970838	1.45884e-159
402	9049	0.511782	1.71552e-18
402	29901	0.490086	7.13804e-17
402	741	0.488136	9.85293e-17
402	7542	0.485304	1.56761e-16
403	79176	0.412617	6.05034e-12
403	79004	0.411284	7.17934e-12
403	5303	0.396837	4.37054e-11
403	27343	0.393338	6.68188e-11
405	9869	0.598673	2.75887e-26
405	11022	0.523671	1.98181e-19
405	5710	0.511104	1.93539e-18
405	11311	0.501365	1.06218e-17
406	1687	0.504516	6.1595e-18
406	56674	0.491472	5.66928e-17
406	241	0.476677	6.28549e-16
406	23673	0.459101	9.45492e-15
407	337	0.485313	1.56541e-16
407	9389	0.482377	2.52221e-16
407	10864	0.453599	2.14048e-14
407	314	0.452328	2.58004e-14
408	55843	0.54724	2.11883e-21
408	51338	0.476583	6.37995e-16
408	4689	0.468451	2.27892e-15
408	3055	0.467198	2.76486e-15
409	4542	0.574406	7.12507e-24
409	5216	0.565491	4.89352e-23
409	2874	0.55697	2.92516e-22
409	27043	0.543462	4.49315e-21
410	79174	0.423906	1.37774e-12
410	9997	0.38249	2.41524e-10
410	64374	0.376771	4.66648e-10
410	2629	0.368229	1.21898e-09
411	6559	0.544696	3.51816e-21
411	107	0.541478	6.64232e-21
411	83729	0.541402	6.74127e-21
411	135	0.538225	1.25384e-20
412	23303	0.456747	1.34355e-14
412	6282	0.42849	7.43596e-13
412	59272	0.42664	9.54823e-13
412	3958	0.415341	4.2548e-12
414	54960	0.496033	2.63719e-17
414	11238	0.464652	4.08385e-15
414	8481	0.456977	1.29842e-14
414	8908	0.434995	3.04966e-13
415	6927	0.506615	4.27089e-18
415	7429	0.47338	1.05768e-15
415	725	0.464592	4.12159e-15
415	10317	0.455024	1.73474e-14
416	4656	0.590765	1.77447e-25
416	55262	0.560783	1.32249e-22
416	6663	0.52894	7.4078e-20
416	64837	0.525749	1.34708e-19
417	54860	0.35915	3.28127e-09
417	5669	0.307321	5.30423e-07
417	148	0.307259	5.33388e-07
417	323	0.296708	1.34239e-06
419	2993	0.347753	1.08914e-08
419	6096	0.337943	2.94603e-08
419	2165	0.313198	3.1218e-07
419	8092	0.308281	4.86821e-07
420	8328	0.762458	6.19066e-50
420	51151	0.760617	1.44865e-49
420	2996	0.755906	1.23256e-48
420	2038	0.747463	5.07301e-47
421	9993	0.474894	8.33393e-16
421	79680	0.472718	1.1734e-15
421	7625	0.461739	6.3564e-15
421	23759	0.451828	2.77587e-14
427	526	0.629413	1.18736e-29
427	51669	0.614022	6.39868e-28
427	23673	0.598022	3.22155e-26
427	8754	0.591492	1.49871e-25
429	51555	0.673687	3.21262e-35
429	56979	0.652802	1.77582e-32
429	6514	0.632858	4.71687e-30
429	1543	0.622567	7.18807e-29
430	29760	0.380905	2.9026e-10
430	54913	0.368936	1.12709e-09
430	822	0.360717	2.77187e-09
430	55092	0.353081	6.25286e-09
432	11006	0.547556	1.9888e-21
432	2268	0.525697	1.36011e-19
432	6688	0.515466	8.86868e-19
432	653361	0.505201	5.4676e-18
433	5225	0.709903	1.50184e-40
433	336	0.68425	1.07699e-36
433	100528032	0.665033	4.67827e-34
433	8431	0.66111	1.53007e-33
435	51619	0.476929	6.03846e-16
435	11344	0.432582	4.2539e-13
435	54606	0.419769	2.38465e-12
435	9114	0.409167	9.40571e-12
439	7001	0.681665	2.5049e-36
439	8677	0.671549	6.27926e-35
439	1725	0.660103	2.06783e-33
439	10535	0.637144	1.47128e-30
440	468	0.535834	1.99148e-20
440	8614	0.520092	3.82888e-19
440	5106	0.460795	7.32936e-15
440	3475	0.439427	1.64349e-13
443	8639	0.598211	3.07965e-26
443	2167	0.539268	1.02362e-20
443	11341	0.515793	8.36137e-19
443	125	0.507851	3.4386e-18
444	6917	0.45854	1.02826e-14
444	27347	0.407507	1.16096e-11
444	4907	0.372877	7.25455e-10
444	25940	0.368339	1.20419e-09
445	4702	0.397763	3.90303e-11
445	57171	0.384114	1.99843e-10
445	57720	0.372247	7.78651e-10
445	6835	0.363346	2.08436e-09
460	57795	0.571152	1.44942e-23
460	4129	0.477112	5.86505e-16
460	79825	0.46773	2.54735e-15
460	216	0.421262	1.95821e-12
462	412	0.323071	1.24832e-07
462	6195	0.323071	1.24835e-07
462	6548	0.321556	1.43997e-07
462	2872	0.315792	2.46151e-07
463	29123	0.568608	2.51149e-23
463	51592	0.563843	6.94227e-23
463	23132	0.560174	1.50239e-22
463	81844	0.551195	9.54955e-22
466	55832	0.63942	7.86671e-31
466	51098	0.633676	3.78212e-30
466	79657	0.627567	1.93813e-29
466	1147	0.624782	4.03376e-29
467	3164	0.697309	1.31959e-38
467	2354	0.682548	1.87919e-36
467	1844	0.628347	1.57662e-29
467	7538	0.614771	5.29642e-28
468	440	0.535834	1.99148e-20
468	5435	0.529612	6.52558e-20
468	54471	0.512601	1.48267e-18
468	9567	0.506651	4.2443e-18
471	7520	0.606988	3.68295e-27
471	617	0.571269	1.41281e-23
471	79065	0.523355	2.10109e-19
471	58190	0.513716	1.2146e-18
472	55718	0.633444	4.0268e-30
472	22834	0.579834	2.14123e-24
472	54552	0.57501	6.23956e-24
472	23092	0.540597	7.89406e-21
473	148479	0.647699	7.70809e-32
473	9927	0.598801	2.67541e-26
473	22883	0.553215	6.32976e-22
473	23013	0.549587	1.32211e-21
474	6005	0.32887	7.17429e-08
474	1144	0.303913	7.1759e-07
474	1394	0.303371	7.52643e-07
474	5079	0.296832	1.32817e-06
475	27089	0.499161	1.5498e-17
475	51121	0.490236	6.96252e-17
475	10011	0.483019	2.27301e-16
475	4695	0.47955	3.97502e-16
476	478	0.81403	7.15514e-62
476	51592	0.604364	6.99755e-27
476	7812	0.48848	9.30936e-17
476	204851	0.424807	1.22132e-12
477	79825	0.391341	8.4951e-11
477	27122	0.376775	4.66433e-10
477	9104	0.374319	6.16483e-10
477	654	0.372401	7.6538e-10
478	476	0.81403	7.15514e-62
478	7798	0.494777	3.25937e-17
478	1108	0.490983	6.15046e-17
478	823	0.472272	1.25816e-15
479	8828	0.340727	2.22914e-08
479	51700	0.322046	1.37504e-07
479	3680	0.311844	3.5311e-07
479	55466	0.308908	4.60214e-07
481	29949	0.375392	5.45905e-10
481	50848	0.361434	2.56518e-09
481	3021	0.348663	9.91395e-09
481	5887	0.340108	2.37215e-08
482	1852	0.456803	1.33247e-14
482	1742	0.45144	2.93815e-14
482	8912	0.44446	8.0549e-14
482	80174	0.444321	8.21657e-14
483	9616	0.429762	6.25636e-13
483	9019	0.387207	1.38938e-10
483	55179	0.352391	6.72301e-09
483	25852	0.334165	4.28282e-08
486	8431	0.832438	4.49826e-67
486	5225	0.819968	1.74523e-63
486	6663	0.805048	1.53877e-59
486	58510	0.800341	2.29915e-58
487	55262	0.682356	2.00053e-36
487	916	0.673059	3.91359e-35
487	135	0.668672	1.53373e-34
487	8506	0.649177	5.0531e-32
488	89910	0.585665	5.73834e-25
488	11108	0.584066	8.25511e-25
488	9815	0.54089	7.45487e-21
488	6311	0.528811	7.5901e-20
489	135	0.649258	4.93706e-32
489	6693	0.614988	5.01422e-28
489	916	0.59137	1.54167e-25
489	3543	0.571211	1.43081e-23
490	4801	0.543991	4.04624e-21
490	55591	0.536467	1.76257e-20
490	80196	0.519779	4.05494e-19
490	23390	0.498459	1.7471e-17
491	9177	0.313197	3.12221e-07
491	250	0.301883	8.57555e-07
491	404093	0.292133	1.98056e-06
491	5894	0.290752	2.22442e-06
492	56673	0.3842	1.9785e-10
492	8938	0.372098	7.9187e-10
492	27019	0.370965	8.98983e-10
492	9244	0.359482	3.16637e-09
493	9877	0.594858	6.81409e-26
493	81788	0.478617	4.6153e-16
493	3915	0.453045	2.32209e-14
493	23528	0.449831	3.71449e-14
495	29118	0.402149	2.27226e-11
495	4624	0.385534	1.69202e-10
495	26038	0.378152	3.98477e-10
495	3755	0.375062	5.66753e-10
496	60494	0.480602	3.35784e-16
496	3568	0.454058	2.00055e-14
496	27019	0.445	7.45672e-14
496	22843	0.439074	1.72705e-13
498	147339	0.700997	3.64593e-39
498	4087	0.638293	1.0732e-30
498	5289	0.607665	3.11822e-27
498	9063	0.532412	3.83696e-20
501	3308	0.535807	2.00189e-20
501	6643	0.530672	5.34089e-20
501	3295	0.471726	1.37032e-15
501	51307	0.449566	3.86047e-14
506	55832	0.67066	8.28375e-35
506	2935	0.619827	1.45985e-28
506	4720	0.612423	9.56163e-28
506	5094	0.603005	9.73497e-27
509	8872	0.6929	5.98827e-38
509	23590	0.618335	2.14071e-28
509	2665	0.596377	4.76128e-26
509	6390	0.517439	6.20856e-19
513	6209	0.678519	6.91699e-36
513	55009	0.662383	1.04377e-33
513	374291	0.65008	3.89978e-32
513	5442	0.616038	3.84316e-28
514	5688	0.66894	1.41192e-34
514	9217	0.626422	2.6224e-29
514	57403	0.510723	2.07099e-18
514	6227	0.506335	4.48575e-18
515	5686	0.638941	8.97913e-31
515	10542	0.542859	5.06091e-21
515	8802	0.520229	3.73453e-19
515	10286	0.502375	8.92574e-18
516	5245	0.670903	7.67834e-35
516	10476	0.596729	4.38035e-26
516	4830	0.579799	2.1577e-24
516	10237	0.541985	6.01181e-21
517	60314	0.569676	1.99498e-23
517	22818	0.527614	9.5055e-20
517	2647	0.513294	1.30998e-18
517	25875	0.47959	3.94987e-16
518	79675	0.515583	8.68327e-19
518	26273	0.484835	1.69224e-16
518	8575	0.469529	1.9289e-15
518	9125	0.461596	6.49533e-15
521	54872	0.619185	1.72166e-28
521	170960	0.595998	5.20785e-26
521	2580	0.586781	4.44625e-25
521	80273	0.575903	5.12535e-24
522	54148	0.695496	2.46648e-38
522	539	0.586065	5.23713e-25
522	6647	0.518022	5.58526e-19
522	29104	0.498889	1.62334e-17
523	64422	0.558485	2.13646e-22
523	55032	0.459908	8.37582e-15
523	2235	0.459402	9.03776e-15
523	830	0.451932	2.73416e-14
525	23650	0.397964	3.80798e-11
525	94025	0.3911	8.74432e-11
525	23220	0.383244	2.21219e-10
525	6653	0.382718	2.35199e-10
526	427	0.629413	1.18736e-29
526	29883	0.58173	1.39925e-24
526	665	0.507896	3.41139e-18
526	4689	0.5075	3.6571e-18
527	3029	0.576079	4.93054e-24
527	1186	0.572496	1.082e-23
527	115939	0.56852	2.55914e-23
527	90864	0.562727	8.78957e-23
528	6788	0.746952	6.32273e-47
528	51366	0.707445	3.66581e-40
528	7534	0.702266	2.33072e-39
528	51123	0.643177	2.76569e-31
529	5594	0.592505	1.18348e-25
529	23786	0.539512	9.75993e-21
529	80764	0.498177	1.83311e-17
529	27440	0.489931	7.3236e-17
533	27434	0.707489	3.60783e-40
533	112950	0.541925	6.08358e-21
533	1802	0.505352	5.32491e-18
533	55624	0.451199	3.04349e-14
534	6048	0.365411	1.6632e-09
534	100302242	0.349074	9.50105e-09
534	28973	0.342245	1.91241e-08
534	4855	0.341405	2.08184e-08
535	3728	0.460345	7.84399e-15
535	10197	0.455167	1.69849e-14
535	79990	0.432043	4.58094e-13
535	163	0.429341	6.62476e-13
537	10134	0.641696	4.18274e-31
537	8273	0.609753	1.86061e-27
537	474384	0.591478	1.50366e-25
537	50814	0.569023	2.29668e-23
538	51616	0.403196	1.99478e-11
538	1121	0.391581	8.25486e-11
538	546	0.383185	2.22744e-10
538	79710	0.372621	7.4662e-10
539	522	0.586065	5.23713e-25
539	54148	0.502133	9.30589e-18
539	6647	0.499787	1.39255e-17
539	9946	0.497437	2.07883e-17
540	7102	0.402737	2.11213e-11
540	9724	0.390703	9.16945e-11
540	57669	0.389298	1.08421e-10
540	55208	0.388881	1.13935e-10
545	57018	0.483345	2.1562e-16
545	4154	0.477867	5.20148e-16
545	9276	0.428965	6.97244e-13
545	6596	0.425367	1.13313e-12
546	10009	0.574193	7.4653e-24
546	5573	0.523538	2.03089e-19
546	5716	0.487435	1.10571e-16
546	1121	0.478591	4.63391e-16
547	7345	0.443796	8.85555e-14
547	29944	0.41221	6.37511e-12
547	7216	0.38264	2.37348e-10
547	8997	0.374995	5.71084e-10
549	7507	0.517953	5.65493e-19
549	81689	0.492983	4.40489e-17
549	4686	0.464516	4.16958e-15
549	23287	0.457278	1.24156e-14
550	27429	0.594628	7.19452e-26
550	10617	0.452228	2.6179e-14
550	10322	0.442103	1.12657e-13
550	2873	0.423071	1.53995e-12
551	4654	0.916605	4.00974e-103
551	8484	0.915821	1.25006e-102
551	387509	0.905394	1.74427e-96
551	54345	0.896049	1.48069e-91
552	1282	0.461329	6.76213e-15
552	57124	0.446548	5.97185e-14
552	50509	0.428303	7.62725e-13
552	79839	0.424881	1.20927e-12
553	29999	0.346902	1.18898e-08
553	6152	0.335695	3.68275e-08
553	9283	0.33248	5.0521e-08
553	135948	0.327886	7.88772e-08
554	3897	0.462781	5.42874e-15
554	3481	0.391906	7.93865e-11
554	2155	0.380667	2.98347e-10
554	525	0.344308	1.55091e-08
558	51284	0.651745	2.4122e-32
558	719	0.63608	1.96838e-30
558	3676	0.634911	2.70613e-30
558	55843	0.616788	3.17672e-28
563	79805	0.36719	1.36741e-09
563	6462	0.360503	2.83674e-09
563	3623	0.347808	1.083e-08
563	4913	0.339955	2.40897e-08
566	70	0.535737	2.02909e-20
566	347853	0.501846	9.77708e-18
566	9152	0.482665	2.40729e-16
566	54738	0.467505	2.63712e-15
567	5552	0.588948	2.70187e-25
567	5788	0.575421	5.69999e-24
567	3134	0.568885	2.3659e-23
567	51762	0.567351	3.28886e-23
570	1369	0.7137	3.71578e-41
570	10661	0.697349	1.30141e-38
570	5077	0.671501	6.3731e-35
570	10246	0.661784	1.24977e-33
572	6811	0.568342	2.6592e-23
572	741	0.530152	5.89301e-20
572	7542	0.504964	5.69751e-18
572	25855	0.500295	1.2765e-17
573	4799	0.458503	1.034e-14
573	360	0.394576	5.75387e-11
573	54840	0.375413	5.4465e-10
573	4712	0.355012	5.10059e-09
575	23237	0.505334	5.34211e-18
575	63976	0.46505	3.84335e-15
575	23504	0.461662	6.43049e-15
575	55351	0.453487	2.17606e-14
576	23148	0.431478	4.94934e-13
576	333	0.408531	1.01975e-11
576	770	0.378763	3.71541e-10
576	2817	0.376561	4.77948e-10
577	83259	0.33538	3.79931e-08
577	2620	0.333919	4.3874e-08
577	3670	0.313502	3.03634e-07
577	5340	0.309623	4.31576e-07
578	10471	0.470174	1.74502e-15
578	6892	0.464723	4.04002e-15
578	5696	0.4602	8.0163e-15
578	3833	0.457508	1.19966e-14
579	131578	0.506171	4.61607e-18
579	56033	0.495295	2.98734e-17
579	5396	0.480713	3.29831e-16
579	5118	0.473199	1.08812e-15
580	4175	0.536603	1.71688e-20
580	51203	0.517617	6.01104e-19
580	3925	0.502846	8.22728e-18
580	5111	0.492506	4.77085e-17
581	27113	0.539694	9.41991e-21
581	2303	0.521133	3.16376e-19
581	340351	0.509851	2.41691e-18
581	2812	0.50978	2.44735e-18
582	79841	0.524181	1.80282e-19
582	9633	0.517653	5.97226e-19
582	64800	0.498119	1.85126e-17
582	83450	0.488236	9.69144e-17
585	79664	0.551668	8.67394e-22
585	83440	0.521076	3.19711e-19
585	55272	0.513677	1.22319e-18
585	10302	0.497221	2.15646e-17
586	81848	0.541914	6.09678e-21
586	2119	0.53962	9.55688e-21
586	2118	0.489003	8.53883e-17
586	10253	0.486712	1.24508e-16
587	1175	0.546988	2.22851e-21
587	4924	0.535648	2.06406e-20
587	10856	0.531464	4.59585e-20
587	8775	0.527648	9.44405e-20
590	11341	0.362152	2.37335e-09
590	26050	0.35843	3.54456e-09
590	5569	0.352458	6.67549e-09
590	223117	0.338683	2.73634e-08
593	56915	0.651291	2.75064e-32
593	2067	0.604493	6.78094e-27
593	79934	0.573091	9.50079e-24
593	1954	0.563259	7.85609e-23
594	79694	0.533316	3.22921e-20
594	55788	0.515297	9.1432e-19
594	25998	0.515079	9.50835e-19
594	8504	0.50972	2.47369e-18
595	54629	0.526248	1.22734e-19
595	4088	0.471449	1.43075e-15
595	9922	0.441029	1.31147e-13
595	64285	0.435309	2.91991e-13
596	753	0.445039	7.41484e-14
596	1112	0.420175	2.26056e-12
596	7188	0.415526	4.15379e-12
596	3667	0.410269	8.17393e-12
597	5552	0.641055	5.00007e-31
597	4688	0.613166	7.93588e-28
597	6368	0.600865	1.6318e-26
597	962	0.600218	1.90602e-26
598	81544	0.389068	1.11435e-10
598	6281	0.365007	1.73848e-09
598	83658	0.358114	3.66666e-09
598	1004	0.349295	9.28551e-09
599	26020	0.533256	3.26614e-20
599	55072	0.523833	1.92327e-19
599	5018	0.516738	7.04842e-19
599	9878	0.478013	5.08166e-16
602	5971	0.565601	4.78015e-23
602	7127	0.500761	1.17829e-17
602	22904	0.500028	1.3363e-17
602	9021	0.462906	5.32662e-15
604	1052	0.445516	6.92524e-14
604	8648	0.444038	8.55578e-14
604	4781	0.43486	3.10727e-13
604	81788	0.40633	1.34696e-11
605	57634	0.489048	8.47611e-17
605	9026	0.482093	2.64035e-16
605	79039	0.476443	6.52238e-16
605	23067	0.466966	2.86511e-15
607	23126	0.557681	2.52451e-22
607	81609	0.461888	6.21453e-15
607	93	0.399815	3.03343e-11
607	55870	0.389952	1.00302e-10
608	54900	0.85549	1.47039e-74
608	270	0.842949	2.45482e-70
608	3543	0.820692	1.09971e-63
608	57823	0.797147	1.38294e-57
610	10021	0.966254	1.23224e-151
610	2906	0.963055	9.93697e-147
610	1339	0.960816	1.51491e-143
610	401	0.949574	6.04334e-130
611	3697	0.78441	1.30049e-54
611	8328	0.773075	3.93678e-52
611	9421	0.762693	5.55029e-50
611	6663	0.754901	1.93359e-48
613	23759	0.621136	1.04159e-28
613	7625	0.609696	1.88719e-27
613	84861	0.577938	3.26637e-24
613	6598	0.577659	3.4755e-24
617	55139	0.588789	2.80321e-25
617	471	0.571269	1.41281e-23
617	58190	0.518176	5.43066e-19
617	6168	0.492581	4.71134e-17
622	6165	0.382576	2.39123e-10
622	1739	0.365541	1.63956e-09
622	9711	0.365057	1.72898e-09
622	55341	0.364054	1.92952e-09
623	624	0.67294	4.06238e-35
623	29948	0.352342	6.7577e-09
623	8061	0.337846	2.97484e-08
623	23764	0.328287	7.58935e-08
624	623	0.67294	4.06238e-35
624	1030	0.36707	1.38572e-09
624	64063	0.355388	4.9014e-09
624	2012	0.339101	2.62423e-08
627	5270	0.376643	4.73506e-10
627	966	0.340245	2.33986e-08
627	11343	0.33741	3.10684e-08
627	5265	0.329332	6.86106e-08
629	6892	0.520873	3.31875e-19
629	717	0.516481	7.38415e-19
629	1589	0.490097	7.12439e-17
629	57827	0.482272	2.5653e-16
631	27147	0.369697	1.03564e-09
631	9914	0.354083	5.62698e-09
631	80206	0.333875	4.40653e-08
631	3158	0.330338	6.22398e-08
632	100527963	0.439373	1.65606e-13
632	1725	0.428748	7.18037e-13
632	5498	0.41793	3.03627e-12
632	8677	0.396265	4.68666e-11
633	165	0.56638	4.04845e-23
633	4313	0.56568	4.7e-23
633	59	0.543153	4.77594e-21
633	83468	0.525668	1.36745e-19
634	1084	0.702554	2.10561e-39
634	6398	0.458207	1.08073e-14
634	59272	0.410571	7.86427e-12
634	9764	0.409365	9.17213e-12
635	2056	0.401331	2.51516e-11
635	6758	0.380888	2.90811e-10
635	54576	0.380113	3.18046e-10
635	2877	0.36671	1.4417e-09
636	55196	0.552009	8.09316e-22
636	116372	0.472782	1.16158e-15
636	26011	0.460194	8.02352e-15
636	10123	0.45023	3.50521e-14
637	7353	0.449927	3.66292e-14
637	23786	0.43104	5.25491e-13
637	8673	0.396717	4.43525e-11
637	64976	0.390331	9.58684e-11
638	706	0.564058	6.63378e-23
638	3914	0.423254	1.50298e-12
638	3918	0.421021	2.02158e-12
638	2707	0.388577	1.18128e-10
639	54900	0.691434	9.84109e-38
639	51411	0.648302	6.49041e-32
639	7456	0.646275	1.15526e-31
639	729230	0.645054	1.63193e-31
640	24146	0.494663	3.32258e-17
640	135	0.47504	8.14432e-16
640	23495	0.45845	1.04227e-14
640	4914	0.446819	5.74287e-14
641	9055	0.828231	7.87138e-66
641	55215	0.800145	2.56936e-58
641	5428	0.689241	2.05817e-37
641	10721	0.674074	2.84396e-35
642	5717	0.483769	2.01269e-16
642	4216	0.45729	1.23935e-14
642	6605	0.452531	2.50441e-14
642	9527	0.412011	6.54014e-12
644	7378	0.364803	1.7778e-09
644	55744	0.350539	8.15873e-09
644	9263	0.347814	1.08237e-08
644	3669	0.346402	1.25175e-08
645	112398	0.469417	1.96271e-15
645	53916	0.467733	2.5459e-15
645	29946	0.460143	8.08579e-15
645	79090	0.455285	1.66907e-14
646	6457	0.410247	8.19632e-12
646	6280	0.341916	1.97719e-08
646	51806	0.336976	3.24365e-08
646	5047	0.334931	3.97136e-08
649	55909	0.562938	8.40587e-23
649	55893	0.432294	4.4257e-13
649	2137	0.432144	4.51809e-13
649	7041	0.421091	2.0028e-12
650	5625	0.492514	4.76494e-17
650	3294	0.446384	6.11389e-14
650	1562	0.408873	9.76425e-12
650	54959	0.408202	1.06314e-11
651	22802	0.354662	5.29295e-09
651	1259	0.328064	7.75386e-08
651	5783	0.325178	1.02216e-07
651	1562	0.324922	1.04733e-07
652	4313	0.470726	1.60143e-15
652	79148	0.426623	9.57047e-13
652	978	0.376794	4.65431e-10
652	57493	0.374838	5.81321e-10
653	5069	0.649197	5.02354e-32
653	2996	0.646099	1.21436e-31
653	2081	0.642924	2.96848e-31
653	6663	0.629821	1.06512e-29
654	65997	0.551279	9.38825e-22
654	79825	0.539809	9.21053e-21
654	6943	0.527985	8.8655e-20
654	668	0.521813	2.79223e-19
655	4651	0.447416	5.26986e-14
655	5121	0.443393	9.37923e-14
655	3485	0.413974	5.0791e-12
655	50939	0.41312	5.67071e-12
656	2906	0.797817	9.5141e-58
656	610	0.779843	1.35345e-53
656	5455	0.764344	2.57094e-50
656	401	0.76332	4.14723e-50
657	9562	0.710931	1.03117e-40
657	23063	0.675863	1.61486e-35
657	2747	0.618573	2.01411e-28
657	54537	0.587429	3.83222e-25
658	6733	0.415313	4.27022e-12
658	50939	0.414261	4.89424e-12
658	23173	0.406473	1.32284e-11
658	1824	0.405546	1.48653e-11
659	1385	0.524307	1.76118e-19
659	9689	0.492318	4.92315e-17
659	10109	0.47095	1.5465e-15
659	51719	0.465563	3.55333e-15
660	23205	0.387799	1.29531e-10
660	80133	0.384796	1.84504e-10
660	729	0.381995	2.558e-10
660	80122	0.36779	1.27964e-09
661	91782	0.624739	4.08003e-29
661	55909	0.609923	1.78378e-27
661	8795	0.546842	2.29467e-21
661	55756	0.529233	7.00997e-20
662	8992	0.568399	2.62666e-23
662	4869	0.561565	1.12246e-22
662	51121	0.556223	3.41374e-22
662	9443	0.47797	5.11694e-16
663	54778	0.580106	2.01456e-24
663	54832	0.523373	2.09408e-19
663	2958	0.514558	1.04435e-18
663	9101	0.513867	1.18209e-18
664	26098	0.55789	2.41761e-22
664	10539	0.555282	4.14339e-22
664	56647	0.537351	1.48556e-20
664	5163	0.515125	9.42991e-19
665	55246	0.545456	3.02535e-21
665	5520	0.526036	1.27696e-19
665	54793	0.50814	3.26814e-18
665	526	0.507896	3.41139e-18
668	6770	0.872944	3.76309e-81
668	6943	0.809888	8.82372e-61
668	78989	0.809806	9.27148e-61
668	2626	0.796785	1.69116e-57
669	4289	0.411235	7.22369e-12
669	23554	0.408255	1.05599e-11
669	1020	0.388733	1.15959e-10
669	51422	0.383867	2.0569e-10
670	10667	0.614936	5.0808e-28
670	57128	0.52715	1.0369e-19
670	55003	0.525893	1.31144e-19
670	10799	0.521673	2.86507e-19
671	23209	0.365774	1.59822e-09
671	2775	0.329062	7.04282e-08
671	864	0.323846	1.16003e-07
671	29113	0.315925	2.43162e-07
672	10230	0.611144	1.3163e-27
672	7153	0.392145	7.71411e-11
672	23397	0.376342	4.90018e-10
672	100302274	0.376141	5.01356e-10
673	55131	0.471724	1.37075e-15
673	9690	0.408633	1.00655e-11
673	55014	0.393033	6.93282e-11
673	23608	0.357097	4.08724e-09
675	55835	0.640402	5.99464e-31
675	9928	0.566274	4.14089e-23
675	1063	0.538107	1.28296e-20
675	10615	0.531348	4.69759e-20
676	139081	0.334193	4.27076e-08
676	80070	0.330473	6.14345e-08
676	3446	0.303534	7.41941e-07
676	4618	0.302216	8.32885e-07
677	91748	0.504206	6.5003e-18
677	58517	0.45089	3.18363e-14
677	26030	0.432841	4.10542e-13
677	23503	0.421989	1.77836e-12
678	3725	0.497851	1.93765e-17
678	57827	0.49632	2.51232e-17
678	8648	0.486252	1.3425e-16
678	1052	0.468102	2.40508e-15
680	3626	0.468841	2.14574e-15
680	3697	0.458602	1.01876e-14
680	3049	0.438044	1.99518e-13
680	4161	0.435318	2.91629e-13
682	55658	0.662257	1.0842e-33
682	997	0.582973	1.05728e-24
682	5442	0.568727	2.4479e-23
682	55009	0.563019	8.26442e-23
683	25797	0.367498	1.3217e-09
683	80273	0.331156	5.74854e-08
683	9948	0.320743	1.55409e-07
683	8310	0.316397	2.32799e-07
684	2537	0.55299	6.62691e-22
684	4938	0.544397	3.73369e-21
684	23586	0.512293	1.56635e-18
684	4940	0.506611	4.274e-18
685	26057	0.408088	1.07868e-11
685	9908	0.392763	7.16183e-11
685	5978	0.382905	2.30129e-10
685	2926	0.375941	5.12928e-10
686	55831	0.43357	3.71335e-13
686	114625	0.408029	1.08669e-11
686	10533	0.398045	3.77028e-11
686	10093	0.386479	1.51398e-10
687	4783	0.461972	6.13663e-15
687	54541	0.440595	1.39417e-13
687	330	0.379391	3.4566e-10
687	25976	0.374675	5.92191e-10
688	64062	0.48421	1.87354e-16
688	22894	0.458988	9.6165e-15
688	8864	0.437537	2.14168e-13
688	9724	0.428408	7.51959e-13
689	23107	0.738064	2.68409e-45
689	6880	0.667922	1.93244e-34
689	57763	0.626273	2.72738e-29
689	1022	0.622827	6.71839e-29
694	389898	0.573936	7.89777e-24
694	7334	0.57306	9.5657e-24
694	10959	0.562769	8.71144e-23
694	64431	0.537409	1.46889e-20
695	7805	0.873292	2.72009e-81
695	51411	0.861186	1.30517e-76
695	963	0.857835	2.15676e-75
695	1536	0.857616	2.58299e-75
696	2916	0.366086	1.54424e-09
696	79847	0.362531	2.27752e-09
696	29124	0.348825	9.74969e-09
696	3211	0.336469	3.41118e-08
699	1058	0.790341	5.69303e-56
699	23397	0.762962	4.89915e-50
699	11004	0.760093	1.84298e-49
699	22974	0.753399	3.77577e-48
701	51203	0.798348	7.06969e-58
701	11339	0.769535	2.19103e-51
701	22974	0.746044	9.34036e-47
701	11004	0.726961	2.35218e-43
705	23304	0.597912	3.30746e-26
705	10591	0.591489	1.49955e-25
705	4201	0.57318	9.31825e-24
705	6631	0.561373	1.16859e-22
706	638	0.564058	6.63378e-23
706	9997	0.560125	1.51784e-22
706	23170	0.537388	1.475e-20
706	80305	0.482246	2.57584e-16
708	4927	0.676513	1.31337e-35
708	83460	0.669173	1.31348e-34
708	84268	0.661555	1.339e-33
708	55720	0.619586	1.55322e-28
710	8519	0.473093	1.10638e-15
710	3671	0.467047	2.82963e-15
710	84898	0.441697	1.19324e-13
710	716	0.441032	1.31085e-13
712	713	0.78373	1.85002e-54
712	1436	0.731638	3.67305e-44
712	11326	0.721491	1.96714e-42
712	2210	0.719698	3.90316e-42
713	712	0.78373	1.85002e-54
713	2207	0.768658	3.33688e-51
713	54209	0.733111	2.02969e-44
713	2213	0.726674	2.63253e-43
716	3383	0.498399	1.76498e-17
716	4050	0.483968	1.94874e-16
716	7412	0.474812	8.44246e-16
716	51279	0.465363	3.66332e-15
717	629	0.516481	7.38415e-19
717	8387	0.468758	2.17339e-15
717	716	0.42817	7.76552e-13
717	6892	0.415247	4.30711e-12
718	8740	0.418739	2.7305e-12
718	79085	0.408727	9.94694e-12
718	2962	0.383803	2.07243e-10
718	629	0.380495	3.04333e-10
719	7099	0.895777	2.02742e-91
719	64092	0.879346	8.11319e-84
719	51284	0.874753	6.86863e-82
719	963	0.867439	5.6928e-79
722	10551	0.513439	1.27641e-18
722	725	0.494887	3.19949e-17
722	7033	0.397249	4.15615e-11
722	27324	0.393903	6.2413e-11
725	722	0.494887	3.19949e-17
725	415	0.464592	4.12159e-15
725	10551	0.449851	3.70373e-14
725	27324	0.430131	5.94919e-13
726	5058	0.455379	1.64589e-14
726	25987	0.414439	4.78239e-12
726	81544	0.374478	6.05552e-10
726	1207	0.360105	2.96099e-09
727	5774	0.403824	1.84448e-11
727	8208	0.378093	4.01209e-10
727	81620	0.369712	1.03391e-09
727	23307	0.366208	1.52376e-09
728	8832	0.539697	9.41333e-21
728	4481	0.522604	2.41345e-19
728	141	0.503524	7.31657e-18
728	6688	0.491267	5.86576e-17
729	80122	0.648376	6.35456e-32
729	1770	0.618658	1.97081e-28
729	60494	0.618621	1.98927e-28
729	27019	0.585628	5.7871e-25
730	6943	0.854494	3.29128e-74
730	6770	0.775258	1.34467e-52
730	78989	0.763803	3.3106e-50
730	668	0.739901	1.25264e-45
731	8328	0.834512	1.06514e-67
731	348158	0.818098	5.70351e-63
731	2996	0.803422	3.94889e-59
731	6663	0.793745	9.02591e-57
732	2243	0.703166	1.69521e-39
732	2637	0.654441	1.10155e-32
732	5077	0.642618	3.23411e-31
732	8858	0.633195	4.30668e-30
733	24146	0.498266	1.80554e-17
733	3299	0.486199	1.35429e-16
733	8506	0.483106	2.24132e-16
733	177	0.483043	2.26429e-16
734	4683	0.647172	8.95639e-32
734	8767	0.604213	7.25928e-27
734	92140	0.512176	1.59948e-18
734	55353	0.494531	3.39707e-17
735	8074	0.498253	1.80953e-17
735	1446	0.494347	3.50424e-17
735	4889	0.481735	2.7977e-16
735	135	0.478763	4.50836e-16
738	3338	0.620986	1.08279e-28
738	2197	0.591702	1.42712e-25
738	9092	0.574335	7.23609e-24
738	29997	0.553042	6.55746e-22
740	10534	0.506773	4.15431e-18
740	7542	0.487265	1.13697e-16
740	6199	0.481911	2.71921e-16
740	741	0.476353	6.61694e-16
741	54663	0.695145	2.78159e-38
741	2197	0.69151	9.59375e-38
741	3338	0.616578	3.35047e-28
741	1394	0.590278	1.98657e-25
744	4602	0.437769	2.07331e-13
744	57161	0.37367	6.63445e-10
744	2891	0.370328	9.65327e-10
744	100528030	0.363927	1.95637e-09
745	8817	0.486818	1.22354e-16
745	26011	0.441426	1.23991e-13
745	2261	0.410156	8.29226e-12
745	3483	0.408515	1.02176e-11
746	4707	0.456954	1.30292e-14
746	8341	0.418372	2.86519e-12
746	55272	0.416873	3.48613e-12
746	10978	0.410447	7.99032e-12
747	2524	0.372344	7.70256e-10
747	2036	0.369655	1.04051e-09
747	26504	0.366075	1.54614e-09
747	29842	0.348855	9.71922e-09
752	6688	0.695165	2.76286e-38
752	2014	0.624892	3.91931e-29
752	51411	0.623248	6.02259e-29
752	951	0.610364	1.59867e-27
753	596	0.445039	7.41484e-14
753	8864	0.410902	7.53824e-12
753	1524	0.394249	5.98616e-11
753	9882	0.366079	1.54556e-09
754	56894	0.584484	7.50814e-25
754	6612	0.556814	3.02096e-22
754	7327	0.555442	4.0091e-22
754	23275	0.542637	5.28746e-21
755	25970	0.590061	2.08908e-25
755	8568	0.576059	4.95173e-24
755	23275	0.575729	5.32621e-24
755	177	0.561781	1.0727e-22
757	830	0.546378	2.51743e-21
757	9946	0.539652	9.49672e-21
757	25972	0.538825	1.11573e-20
757	55284	0.522522	2.45053e-19
759	8328	0.743737	2.49804e-46
759	2038	0.733946	1.44752e-44
759	2994	0.728231	1.42619e-43
759	731	0.719756	3.81694e-42
760	29880	0.406014	1.40163e-11
760	219333	0.393053	6.91561e-11
760	9818	0.392618	7.28797e-11
760	9107	0.391755	8.08357e-11
761	6456	0.417452	3.23199e-12
761	3739	0.34989	8.72952e-09
761	887	0.346187	1.27968e-08
761	11168	0.324601	1.07983e-07
762	2134	0.449958	3.64664e-14
762	10882	0.423907	1.37762e-12
762	4355	0.37066	9.30152e-10
762	3270	0.357361	3.97374e-09
763	2623	0.623001	6.42142e-29
763	10661	0.582754	1.11102e-24
763	1369	0.552181	7.81427e-22
763	570	0.521224	3.11185e-19
765	4168	0.277692	6.47229e-06
765	5617	0.263038	2.01409e-05
765	3238	0.257823	2.96956e-05
765	5449	0.25498	3.65689e-05
766	51733	0.579625	2.24317e-24
766	8328	0.573238	9.20097e-24
766	3626	0.548131	1.77233e-21
766	2249	0.541079	7.18269e-21
767	2903	0.40795	1.0977e-11
767	2239	0.393898	6.24527e-11
767	2184	0.351706	7.22284e-09
767	51176	0.338981	2.65608e-08
768	8497	0.443444	9.31055e-14
768	5352	0.437889	2.0387e-13
768	771	0.413971	5.08083e-12
768	5210	0.411973	6.57177e-12
770	79816	0.473033	1.11689e-15
770	1628	0.430405	5.73098e-13
770	7041	0.419702	2.40586e-12
770	8309	0.414534	4.72437e-12
771	7421	0.415298	4.27901e-12
771	768	0.413971	5.08083e-12
771	5209	0.39204	7.81237e-11
771	23170	0.353453	6.01293e-09
773	8433	0.795781	2.94851e-57
773	774	0.787007	3.34542e-55
773	2902	0.765077	1.82268e-50
773	64096	0.76279	5.3067e-50
774	8433	0.882419	3.75486e-85
774	4762	0.859262	6.59115e-76
[truncated: 42,198 more rows]
