# Supplementary material for: An Ensemble Strategy to Predict Prognosis in Ovarian Cancer Based on Gene Modules
Source: Front Genet. 2019 Apr 24;10:366. doi: 10.3389/fgene.2019.00366 (PMC6491874; doi:10.3389/fgene.2019.00366)
Supplement: Supplementary file 2 [file Table_2.XLSX]

## Sheet: Sheet1
The co-expression network of Subtype_2
GeneId A	GeneId B	Correlation	P-value
2	5858	0.847805	5.08452e-52
2	2869	0.533407	6.40767e-15
2	25960	0.528686	1.22026e-14
2	7010	0.522798	2.6868e-14
9	10	0.489331	1.80879e-12
9	29880	0.464423	3.12361e-11
9	2222	0.455693	8.03879e-11
9	427	0.455587	8.13054e-11
10	9	0.489331	1.80879e-12
10	5618	0.394022	3.13248e-08
10	94009	0.348471	1.25034e-06
10	4986	0.346222	1.47861e-06
12	5104	0.451026	1.31809e-10
12	1117	0.395666	2.71265e-08
12	8942	0.387074	5.70456e-08
12	5004	0.368981	2.54945e-07
13	140578	0.39987	1.87104e-08
13	79022	0.35726	6.41239e-07
13	51659	0.356549	6.77337e-07
13	5111	0.349275	1.1772e-06
14	64320	0.664576	8.19482e-25
14	2521	0.649431	2.0297e-23
14	79137	0.643367	6.97544e-23
14	64114	0.587951	1.71449e-18
15	3891	0.823243	1.26711e-46
15	27022	0.811546	2.4373e-44
15	9283	0.781729	3.56394e-39
15	56413	0.737565	7.36542e-33
16	25839	0.6216	4.70467e-21
16	9785	0.588489	1.56859e-18
16	4775	0.587891	1.7316e-18
16	23644	0.581905	4.60692e-18
18	89941	0.396913	2.43095e-08
18	28955	0.382303	8.54106e-08
18	9742	0.38032	1.00829e-07
18	100616358	0.363272	4.01382e-07
19	9619	0.44061	3.86982e-10
19	64747	0.420133	2.89972e-09
19	1213	0.41847	3.39511e-09
19	5573	0.404667	1.21681e-08
20	7461	0.534605	5.43315e-15
20	26012	0.527173	1.49676e-14
20	6709	0.525182	1.95538e-14
20	6812	0.511859	1.11919e-13
21	8312	0.498207	6.19161e-13
21	7249	0.47564	8.90816e-12
21	89941	0.474906	9.68375e-12
21	23274	0.466839	2.39322e-11
22	3476	0.487053	2.36994e-12
22	1678	0.47117	1.47679e-11
22	1349	0.459182	5.52741e-11
22	6191	0.432976	8.32937e-10
23	8449	0.690051	2.37766e-27
23	203068	0.591842	8.97617e-19
23	57176	0.580999	5.33274e-18
23	9656	0.577176	9.84071e-18
24	9411	0.446575	2.09787e-10
24	54796	0.389286	4.72036e-08
24	6894	0.379823	1.05086e-07
24	7159	0.37765	1.2584e-07
25	8021	0.647556	2.98152e-23
25	23099	0.582035	4.51076e-18
25	9328	0.560869	1.22995e-16
25	55684	0.556531	2.35283e-16
26	23209	0.442031	3.34825e-10
26	28959	0.422072	2.41003e-09
26	55365	0.419379	3.11489e-09
26	3757	0.395545	2.74153e-08
27	81033	0.59053	1.1176e-18
27	1555	0.580868	5.44648e-18
27	54856	0.542751	1.73791e-15
27	79784	0.528177	1.30722e-14
28	4736	0.601075	1.86579e-19
28	140801	0.526092	1.73092e-14
28	4975	0.509545	1.50362e-13
28	26778	0.47632	8.24363e-12
29	23140	0.594285	5.95293e-19
29	3912	0.568238	3.9964e-17
29	8728	0.560455	1.30887e-16
29	10019	0.557	2.1945e-16
30	64689	0.578242	8.3022e-18
30	11070	0.47139	1.44063e-11
30	51368	0.46022	4.94046e-11
30	7086	0.443399	2.9108e-10
31	30837	0.577587	9.21636e-18
31	8396	0.494115	1.01891e-12
31	55175	0.433795	7.67884e-10
31	5691	0.420293	2.85598e-09
32	1149	0.431561	9.58121e-10
32	100509620	0.403788	1.31727e-08
32	9370	0.399348	1.95988e-08
32	3952	0.393829	3.18563e-08
33	10351	0.459136	5.55497e-11
33	729	0.43414	7.41965e-10
33	660	0.402844	1.43415e-08
33	8639	0.387541	5.48176e-08
34	830	0.659281	2.57035e-24
34	339175	0.648846	2.28908e-23
34	64395	0.641759	9.63286e-23
34	3612	0.628345	1.32192e-21
35	51433	0.478448	6.46093e-12
35	3995	0.445596	2.32156e-10
35	5025	0.443883	2.76975e-10
35	51367	0.439724	4.23407e-10
36	56647	0.599623	2.39692e-19
36	64376	0.578665	7.75939e-18
36	11196	0.563186	8.66355e-17
36	10935	0.555706	2.65902e-16
37	57048	0.632082	6.45539e-22
37	4641	0.592244	8.39123e-19
37	26168	0.547917	8.30181e-16
37	23293	0.526042	1.74269e-14
38	6392	0.619208	7.32664e-21
38	5962	0.560605	1.27976e-16
38	25996	0.547337	9.02518e-16
38	60496	0.539612	2.7061e-15
43	79748	0.394433	3.02199e-08
43	170680	0.386755	5.8618e-08
43	3000	0.360806	4.86982e-07
43	2829	0.357443	6.32228e-07
47	6774	0.584787	2.8831e-18
47	6605	0.56679	4.99513e-17
47	147179	0.530886	9.04902e-15
47	1267	0.526616	1.61338e-14
48	10210	0.498527	5.9534e-13
48	10497	0.390212	4.35878e-08
48	8434	0.373782	1.72885e-07
48	10670	0.364423	3.66529e-07
49	23774	0.348214	1.27462e-06
49	23499	0.342404	1.95967e-06
49	5981	0.340782	2.20625e-06
49	5465	0.337716	2.75527e-06
51	5635	0.579529	6.75592e-18
51	9775	0.573656	1.71757e-17
51	6613	0.52613	1.72225e-14
51	2885	0.508566	1.7026e-13
52	1876	0.620149	6.15751e-21
52	26751	0.593828	6.42946e-19
52	10971	0.58178	4.70082e-18
52	55256	0.532556	7.20208e-15
53	57175	0.649449	2.02188e-23
53	162	0.619121	7.4452e-21
53	9513	0.606128	7.72849e-20
53	8078	0.584555	2.99464e-18
54	4318	0.537516	3.62785e-15
54	1520	0.495049	9.09892e-13
54	341	0.493627	1.08074e-12
54	101	0.484418	3.23144e-12
55	3231	0.426131	1.62987e-09
55	11221	0.405202	1.15933e-08
55	7879	0.373364	1.78875e-07
55	55266	0.36635	3.14611e-07
56	1869	0.359127	5.54982e-07
56	887	0.353117	8.80664e-07
56	65095	0.326532	6.07568e-06
56	59336	0.324867	6.81712e-06
58	70	0.459326	5.44175e-11
58	57158	0.442287	3.26204e-10
58	6876	0.423741	2.0532e-09
58	87	0.405791	1.09899e-08
59	1264	0.681594	1.76627e-26
59	5740	0.645561	4.47657e-23
59	6876	0.635874	3.08777e-22
59	27295	0.61839	8.51758e-21
70	22861	0.503375	3.26932e-13
70	1264	0.498052	6.31052e-13
70	5354	0.497623	6.65014e-13
70	3270	0.492731	1.20395e-12
71	396	0.48572	2.77351e-12
71	55666	0.471771	1.38027e-11
71	9775	0.461005	4.53721e-11
71	6594	0.427561	1.41843e-09
72	1264	0.762839	2.63953e-36
72	27295	0.673447	1.14463e-25
72	25802	0.671563	1.74866e-25
72	2200	0.658274	3.18636e-24
81	55095	0.698867	2.72859e-28
81	6829	0.679273	3.02617e-26
81	54623	0.643376	6.96252e-23
81	5704	0.568557	3.80431e-17
86	5984	0.725708	2.2379e-31
86	55669	0.69068	2.04269e-27
86	1894	0.67358	1.11088e-25
86	4711	0.650784	1.5349e-23
87	89	0.64801	2.71732e-23
87	1778	0.567363	4.57417e-17
87	11178	0.564354	7.2531e-17
87	11117	0.543	1.67756e-15
88	8460	0.434719	7.00383e-10
88	54810	0.41008	7.42724e-09
88	26256	0.399585	1.91906e-08
88	11136	0.399219	1.98246e-08
89	87	0.64801	2.71732e-23
89	2316	0.543058	1.66382e-15
89	7041	0.517326	5.52076e-14
89	165	0.512182	1.07376e-13
90	4780	0.46814	2.07153e-11
90	26003	0.454248	9.37693e-11
90	9871	0.439213	4.45911e-10
90	92104	0.414634	4.869e-09
91	5030	0.733546	2.39122e-32
91	2696	0.716852	2.5563e-30
91	8941	0.704334	6.84767e-29
91	51289	0.704173	7.1358e-29
92	10254	0.501114	4.32847e-13
92	25801	0.474192	1.05021e-11
92	79577	0.468181	2.06214e-11
92	6683	0.454206	9.41879e-11
93	9943	0.675162	7.76284e-26
93	23126	0.572338	2.1125e-17
93	607	0.560053	1.39043e-16
93	22839	0.553639	3.60742e-16
94	57124	0.475192	9.374e-12
94	1601	0.473186	1.17683e-11
94	3910	0.472235	1.3101e-11
94	9509	0.470714	1.5543e-11
95	9136	0.688751	3.2505e-27
95	6159	0.610569	3.51524e-20
95	24142	0.601612	1.7003e-19
95	25864	0.574267	1.56018e-17
97	55120	0.525757	1.81045e-14
97	2079	0.474161	1.05385e-11
97	55015	0.467398	2.24929e-11
97	8473	0.465555	2.7576e-11
98	112869	0.49992	5.01653e-13
98	80306	0.475657	8.89176e-12
98	6637	0.473836	1.0934e-11
98	54995	0.444784	2.52433e-10
100	1434	0.466175	2.57552e-11
100	6789	0.453599	1.0045e-10
100	63916	0.434887	6.88748e-10
100	10564	0.433811	7.66665e-10
101	4318	0.587314	1.90453e-18
101	23601	0.581827	4.66514e-18
101	3689	0.575047	1.37938e-17
101	64127	0.573361	1.79909e-17
102	10116	0.441372	3.58115e-10
102	9101	0.431895	9.27018e-10
102	29766	0.422454	2.32345e-09
102	5049	0.420761	2.7313e-09
103	4170	0.601937	1.60715e-19
103	6772	0.557829	1.93982e-16
103	4940	0.542067	1.91487e-15
103	4939	0.525048	1.99096e-14
104	5116	0.585417	2.60101e-18
104	9612	0.526931	1.54644e-14
104	2802	0.51091	1.26362e-13
104	8888	0.495497	8.61713e-13
105	9514	0.3793	1.09761e-07
105	7188	0.354003	8.23198e-07
105	55793	0.353379	8.63275e-07
105	5063	0.334574	3.45167e-06
107	3697	0.706091	4.36234e-29
107	1852	0.66836	3.56868e-25
107	8328	0.657023	4.15572e-24
107	5453	0.652436	1.08931e-23
108	6707	0.445629	2.31359e-10
108	3270	0.410333	7.2561e-09
108	202559	0.401965	1.55181e-08
108	7434	0.397585	2.29106e-08
109	10650	0.479781	5.54128e-12
109	55225	0.43009	1.10749e-09
109	2274	0.377387	1.28599e-07
109	30836	0.372846	1.86574e-07
112	5364	0.457152	6.87718e-11
112	10106	0.444151	2.69452e-10
112	2804	0.429331	1.19312e-09
112	7786	0.428498	1.29442e-09
113	7456	0.528794	1.20249e-14
113	54518	0.518453	4.76444e-14
113	2533	0.49048	1.57712e-12
113	10019	0.485552	2.8288e-12
114	312	0.508362	1.74733e-13
114	4056	0.48682	2.43613e-12
114	79148	0.418388	3.42137e-09
114	55784	0.412772	5.79104e-09
115	9727	0.521593	3.15205e-14
115	29855	0.507307	1.99656e-13
115	23295	0.436132	6.08122e-10
115	1408	0.429745	1.14562e-09
116	55079	0.455053	8.60644e-11
116	27035	0.451091	1.3092e-10
116	5799	0.450622	1.37536e-10
116	229	0.441059	3.69702e-10
117	653166	0.430024	1.11472e-09
117	3351	0.399954	1.85698e-08
117	29775	0.351283	1.01204e-06
117	9567	0.343275	1.83826e-06
118	6002	0.684645	8.63443e-27
118	10336	0.63173	6.90857e-22
118	100126332	0.629312	1.09909e-21
118	6047	0.622369	4.07703e-21
119	9074	0.380664	9.79747e-08
119	547	0.369897	2.36843e-07
119	9415	0.357652	6.22098e-07
119	100302263	0.339883	2.35535e-06
120	8036	0.538326	3.24026e-15
120	10285	0.490524	1.56891e-12
120	9126	0.465743	2.70119e-11
120	10935	0.451794	1.21569e-10
124	125	0.932831	1.30999e-82
124	2167	0.824997	5.56977e-47
124	1149	0.728557	1.00181e-31
124	9370	0.706212	4.22751e-29
125	124	0.932831	1.30999e-82
125	2167	0.877705	4.80351e-60
125	1149	0.834583	5.26513e-49
125	9370	0.816757	2.45199e-45
128	23173	0.711806	9.82455e-30
128	51138	0.693568	1.01205e-27
128	27068	0.630927	8.0644e-22
128	10427	0.620666	5.59573e-21
130	2044	0.509035	1.60426e-13
130	3938	0.499067	5.57115e-13
130	732	0.469975	1.68833e-11
130	4153	0.454645	8.98915e-11
131	1141	0.290119	6.47457e-05
131	8531	0.282828	0.000100224
131	78997	0.265465	0.000270561
131	4357	0.265402	0.000271499
132	51128	0.52169	3.11198e-14
132	3419	0.444714	2.54276e-10
132	65084	0.43574	6.32448e-10
132	51008	0.434435	7.20474e-10
133	6781	0.509515	1.50938e-13
133	2321	0.501364	4.19661e-13
133	7422	0.477814	6.94857e-12
133	23562	0.456538	7.3446e-11
134	4608	0.496893	7.27102e-13
134	1718	0.455597	8.12199e-11
134	54606	0.441705	3.46173e-10
134	823	0.440475	3.92345e-10
135	6663	0.706867	3.57065e-29
135	23046	0.705545	5.0195e-29
135	486	0.691284	1.76467e-27
135	1852	0.66976	2.61547e-25
140	4481	0.622623	3.88899e-21
140	2213	0.580168	6.09621e-18
140	719	0.579013	7.33906e-18
140	241	0.549098	6.99842e-16
141	4481	0.616267	1.25636e-20
141	8832	0.5632	8.64528e-17
141	80231	0.561355	1.14297e-16
141	728	0.549073	7.02398e-16
142	4931	0.68373	1.07101e-26
142	1063	0.634412	4.10834e-22
142	3192	0.632352	6.12751e-22
142	79169	0.596885	3.83022e-19
143	221154	0.564093	7.5473e-17
143	10284	0.563972	7.68736e-17
143	11215	0.523122	2.57375e-14
143	6049	0.5104	1.34851e-13
146	8941	0.678932	3.27445e-26
146	5540	0.671006	1.98082e-25
146	1104	0.642614	8.11539e-23
146	22953	0.639999	1.36827e-22
147	1212	0.444296	2.65443e-10
147	9121	0.424663	1.87877e-09
147	114884	0.422585	2.29449e-09
147	23467	0.418504	3.38422e-09
148	5790	0.288894	6.97362e-05
148	350	0.284327	9.17011e-05
148	1043	0.276946	0.000141353
148	9228	0.266215	0.000259553
150	7078	0.48992	1.68614e-12
150	57493	0.488604	1.97211e-12
150	3667	0.469173	1.84642e-11
150	83716	0.466951	2.36349e-11
151	79683	0.379666	1.06472e-07
151	80020	0.340543	2.24493e-06
151	79917	0.33665	2.97509e-06
151	23138	0.328484	5.30432e-06
152	7468	0.49239	1.25443e-12
152	4043	0.451463	1.25891e-10
152	6047	0.436967	5.59257e-10
152	9901	0.436845	5.66128e-10
153	25763	0.359801	5.26657e-07
153	570	0.355051	7.59841e-07
153	3196	0.346787	1.41777e-06
153	3172	0.339664	2.39315e-06
154	9535	0.632498	5.95682e-22
154	9459	0.631599	7.08581e-22
154	4208	0.615994	1.32051e-20
154	3082	0.597738	3.31116e-19
155	3891	0.632693	5.73619e-22
155	2797	0.617445	1.01286e-20
155	4985	0.571505	2.40642e-17
155	94027	0.564462	7.13459e-17
156	8986	0.548107	8.07629e-16
156	81570	0.525444	1.8881e-14
156	9092	0.522866	2.66268e-14
156	10589	0.518071	5.00915e-14
157	6310	0.431765	9.39029e-10
157	80124	0.406377	1.04211e-08
157	2	0.386936	5.77206e-08
157	23384	0.386896	5.79169e-08
158	56993	0.628689	1.23804e-21
158	4733	0.596105	4.37344e-19
158	6767	0.556203	2.47033e-16
158	10478	0.545992	1.09494e-15
159	9804	0.643233	7.16626e-23
159	64216	0.617743	9.59142e-21
159	51742	0.58868	1.51966e-18
159	10959	0.57329	1.81925e-17
161	6050	0.613264	2.16643e-20
161	6888	0.582874	3.93703e-18
161	59307	0.550936	5.35865e-16
161	4928	0.526015	1.7489e-14
162	2130	0.681114	1.97507e-26
162	23481	0.675765	6.76656e-26
162	84861	0.668871	3.18637e-25
162	10043	0.666604	5.25672e-25
163	8148	0.503426	3.24847e-13
163	3927	0.478129	6.702e-12
163	6830	0.476737	7.86057e-12
163	147179	0.47542	9.13435e-12
164	5713	0.473714	1.10863e-11
164	23536	0.416202	4.20392e-09
164	10328	0.412754	5.80068e-09
164	54386	0.408965	8.22821e-09
165	4313	0.749845	1.75614e-34
165	5176	0.737136	8.36021e-33
165	1289	0.733927	2.14086e-32
165	7058	0.710277	1.46938e-29
166	2767	0.583293	3.67838e-18
166	6449	0.58145	4.95806e-18
166	10362	0.541578	2.05197e-15
166	5434	0.525608	1.84696e-14
167	51520	0.256002	0.000452265
167	2151	0.253658	0.000512115
167	6407	0.253414	0.000518766
167	79722	0.24893	0.000655743
173	2044	0.492822	1.19082e-12
173	51555	0.474163	1.05361e-11
173	25763	0.460557	4.76298e-11
173	2243	0.458368	6.03438e-11
174	7018	0.574779	1.43899e-17
174	6005	0.48364	3.53942e-12
174	1638	0.47672	7.87619e-12
174	336	0.475442	9.11167e-12
175	60559	0.526193	1.70756e-14
175	54969	0.510231	1.37794e-13
175	1635	0.496412	7.70971e-13
175	55916	0.49257	1.22761e-12
176	54538	0.546447	1.02575e-15
176	79839	0.541304	2.13275e-15
176	1282	0.52261	2.7549e-14
176	1306	0.512379	1.04703e-13
177	1506	0.605217	9.0692e-20
177	8620	0.583382	3.62567e-18
177	3083	0.565175	6.39878e-17
177	2528	0.562523	9.57983e-17
178	54482	0.64008	1.3465e-22
178	6814	0.625895	2.10384e-21
178	1629	0.591735	9.13919e-19
178	11146	0.550956	5.3426e-16
181	11314	0.451771	1.21871e-10
181	9446	0.44684	2.04093e-10
181	597	0.429461	1.17805e-09
181	56729	0.42407	1.98926e-09
182	5159	0.382608	8.32533e-08
182	3672	0.378715	1.15221e-07
182	4854	0.372819	1.86985e-07
182	25758	0.371716	2.04501e-07
183	4052	0.490893	1.50122e-12
183	2247	0.483761	3.48983e-12
183	10602	0.473931	1.08163e-11
183	27303	0.468967	1.8893e-11
185	6591	0.6513	1.37939e-23
185	83468	0.638704	1.76922e-22
185	5396	0.637254	2.35526e-22
185	1909	0.635262	3.48066e-22
186	51213	0.439266	4.43528e-10
186	23017	0.432142	9.04722e-10
186	9635	0.399887	1.86815e-08
186	2173	0.387693	5.4106e-08
189	10246	0.641149	1.08818e-22
189	23495	0.63713	2.41337e-22
189	51555	0.634837	3.78137e-22
189	5313	0.602005	1.58832e-19
190	57405	0.334234	3.53626e-06
190	54478	0.317847	1.09924e-05
190	2262	0.316964	1.16636e-05
190	1033	0.304028	2.72054e-05
191	8904	0.543475	1.56828e-15
191	22913	0.508994	1.61277e-13
191	55245	0.486597	2.50125e-12
191	10953	0.480142	5.31496e-12
196	23596	0.375749	1.47171e-07
196	28969	0.366965	2.99558e-07
196	8876	0.363099	4.06879e-07
196	51454	0.359573	5.36065e-07
197	3046	0.766457	7.8146e-37
197	259	0.765996	9.1381e-37
197	7031	0.752581	7.41543e-35
197	3050	0.751149	1.16584e-34
199	5341	0.871649	2.93166e-58
199	1536	0.869987	8.73099e-58
199	3937	0.868909	1.75891e-57
199	963	0.862313	1.11926e-55
202	10973	0.457538	6.59765e-11
202	4217	0.45629	7.54181e-11
202	2309	0.442235	3.27909e-10
202	10957	0.436027	6.14528e-10
203	22845	0.517436	5.44189e-14
203	7262	0.473626	1.11964e-11
203	2021	0.421462	2.55477e-09
203	79095	0.4145	4.9304e-09
204	64766	0.601005	1.88842e-19
204	8668	0.590634	1.09839e-18
204	55721	0.52132	3.26806e-14
204	8565	0.521113	3.35843e-14
207	4140	0.654281	7.40871e-24
207	23241	0.628163	1.36861e-21
207	6468	0.614977	1.58874e-20
207	2783	0.600299	2.13325e-19
208	79934	0.757175	1.69925e-35
208	112398	0.708165	2.54999e-29
208	55095	0.630373	8.97032e-22
208	54623	0.600066	2.22092e-19
210	81932	0.526478	1.64359e-14
210	23307	0.517774	5.2069e-14
210	26190	0.445032	2.46078e-10
210	5774	0.435687	6.35814e-10
211	11344	0.54766	8.61441e-16
211	9641	0.519266	4.28302e-14
211	8314	0.489253	1.82576e-12
211	1605	0.473411	1.14725e-11
212	3053	0.606038	7.85209e-20
212	3040	0.593004	7.38606e-19
212	3045	0.537276	3.75139e-15
212	3698	0.465494	2.77621e-11
213	350	0.65366	8.43786e-24
213	1081	0.526286	1.68639e-14
213	2243	0.499977	4.98086e-13
213	2538	0.428357	1.3124e-09
214	53353	0.359522	5.38195e-07
214	25945	0.32994	4.79041e-06
214	7766	0.325404	6.56918e-06
214	53904	0.309829	1.86998e-05
215	2664	0.596672	3.97128e-19
215	10134	0.587224	1.93287e-18
215	8273	0.545168	1.23195e-15
215	4209	0.505036	2.65645e-13
216	3815	0.56197	1.0415e-16
216	4675	0.518148	4.95879e-14
216	10351	0.515299	7.1847e-14
216	9936	0.511729	1.13792e-13
217	716	0.433025	8.28937e-10
217	11037	0.413497	5.41356e-09
217	753	0.399141	1.99614e-08
217	10516	0.389472	4.64561e-08
218	10400	0.479477	5.73877e-12
218	7139	0.452324	1.14957e-10
218	79777	0.417418	3.74958e-09
218	25864	0.413675	5.32465e-09
219	6876	0.472616	1.25493e-11
219	64425	0.435493	6.48282e-10
219	7168	0.424421	1.92317e-09
219	4837	0.418858	3.27271e-09
220	5740	0.621148	5.11698e-21
220	7058	0.616836	1.13237e-20
220	6387	0.610665	3.45571e-20
220	79987	0.604332	1.05903e-19
222	5097	0.492929	1.1756e-12
222	80789	0.452125	1.17402e-10
222	25803	0.433599	7.83037e-10
222	8733	0.430776	1.03526e-09
223	80267	0.381346	9.25446e-08
223	1656	0.37234	1.9441e-07
223	55623	0.371315	2.1124e-07
223	3251	0.37118	2.13558e-07
224	5636	0.571529	2.39744e-17
224	54902	0.486557	2.51284e-12
224	57088	0.477938	6.8506e-12
224	8100	0.477667	7.06675e-12
225	2672	0.507742	1.8897e-13
225	4068	0.497504	6.74744e-13
225	27334	0.478575	6.36683e-12
225	27240	0.478412	6.48779e-12
226	10295	0.672968	1.27512e-25
226	9810	0.605755	8.25274e-20
226	5455	0.59791	3.21538e-19
226	5595	0.597056	3.72013e-19
229	4224	0.6512	1.4081e-23
229	1179	0.649122	2.16293e-23
229	27290	0.62667	1.81725e-21
229	1048	0.623668	3.19876e-21
230	768	0.510913	1.26305e-13
230	2319	0.459466	5.36011e-11
230	5210	0.42969	1.15182e-09
230	2147	0.40234	1.50041e-08
231	64838	0.401096	1.67726e-08
231	23516	0.391485	3.90509e-08
231	11142	0.35504	7.60512e-07
231	28959	0.352966	8.90822e-07
238	57060	0.392085	3.70731e-08
238	23208	0.349534	1.15454e-06
238	7042	0.329283	5.01618e-06
238	4651	0.32841	5.33204e-06
239	4110	0.381118	9.43242e-08
239	7179	0.36426	3.71301e-07
239	26290	0.356337	6.88462e-07
239	1565	0.34666	1.43118e-06
240	5880	0.474852	9.74356e-12
240	911	0.462693	3.77513e-11
240	909	0.455043	8.61629e-11
240	3689	0.454471	9.15672e-11
241	50856	0.75495	3.48285e-35
241	719	0.740125	3.43942e-33
241	963	0.726253	1.92044e-31
241	2213	0.721176	7.87505e-31
242	1406	0.340367	2.27397e-06
242	100500832	0.332677	3.94974e-06
242	6506	0.331284	4.35831e-06
242	2658	0.320094	9.44591e-06
246	566	0.456591	7.30326e-11
246	6209	0.443236	2.96001e-10
246	51206	0.441212	3.64002e-10
246	5657	0.42551	1.73102e-09
247	101	0.380671	9.79143e-08
247	2118	0.330713	4.53739e-06
247	112399	0.324282	7.09689e-06
247	653361	0.320478	9.20343e-06
248	64837	0.676905	5.216e-26
248	9214	0.659114	2.66373e-24
248	23109	0.648344	2.53761e-23
248	1852	0.646226	3.91129e-23
249	1063	0.464192	3.20389e-11
249	6654	0.45888	5.71027e-11
249	641	0.455625	8.09776e-11
249	7855	0.449259	1.58645e-10
250	251	0.607322	6.26042e-20
250	4585	0.360274	5.07606e-07
250	9687	0.351541	9.92504e-07
250	7134	0.335754	3.1724e-06
251	250	0.607322	6.26042e-20
251	554	0.405033	1.17714e-08
251	2843	0.364436	3.66154e-07
251	26085	0.325837	6.3752e-06
257	9679	0.326477	6.09926e-06
257	3150	0.291204	6.06075e-05
257	6608	0.290253	6.42215e-05
257	65243	0.288548	7.12108e-05
258	9283	0.623202	3.48986e-21
258	6677	0.598164	3.07866e-19
258	2912	0.591049	1.0249e-18
258	5313	0.576761	1.05117e-17
259	3046	0.850712	1.01082e-52
259	3050	0.839651	3.96512e-50
259	197	0.765996	9.1381e-37
259	7031	0.765223	1.18634e-36
262	8763	0.710115	1.53304e-29
262	51362	0.670873	2.04056e-25
262	892	0.586849	2.05608e-18
262	51389	0.584177	3.18509e-18
265	55171	0.322651	7.93704e-06
265	8995	0.318341	1.06332e-05
265	64600	0.311527	1.67307e-05
265	60509	0.289438	6.74775e-05
266	2538	0.386513	5.98355e-08
266	1346	0.370804	2.20154e-07
266	5730	0.346705	1.42645e-06
266	159162	0.333739	3.66293e-06
267	79148	0.393787	3.19721e-08
267	57017	0.388526	5.03874e-08
267	84342	0.374412	1.64208e-07
267	379	0.370974	2.1714e-07
268	10297	0.572842	1.95202e-17
268	29948	0.570594	2.77341e-17
268	27231	0.548635	7.48326e-16
268	6469	0.53715	3.81807e-15
269	9971	0.586866	2.05032e-18
269	6997	0.58348	3.56794e-18
269	6770	0.577969	8.67184e-18
269	5178	0.543772	1.50329e-15
270	5450	0.851218	7.60407e-53
270	608	0.850516	1.12837e-52
270	54900	0.824177	8.18723e-47
270	3887	0.796041	1.51398e-41
271	2521	0.581055	5.28452e-18
271	1108	0.580819	5.49017e-18
271	1196	0.57352	1.75476e-17
271	9826	0.555926	2.57391e-16
272	963	0.584476	3.03342e-18
272	2533	0.577543	9.28176e-18
272	5788	0.57708	9.99264e-18
272	4688	0.574081	1.60648e-17
273	26289	0.605928	8.0055e-20
273	5396	0.588815	1.48617e-18
273	83468	0.563792	7.90078e-17
273	1123	0.560535	1.29337e-16
274	4524	0.459911	5.10851e-11
274	23051	0.421145	2.63319e-09
274	747	0.403957	1.29742e-08
274	8672	0.390486	4.25721e-08
275	3931	0.470851	1.53057e-11
275	825	0.449823	1.4955e-10
275	26140	0.436955	5.59942e-10
275	1375	0.436412	5.91298e-10
279	8543	0.441333	3.59561e-10
279	29062	0.413716	5.3043e-09
279	2139	0.39153	3.8899e-08
279	10742	0.388254	5.1574e-08
283	6038	0.709009	2.04689e-29
283	2791	0.503824	3.09102e-13
283	5322	0.483921	3.42525e-12
283	3399	0.478762	6.23158e-12
284	2042	0.458755	5.78803e-11
284	5137	0.39294	3.44218e-08
284	4254	0.368378	2.67574e-07
284	2250	0.367094	2.96507e-07
285	2321	0.628283	1.33772e-21
285	2828	0.496788	7.36402e-13
285	11082	0.494904	9.2609e-13
285	7422	0.478175	6.66633e-12
286	9518	0.402966	1.41846e-08
286	23025	0.382697	8.26346e-08
286	5794	0.370361	2.28166e-07
286	7134	0.364284	3.70571e-07
287	8708	0.39089	4.11141e-08
287	56920	0.384296	7.22153e-08
287	6654	0.381764	8.93652e-08
287	126393	0.381399	9.21327e-08
288	4784	0.457712	6.4759e-11
288	23365	0.412016	6.21165e-09
288	219699	0.41021	7.33835e-09
288	2036	0.401582	1.60587e-08
290	3783	0.463975	3.28098e-11
290	7127	0.447959	1.81685e-10
290	55240	0.444523	2.59313e-10
290	79949	0.411048	6.79306e-09
291	55602	0.608794	4.82331e-20
291	1635	0.533959	5.93896e-15
291	100289097	0.505874	2.3915e-13
291	3622	0.504935	2.69043e-13
292	63932	0.664679	8.01202e-25
292	7411	0.652408	1.09564e-23
292	29071	0.636067	2.97362e-22
292	286451	0.617377	1.0257e-20
301	4071	0.481144	4.7332e-12
301	9694	0.462326	3.92921e-11
301	627	0.45639	7.46145e-11
301	10371	0.453055	1.06411e-10
302	6281	0.490164	1.63777e-12
302	4240	0.407779	9.17089e-09
302	301	0.393871	3.17409e-08
302	3853	0.392587	3.54938e-08
306	1040	0.42753	1.42268e-09
306	58478	0.412164	6.12682e-09
306	5910	0.407478	9.42617e-09
306	128	0.379021	1.12335e-07
307	8934	0.38502	6.79249e-08
307	2673	0.373871	1.71625e-07
307	10755	0.352359	9.3284e-07
307	5925	0.350794	1.05005e-06
308	9871	0.521512	3.18627e-14
308	3956	0.491813	1.34443e-12
308	5376	0.465226	2.85966e-11
308	10630	0.449628	1.52632e-10
309	1938	0.599319	2.52553e-19
309	9344	0.494527	9.69288e-13
309	25960	0.492609	1.22175e-12
309	23589	0.48549	2.84941e-12
310	56681	0.543663	1.5268e-15
310	5532	0.533117	6.66795e-15
310	11319	0.436347	5.9515e-10
310	9559	0.435005	6.80662e-10
311	81619	0.56705	4.79997e-17
311	10458	0.430795	1.03326e-09
311	56905	0.409359	7.93559e-09
311	7417	0.40067	1.74223e-08
312	114	0.508362	1.74733e-13
312	379	0.493932	1.04165e-12
312	4056	0.47037	1.61529e-11
312	3250	0.448203	1.77134e-10
313	963	0.812313	1.7466e-44
313	5788	0.79291	5.18845e-41
313	22797	0.775112	3.87975e-38
313	1536	0.764346	1.59417e-36
314	7036	0.6377	2.15688e-22
314	79444	0.577811	8.89291e-18
314	7015	0.559217	1.57625e-16
314	3697	0.549226	6.87031e-16
316	10351	0.631137	7.74531e-22
316	5156	0.590521	1.11924e-18
316	3290	0.567522	4.46342e-17
316	730	0.566928	4.89076e-17
317	841	0.562185	1.00819e-16
317	22834	0.494526	9.69447e-13
317	54797	0.493631	1.08027e-12
317	1911	0.482126	4.22291e-12
318	30968	0.621298	4.97637e-21
318	10488	0.551422	4.99194e-16
318	11258	0.53579	4.61148e-15
318	6194	0.535016	5.13276e-15
319	3827	0.64379	6.40603e-23
319	10246	0.637807	2.11182e-22
319	4153	0.592356	8.23568e-19
319	57135	0.590386	1.14476e-18
320	6595	0.373943	1.70617e-07
320	4163	0.372228	1.96172e-07
320	7458	0.372082	1.98523e-07
320	1112	0.364757	3.56987e-07
321	579	0.548236	7.92777e-16
321	4016	0.505022	2.66105e-13
321	5159	0.479787	5.53735e-12
321	5176	0.46311	3.60711e-11
322	8567	0.465351	2.82035e-11
322	4130	0.459734	5.20728e-11
322	3611	0.449347	1.57196e-10
322	85360	0.44684	2.04096e-10
323	800	0.495385	8.73497e-13
323	3912	0.473384	1.15073e-11
323	83700	0.473273	1.16527e-11
323	11167	0.471444	1.43191e-11
324	9867	0.740059	3.50769e-33
324	5921	0.650049	1.78689e-23
324	9879	0.587339	1.89669e-18
324	7905	0.571627	2.36098e-17
325	2299	0.420968	2.67797e-09
325	79748	0.416828	3.9638e-09
325	8170	0.402543	1.47334e-08
325	5540	0.400033	1.84402e-08
326	5030	0.856942	2.81658e-54
326	5309	0.819936	5.82454e-46
326	340351	0.79191	7.65511e-41
326	55336	0.789406	2.00784e-40
327	55152	0.708866	2.12473e-29
327	5859	0.627581	1.52879e-21
327	7384	0.600863	1.93535e-19
327	79714	0.569298	3.39199e-17
328	57820	0.601042	1.87655e-19
328	56339	0.568731	3.70322e-17
328	10038	0.545831	1.1204e-15
328	10419	0.545097	1.24457e-15
329	114908	0.656148	5.00124e-24
329	9702	0.540569	2.36575e-15
329	8726	0.532795	6.96968e-15
329	60496	0.532044	7.72562e-15
330	100129518	0.5715	2.40833e-17
330	3601	0.559561	1.49707e-16
330	6364	0.530333	9.75762e-15
330	10537	0.522732	2.71069e-14
332	7083	0.753186	6.11861e-35
332	1058	0.666927	4.89567e-25
332	890	0.649425	2.03209e-23
332	1033	0.647611	2.94848e-23
333	745	0.56145	1.12676e-16
333	2261	0.522466	2.8081e-14
333	576	0.489364	1.80173e-12
333	10381	0.470924	1.51798e-11
334	9538	0.565484	6.10296e-17
334	23310	0.550406	5.78849e-16
334	4798	0.538357	3.22629e-15
334	29068	0.525088	1.98019e-14
335	6441	0.41245	5.9668e-09
335	5368	0.409471	7.85456e-09
335	6339	0.403866	1.30803e-08
335	745	0.401923	1.55757e-08
336	9032	0.759257	8.62104e-36
336	345	0.727639	1.2994e-31
336	7018	0.692538	1.30116e-27
336	259	0.673849	1.0454e-25
337	10661	0.723608	4.02188e-31
337	5453	0.644219	5.87482e-23
337	5225	0.634601	3.96001e-22
337	3697	0.623072	3.57608e-21
338	3050	0.556814	2.25629e-16
338	7018	0.505988	2.35742e-13
338	7276	0.456352	7.49238e-11
338	10202	0.453594	1.0051e-10
339	124583	0.30314	2.87919e-05
339	5449	0.298983	3.74506e-05
339	117579	0.287449	7.60859e-05
339	79853	0.284378	9.14263e-05
341	348	0.737209	8.18276e-33
341	344	0.669698	2.65165e-25
341	346	0.646846	3.44697e-23
341	962	0.634958	3.69374e-22
343	4640	0.47092	1.51879e-11
343	10223	0.451117	1.30551e-10
343	7448	0.440182	4.04184e-10
343	1440	0.43124	9.88973e-10
344	341	0.669698	2.65165e-25
344	9450	0.585939	2.38785e-18
344	4066	0.54276	1.73579e-15
344	199	0.534239	5.71396e-15
345	3053	0.789639	1.83656e-40
345	9032	0.76197	3.5236e-36
345	9573	0.758406	1.13853e-35
345	336	0.727639	1.2994e-31
346	341	0.646846	3.44697e-23
346	344	0.464362	3.14447e-11
346	9450	0.424952	1.827e-09
346	51642	0.407935	9.04121e-09
347	8404	0.618416	8.47703e-21
347	23460	0.599887	2.2901e-19
347	730	0.581195	5.16722e-18
347	9452	0.56537	6.21045e-17
348	341	0.737209	8.18276e-33
348	7805	0.558323	1.80176e-16
348	6503	0.553938	3.45236e-16
348	6404	0.551766	4.74739e-16
350	213	0.65366	8.43786e-24
350	1081	0.515634	6.87915e-14
350	174	0.452835	1.08917e-10
350	7827	0.420128	2.90115e-09
351	8148	0.555538	2.72628e-16
351	3984	0.536032	4.45974e-15
351	4001	0.47408	1.06355e-11
351	29888	0.433574	7.84944e-10
353	51693	0.662106	1.40086e-24
353	1535	0.580234	6.0327e-18
353	23242	0.498531	5.95069e-13
353	8558	0.485918	2.70937e-12
354	4762	0.763666	2.00188e-36
354	27023	0.752721	7.09216e-35
354	9755	0.740215	3.34781e-33
354	2902	0.737248	8.0872e-33
355	9562	0.595996	4.45512e-19
355	9107	0.585217	2.68745e-18
355	858	0.58454	3.0022e-18
355	9236	0.574519	1.4992e-17
356	30009	0.820194	5.17841e-46
356	3458	0.812599	1.54162e-44
356	2841	0.768835	3.46992e-37
356	919	0.756703	1.97999e-35
357	55841	0.524116	2.25466e-14
357	6907	0.524106	2.25777e-14
357	4935	0.511719	1.13941e-13
357	90665	0.486158	2.63396e-12
358	5159	0.574177	1.5824e-17
358	775	0.546942	9.55274e-16
358	11178	0.532782	6.98262e-15
358	79987	0.525418	1.89465e-14
359	8941	0.62561	2.22018e-21
359	1145	0.585385	2.61472e-18
359	22953	0.583157	3.76056e-18
359	64837	0.580025	6.23868e-18
360	8542	0.403622	1.33717e-08
360	65083	0.375789	1.46686e-07
360	23780	0.366496	3.10959e-07
360	8535	0.331347	4.33906e-06
361	10912	0.333568	3.70798e-06
361	10419	0.301527	3.18994e-05
361	6232	0.298565	3.84454e-05
361	328	0.290391	6.36847e-05
362	363	0.616089	1.29789e-20
362	517	0.468665	1.95409e-11
362	6895	0.462068	4.04144e-11
362	2302	0.426046	1.64348e-09
363	362	0.616089	1.29789e-20
363	9416	0.385055	6.77232e-08
363	517	0.363616	3.90629e-07
363	79022	0.352227	9.42202e-07
366	3111	0.406909	9.92847e-09
366	312	0.401521	1.61464e-08
366	3606	0.388426	5.08174e-08
366	8876	0.378381	1.18452e-07
367	4345	0.525807	1.79847e-14
367	54873	0.454999	8.65685e-11
367	10826	0.419944	2.95218e-09
367	25818	0.41641	4.12258e-09
368	4624	0.467741	2.16529e-11
368	4355	0.464851	2.98015e-11
368	8326	0.443113	2.99741e-10
368	23109	0.433989	7.53235e-10
369	9784	0.637125	2.41554e-22
369	2002	0.595043	5.23626e-19
369	10421	0.589135	1.40939e-18
369	4141	0.577185	9.82621e-18
372	1798	0.50229	3.74163e-13
372	23534	0.468879	1.90791e-11
372	4218	0.460212	4.9445e-11
372	6675	0.444148	2.69525e-10
373	64924	0.694965	7.1835e-28
373	3842	0.643623	6.6247e-23
373	79810	0.584231	3.1572e-18
373	9765	0.5721	2.19267e-17
377	6602	0.544231	1.40824e-15
377	60673	0.536119	4.40597e-15
377	5916	0.517661	5.28429e-14
377	10445	0.504484	2.84663e-13
378	9861	0.576141	1.16001e-17
378	25994	0.535924	4.52664e-15
378	28972	0.528805	1.20074e-14
378	10159	0.511347	1.19501e-13
379	312	0.493932	1.04165e-12
379	1191	0.463001	3.64999e-11
379	57149	0.416184	4.21102e-09
379	79083	0.414187	5.07646e-09
381	64320	0.604417	1.04338e-19
381	114049	0.544048	1.44541e-15
381	5754	0.506181	2.30077e-13
381	10980	0.489458	1.78163e-12
382	79944	0.525536	1.86501e-14
382	55030	0.486794	2.44377e-12
382	5720	0.482371	4.10401e-12
382	6655	0.466408	2.51007e-11
383	4804	0.299224	3.68884e-05
383	3547	0.295773	4.57572e-05
383	9053	0.293711	5.1978e-05
383	25834	0.284026	9.33595e-05
384	387263	0.437305	5.40582e-10
384	5283	0.405029	1.17762e-08
384	3964	0.391395	3.9358e-08
384	54360	0.390585	4.22093e-08
387	55032	0.699134	2.55271e-28
387	10179	0.647702	2.89422e-23
387	8031	0.647635	2.93379e-23
387	339175	0.622264	4.15778e-21
388	1843	0.607645	5.91296e-20
388	23645	0.558416	1.77706e-16
388	2354	0.548618	7.50156e-16
388	3164	0.542816	1.72212e-15
389	6301	0.503124	3.37291e-13
389	64114	0.440365	3.96761e-10
389	55577	0.434631	7.06541e-10
389	829	0.425113	1.79882e-09
390	51421	0.559436	1.52547e-16
390	10769	0.550734	5.51826e-16
390	4008	0.436056	6.12781e-10
390	9076	0.434442	7.19997e-10
391	3611	0.604866	9.64474e-20
391	752	0.562242	9.99544e-17
391	920	0.5609	1.22416e-16
391	4791	0.557612	2.0036e-16
392	4627	0.576027	1.18106e-17
392	1408	0.561875	1.05662e-16
392	79443	0.528567	1.23997e-14
392	2316	0.507249	2.01117e-13
393	554	0.408192	8.83177e-09
393	10312	0.403069	1.4054e-08
393	4542	0.399323	1.96423e-08
393	4647	0.394216	3.07977e-08
394	23256	0.619467	6.98443e-21
394	29966	0.576571	1.08336e-17
394	5926	0.573954	1.63893e-17
394	10640	0.566351	5.34384e-17
395	2626	0.44413	2.70017e-10
395	7373	0.43366	7.78303e-10
395	9457	0.424884	1.83912e-09
395	5138	0.420493	2.80203e-09
396	2873	0.667345	4.46545e-25
396	124583	0.611028	3.23822e-20
396	64118	0.585479	2.57457e-18
396	26502	0.569147	3.47237e-17
397	1794	0.744356	9.57936e-34
397	3071	0.731074	4.88283e-32
397	695	0.729254	8.2165e-32
397	951	0.727337	1.41516e-31
398	6360	0.566046	5.5997e-17
398	1440	0.536864	3.97296e-15
398	7448	0.531625	8.18149e-15
398	8326	0.516899	5.83655e-14
399	4068	0.86564	1.41604e-56
399	919	0.804371	5.13615e-43
399	915	0.787636	3.93864e-40
399	50852	0.782288	2.90238e-39
400	79023	0.730846	5.21244e-32
400	64431	0.696994	4.35115e-28
400	55681	0.696063	5.47923e-28
400	29915	0.65258	1.05719e-23
401	387509	0.98547	4.44993e-142
401	2812	0.973294	2.93163e-118
401	54345	0.972561	3.32619e-117
401	2906	0.971762	4.37531e-116
402	9049	0.575017	1.38599e-17
402	25855	0.534807	5.2832e-15
402	10400	0.443604	2.85029e-10
402	10263	0.443358	2.92299e-10
403	4673	0.478943	6.10317e-12
403	55280	0.446824	2.04434e-10
403	8945	0.422668	2.27632e-09
403	79004	0.420597	2.77447e-09
405	9869	0.580802	5.50511e-18
405	22880	0.514732	7.73183e-14
405	11311	0.496594	7.54029e-13
405	6944	0.490032	1.66389e-12
406	1315	0.525267	1.93322e-14
406	8031	0.521479	3.20012e-14
406	6451	0.505738	2.43264e-13
406	8773	0.500542	4.64571e-13
407	5075	0.44883	1.65927e-10
407	64641	0.42699	1.49951e-09
407	80350	0.409457	7.86471e-09
407	26279	0.374022	1.69526e-07
408	1192	0.598473	2.92005e-19
408	8772	0.560737	1.25446e-16
408	6484	0.555133	2.89457e-16
408	5660	0.53267	7.09023e-15
409	51411	0.559629	1.48181e-16
409	3071	0.545423	1.18785e-15
409	5777	0.528791	1.20295e-14
409	3689	0.524257	2.21278e-14
410	79174	0.385781	6.36804e-08
410	8651	0.366457	3.11929e-07
410	25907	0.345421	1.56908e-06
410	59269	0.340058	2.32565e-06
411	6300	0.498607	5.89538e-13
411	6559	0.487385	2.2787e-12
411	2185	0.475155	9.41414e-12
411	51151	0.471144	1.48111e-11
412	8481	0.486883	2.41804e-12
412	8228	0.479023	6.04719e-12
412	9367	0.477573	7.14312e-12
412	59272	0.466905	2.37565e-11
414	54960	0.436954	5.60008e-10
414	59272	0.428866	1.24866e-09
414	8481	0.423319	2.1383e-09
414	79671	0.403964	1.29657e-08
415	27286	0.518784	4.56246e-14
415	4016	0.507921	1.84749e-13
415	9843	0.484356	3.25506e-12
415	27122	0.480616	5.0312e-12
416	4656	0.551996	4.59027e-16
416	3972	0.456343	7.4995e-11
416	3756	0.418524	3.37788e-09
416	248	0.417581	3.69249e-09
417	83483	0.431963	9.20835e-10
417	904	0.411567	6.4749e-09
417	3026	0.411489	6.52163e-09
417	860	0.398194	2.17093e-08
419	53371	0.388911	4.87505e-08
419	1393	0.377699	1.25333e-07
419	3565	0.377492	1.27497e-07
419	9908	0.349662	1.14347e-06
420	2038	0.61082	3.36135e-20
420	6512	0.605799	8.18817e-20
420	6329	0.603991	1.12404e-19
420	348158	0.602636	1.42345e-19
421	23119	0.518719	4.60158e-14
421	7625	0.482318	4.12943e-12
421	23112	0.464265	3.17835e-11
421	23617	0.456559	7.32798e-11
427	526	0.621306	4.96902e-21
427	23673	0.594679	5.56895e-19
427	3981	0.587015	2.00059e-18
427	51669	0.584053	3.24995e-18
429	51555	0.600463	2.07386e-19
429	6514	0.588505	1.5644e-18
429	8074	0.57971	6.56224e-18
429	3827	0.57154	2.393e-17
430	30837	0.414516	4.92309e-09
430	4245	0.383128	7.96926e-08
430	23138	0.381206	9.36308e-08
430	8303	0.366707	3.0579e-07
432	9332	0.534345	5.63107e-15
432	30009	0.521842	3.05011e-14
432	5729	0.512105	1.0844e-13
432	8832	0.491438	1.40636e-12
433	4066	0.525412	1.89612e-14
433	911	0.522239	2.89366e-14
433	2022	0.512817	9.89657e-14
433	910	0.511304	1.20159e-13
435	55695	0.464803	2.99561e-11
435	55954	0.453935	9.6939e-11
435	51024	0.439373	4.38766e-10
435	10552	0.435976	6.17678e-10
439	8677	0.658689	2.91678e-24
439	9784	0.632384	6.08944e-22
439	1725	0.623744	3.15345e-21
439	5300	0.621022	5.23788e-21
440	8614	0.485809	2.74441e-12
440	3475	0.475839	8.70872e-12
440	5106	0.445264	2.40246e-10
440	57761	0.444454	2.61177e-10
443	8639	0.706364	4.06558e-29
443	125	0.660518	1.97195e-24
443	79987	0.643635	6.60912e-23
443	11341	0.635128	3.57318e-22
444	2059	0.546378	1.03585e-15
444	114882	0.480014	5.39444e-12
444	3572	0.471682	1.39411e-11
444	10640	0.436363	5.94196e-10
445	80142	0.518827	4.53677e-14
445	51116	0.494305	9.95768e-13
445	4582	0.466127	2.58911e-11
445	5742	0.465655	2.72755e-11
460	57795	0.642424	8.43157e-23
460	8395	0.48785	2.15678e-12
460	9427	0.469136	1.85412e-11
460	140597	0.432711	8.55091e-10
462	11092	0.350215	1.09696e-06
462	259173	0.331803	4.20168e-06
462	6812	0.326996	5.88337e-06
462	57706	0.325848	6.37036e-06
463	29123	0.749911	1.71995e-34
463	4335	0.658724	2.89473e-24
463	23132	0.657943	3.41901e-24
463	10725	0.629816	9.9808e-22
466	10959	0.610681	3.44552e-20
466	10308	0.610463	3.58255e-20
466	55832	0.600866	1.93438e-19
466	27230	0.58958	1.30901e-18
467	3164	0.74293	1.47784e-33
467	1843	0.720994	8.27895e-31
467	1844	0.71249	8.19975e-30
467	2354	0.699532	2.31012e-28
468	54471	0.494731	9.45673e-13
468	9567	0.460288	4.90423e-11
468	27352	0.41319	5.57036e-09
468	5435	0.40692	9.91878e-09
471	79137	0.495068	9.07789e-13
471	4691	0.479244	5.8953e-12
471	7520	0.477326	7.34833e-12
471	10152	0.455477	8.22667e-11
472	22834	0.612924	2.30357e-20
472	55718	0.581197	5.16488e-18
472	7011	0.525696	1.82544e-14
472	54552	0.525279	1.93024e-14
473	148479	0.654426	7.18675e-24
473	9927	0.584656	2.94549e-18
473	10277	0.569059	3.51995e-17
473	6248	0.559183	1.58446e-16
474	3443	0.366005	3.23344e-07
474	55821	0.335068	3.33193e-06
474	29124	0.318456	1.05511e-05
474	63973	0.295984	4.51636e-05
475	27089	0.637116	2.41988e-22
475	4695	0.623785	3.12939e-21
475	10011	0.596018	4.43871e-19
475	8992	0.576406	1.11224e-17
476	478	0.820297	4.93966e-46
476	1952	0.583002	3.85633e-18
476	51592	0.534738	5.33425e-15
476	81844	0.485557	2.82697e-12
477	8639	0.571105	2.56133e-17
477	125	0.566869	4.93538e-17
477	3991	0.5432	1.63064e-15
477	443	0.542919	1.69704e-15
478	476	0.820297	4.93966e-46
478	10869	0.573387	1.79182e-17
478	823	0.546028	1.08929e-15
478	79724	0.537551	3.61024e-15
479	57535	0.308899	1.98691e-05
479	4925	0.298721	3.80726e-05
479	23508	0.29727	4.16892e-05
479	201191	0.295024	4.79309e-05
481	23531	0.380404	1.00121e-07
481	10047	0.358625	5.7701e-07
481	80223	0.349578	1.15079e-06
481	9232	0.340245	2.29416e-06
482	1742	0.446106	2.20228e-10
482	54857	0.411118	6.74952e-09
482	10691	0.389187	4.76065e-08
482	5430	0.377336	1.29151e-07
483	2992	0.434911	6.871e-10
483	545	0.379122	1.11398e-07
483	10810	0.352479	9.24371e-07
483	54463	0.35247	9.25048e-07
486	6663	0.739328	4.3633e-33
486	3697	0.724308	3.30978e-31
486	5225	0.705441	5.15579e-29
486	23046	0.700044	2.03177e-28
487	916	0.63552	3.30972e-22
487	64837	0.573448	1.77469e-17
487	55262	0.572082	2.19862e-17
487	60506	0.568944	3.58321e-17
488	11108	0.576759	1.05158e-17
488	9815	0.504548	2.82389e-13
488	6311	0.466052	2.61064e-11
488	5501	0.461737	4.18976e-11
489	6693	0.620307	5.97984e-21
489	135	0.615926	1.33687e-20
489	5790	0.594972	5.30039e-19
489	23046	0.574729	1.45039e-17
490	55188	0.45376	9.8748e-11
490	100528030	0.452425	1.13744e-10
490	7334	0.440394	3.95601e-10
490	4211	0.420427	2.81982e-09
491	50618	0.369428	2.45956e-07
491	8874	0.369077	2.52988e-07
491	1298	0.356284	6.91288e-07
491	8476	0.356048	7.03943e-07
492	2797	0.373259	1.80401e-07
492	11224	0.364486	3.6473e-07
492	1346	0.363861	3.83177e-07
492	6862	0.35996	5.20189e-07
493	9877	0.656334	4.80876e-24
493	8476	0.528561	1.24109e-14
493	2969	0.521518	3.18369e-14
493	3192	0.517825	5.17277e-14
495	10683	0.48171	4.43219e-12
495	9118	0.438518	4.78381e-10
495	55957	0.431581	9.56252e-10
495	10430	0.4223	2.35783e-09
496	27019	0.341838	2.04252e-06
496	9796	0.303216	2.86533e-05
496	56673	0.299349	3.65996e-05
496	6710	0.29099	6.14041e-05
498	4087	0.60131	1.79145e-19
498	4152	0.579573	6.70805e-18
498	147339	0.560633	1.27427e-16
498	51320	0.552218	4.44343e-16
501	3308	0.56195	1.04471e-16
501	65983	0.526295	1.68438e-14
501	6643	0.498022	6.3335e-13
501	27125	0.49308	1.15448e-12
506	4720	0.698441	3.03547e-28
506	5094	0.629402	1.08052e-21
506	4705	0.614777	1.64744e-20
506	2935	0.614084	1.86797e-20
509	23590	0.641101	1.09857e-22
509	8872	0.637601	2.19948e-22
509	2665	0.606147	7.70241e-20
509	3422	0.579307	7.00035e-18
513	55009	0.740023	3.54598e-33
513	6209	0.727758	1.25631e-31
513	374291	0.653321	9.05665e-24
513	10025	0.640756	1.17679e-22
514	5688	0.67422	9.61122e-26
514	6227	0.567233	4.66612e-17
514	149986	0.56235	9.83363e-17
514	9217	0.501896	3.92903e-13
515	10286	0.67443	9.16384e-26
515	5686	0.643862	6.31377e-23
515	10542	0.61571	1.3907e-20
515	10390	0.548749	7.36123e-16
516	5245	0.658053	3.34011e-24
516	4830	0.606277	7.52806e-20
516	55163	0.564439	7.15947e-17
516	10476	0.561023	1.20174e-16
517	60314	0.646391	3.78199e-23
517	5204	0.589517	1.32268e-18
517	10445	0.581467	4.94446e-18
517	6895	0.547762	8.48944e-16
518	79675	0.500246	4.81854e-13
518	81555	0.46098	4.5494e-11
518	7507	0.45653	7.35056e-11
518	292	0.45382	9.81296e-11
521	10296	0.637933	2.06028e-22
521	4636	0.636278	2.85294e-22
521	170960	0.635996	3.01504e-22
521	54872	0.635826	3.11706e-22
522	54148	0.750742	1.32507e-34
522	539	0.58639	2.2171e-18
522	2551	0.515232	7.24724e-14
522	29104	0.498263	6.14883e-13
523	64422	0.617632	9.78848e-21
523	285282	0.565426	6.15752e-17
523	55032	0.526056	1.7394e-14
523	11222	0.513152	9.47977e-14
525	80740	0.455779	7.96573e-11
525	50853	0.438027	5.02667e-10
525	7051	0.433674	7.77218e-10
525	4665	0.430514	1.06232e-09
526	427	0.621306	4.96902e-21
526	64747	0.570317	2.89568e-17
526	5533	0.563402	8.38296e-17
526	3689	0.543498	1.56303e-15
527	65993	0.588437	1.58218e-18
527	9091	0.580664	5.62859e-18
527	5170	0.579724	6.54779e-18
527	6923	0.553775	3.53624e-16
528	9694	0.755432	2.98272e-35
528	6788	0.732525	3.21428e-32
528	51366	0.708548	2.30838e-29
528	9166	0.695496	6.30159e-28
529	5594	0.607732	5.82265e-20
529	4733	0.588973	1.44769e-18
529	23786	0.547556	8.74523e-16
529	9342	0.543587	1.54347e-15
533	27434	0.744503	9.15817e-34
533	55624	0.64174	9.66958e-23
533	64834	0.563122	8.74797e-17
533	112950	0.533159	6.62958e-15
534	28973	0.38179	8.91641e-08
534	3781	0.336194	3.07403e-06
534	22854	0.330307	4.6686e-06
534	1000	0.327787	5.56833e-06
535	9612	0.544365	1.38153e-15
535	8943	0.518538	4.7121e-14
535	4335	0.510869	1.2702e-13
535	57473	0.510073	1.40589e-13
537	474384	0.621472	4.81785e-21
537	10134	0.611445	3.00528e-20
537	8273	0.604458	1.03598e-19
537	6901	0.575334	1.3181e-17
538	51616	0.464092	3.23922e-11
538	1349	0.406878	9.9564e-09
538	10735	0.40091	1.70534e-08
538	56180	0.385331	6.61595e-08
539	522	0.58639	2.2171e-18
539	9946	0.564044	7.60347e-17
539	7485	0.516706	5.98517e-14
539	10694	0.51586	6.68086e-14
540	51604	0.481042	4.78909e-12
540	9139	0.477341	7.33604e-12
540	64344	0.453516	1.01341e-10
540	55176	0.442193	3.29325e-10
545	9276	0.533045	6.73457e-15
545	5523	0.514529	7.93715e-14
545	9616	0.509231	1.56487e-13
545	11073	0.501566	4.09323e-13
546	51566	0.541276	2.1412e-15
546	1121	0.535795	4.60835e-15
546	10009	0.519591	4.10439e-14
546	54861	0.518422	4.78385e-14
547	26256	0.421313	2.59123e-09
547	8672	0.415011	4.70049e-09
547	84107	0.411448	6.54658e-09
547	9254	0.404547	1.23009e-08
549	81689	0.590716	1.08352e-18
549	10558	0.544845	1.29011e-15
549	23424	0.496523	7.6065e-13
549	3376	0.483199	3.72688e-12
550	27429	0.664666	8.03536e-25
550	5499	0.578235	8.3112e-18
550	7542	0.564527	7.06381e-17
550	10755	0.558611	1.72598e-16
551	4654	0.916084	3.78822e-74
551	387509	0.911039	6.08109e-72
551	8484	0.910354	1.18376e-71
551	27023	0.891598	1.58677e-64
552	79839	0.578851	7.53129e-18
552	4430	0.48345	3.6191e-12
552	57125	0.474898	9.69336e-12
552	3910	0.458428	5.99557e-11
553	11019	0.329714	4.86692e-06
553	56413	0.318632	1.04269e-05
553	10163	0.309415	1.92114e-05
553	29063	0.299466	3.63324e-05
554	3481	0.497094	7.094e-13
554	3897	0.492172	1.28769e-12
554	2155	0.413279	5.52449e-09
554	393	0.408192	8.83177e-09
558	2313	0.601076	1.86546e-19
558	9459	0.573334	1.80683e-17
558	7431	0.568542	3.81302e-17
558	11031	0.559033	1.6204e-16
563	5225	0.573168	1.8546e-17
563	29948	0.536137	4.39509e-15
563	3697	0.530293	9.81093e-15
563	64837	0.509004	1.6106e-13
566	347853	0.677781	4.2673e-26
566	5313	0.66964	2.68653e-25
566	2249	0.663733	9.84622e-25
566	8328	0.648572	2.42136e-23
567	3134	0.681033	2.01268e-26
567	834	0.658757	2.87456e-24
567	5698	0.651209	1.40553e-23
567	5788	0.634145	4.32764e-22
570	10661	0.597708	3.32793e-19
570	3938	0.586083	2.33205e-18
570	51555	0.586059	2.34107e-18
570	64579	0.578199	8.3595e-18
572	6811	0.564418	7.18187e-17
572	741	0.551074	5.25187e-16
572	26229	0.539859	2.61391e-15
572	81622	0.526888	1.55536e-14
573	54840	0.440084	4.08226e-10
573	10210	0.434288	7.31109e-10
573	10488	0.406718	1.01027e-08
573	55234	0.405573	1.12099e-08
575	398	0.454534	9.09584e-11
575	1048	0.442008	3.35613e-10
575	2118	0.438694	4.6994e-10
575	100861540	0.434885	6.88854e-10
576	784	0.521982	2.9939e-14
576	333	0.489364	1.80173e-12
576	23148	0.473084	1.19047e-11
576	745	0.468501	1.98998e-11
577	2892	0.547469	8.85561e-16
577	51554	0.536274	4.31192e-15
577	22865	0.510697	1.29849e-13
577	2982	0.509301	1.55093e-13
578	6631	0.487367	2.28373e-12
578	6892	0.479819	5.51682e-12
578	140578	0.470991	1.50661e-11
578	51596	0.460467	4.8097e-11
579	1592	0.630741	8.35809e-22
579	8111	0.611805	2.81731e-20
579	5176	0.599635	2.39164e-19
579	2246	0.593909	6.34242e-19
580	56992	0.603146	1.30247e-19
580	7520	0.531034	8.86846e-15
580	4175	0.527441	1.44364e-14
580	51203	0.51757	5.34795e-14
581	27113	0.59255	7.97136e-19
581	8484	0.529307	1.1217e-14
581	2812	0.525397	1.90005e-14
581	777	0.519817	3.98383e-14
582	9633	0.526253	1.69403e-14
582	79811	0.492589	1.22483e-12
582	83450	0.481998	4.28629e-12
582	8690	0.456778	7.15801e-11
585	26263	0.571102	2.56239e-17
585	83440	0.512467	1.03523e-13
585	56986	0.510531	1.32616e-13
585	9488	0.493467	1.10178e-12
586	81848	0.472584	1.25946e-11
586	2118	0.459922	5.10223e-11
586	23531	0.440489	3.91787e-10
586	26018	0.430064	1.11032e-09
587	10856	0.62155	4.7486e-21
587	79760	0.555645	2.68312e-16
587	6141	0.552165	4.47803e-16
587	593	0.537939	3.42029e-15
590	9464	0.640807	1.16488e-22
590	11341	0.635903	3.07064e-22
590	79987	0.606249	7.5657e-20
590	5740	0.602974	1.34221e-19
593	56915	0.679884	2.62763e-26
593	10567	0.540396	2.42377e-15
593	587	0.537939	3.42029e-15
593	2067	0.536253	4.32455e-15
594	26054	0.682613	1.39198e-26
594	79694	0.582209	4.38563e-18
594	8504	0.573727	1.69853e-17
594	57150	0.561	1.20591e-16
595	5493	0.537792	3.49094e-15
595	4240	0.477426	7.26424e-12
595	4088	0.470487	1.59429e-11
595	113146	0.463415	3.48837e-11
596	1808	0.50836	1.74766e-13
596	9882	0.488381	2.02498e-12
596	4094	0.485028	3.00844e-12
596	1112	0.484353	3.25629e-12
597	5552	0.736075	1.14261e-32
597	9535	0.711644	1.02556e-29
597	2745	0.686857	5.11143e-27
597	11314	0.676475	5.75514e-26
598	51654	0.487963	2.12802e-12
598	9777	0.48751	2.2452e-12
598	9371	0.482921	3.84952e-12
598	83658	0.47608	8.47264e-12
599	26020	0.587929	1.72072e-18
599	55072	0.538384	3.21396e-15
599	5018	0.50252	3.63643e-13
599	8106	0.497588	6.67904e-13
602	5971	0.53887	3.00299e-15
602	4582	0.525501	1.87365e-14
602	7127	0.522397	2.83387e-14
602	22904	0.460049	5.03269e-11
604	1052	0.511713	1.14021e-13
604	4781	0.468064	2.08898e-11
604	9766	0.454575	9.05648e-11
604	58500	0.440513	3.90854e-10
605	9026	0.5926	7.90457e-19
605	9921	0.481618	4.4798e-12
605	79720	0.46404	3.25758e-11
605	55596	0.441103	3.6807e-10
607	23126	0.623462	3.32421e-21
607	93	0.560053	1.39043e-16
607	81609	0.51688	5.85116e-14
607	23405	0.509017	1.60802e-13
608	270	0.850516	1.12837e-52
608	5450	0.850308	1.26799e-52
608	54900	0.822155	2.10027e-46
608	3887	0.777979	1.39312e-38
610	1339	0.963278	7.19338e-106
610	2906	0.9613	7.78501e-104
610	2812	0.955867	9.46992e-99
610	10021	0.954625	1.11866e-97
611	51151	0.699015	2.62944e-28
611	7015	0.683602	1.10375e-26
611	8328	0.679045	3.18994e-26
611	348158	0.668141	3.7453e-25
613	2130	0.593296	7.03261e-19
613	5297	0.575182	1.35025e-17
613	23759	0.54646	1.02374e-15
613	23523	0.545956	1.10054e-15
617	55139	0.478417	6.48422e-12
617	58190	0.474656	9.96306e-12
617	7701	0.406623	1.01903e-08
617	91355	0.40546	1.13248e-08
622	56922	0.553594	3.63131e-16
622	4976	0.479943	5.4388e-12
622	5984	0.459757	5.19426e-11
622	54800	0.458186	6.15355e-11
623	3569	0.585571	2.53622e-18
623	5054	0.532792	6.9728e-15
623	624	0.526054	1.73982e-14
623	8013	0.526011	1.74989e-14
624	623	0.526054	1.73982e-14
624	90627	0.446447	2.12588e-10
624	3956	0.416126	4.23417e-09
624	23452	0.414422	4.96624e-09
627	4982	0.487861	2.15384e-12
627	9982	0.480634	5.02112e-12
627	55450	0.470948	1.51401e-11
627	301	0.45639	7.46145e-11
629	6892	0.550671	5.56905e-16
629	7127	0.528476	1.25529e-14
629	1356	0.523804	2.35062e-14
629	718	0.517274	5.55837e-14
631	8736	0.378706	1.1531e-07
631	6629	0.365833	3.27806e-07
631	7473	0.361965	4.44777e-07
631	3291	0.361633	4.56489e-07
632	100527963	0.517486	5.40686e-14
632	51073	0.478028	6.77999e-12
632	5546	0.443668	2.83148e-10
632	51295	0.434666	7.04095e-10
633	4035	0.6144	1.764e-20
633	5176	0.572235	2.14659e-17
633	25802	0.566451	5.26246e-17
633	9464	0.562807	9.1758e-17
634	1084	0.67884	3.34427e-26
634	5284	0.53184	7.94434e-15
634	5721	0.49323	1.13373e-12
634	6890	0.482663	3.9672e-12
635	1179	0.500928	4.42947e-13
635	229	0.496508	7.61973e-13
635	54474	0.488733	1.94228e-12
635	55079	0.480538	5.07691e-12
636	55196	0.498035	6.32294e-13
636	11325	0.469826	1.71663e-11
636	23519	0.45531	8.374e-11
636	1108	0.437381	5.36436e-10
637	23786	0.462782	3.73855e-11
637	54951	0.413162	5.58493e-09
637	7353	0.397553	2.29744e-08
637	5594	0.370171	2.31684e-07
638	706	0.572298	2.12551e-17
638	2352	0.461262	4.41189e-11
638	8673	0.441272	3.61787e-10
638	27349	0.437662	5.21522e-10
639	7456	0.632818	5.59903e-22
639	3575	0.577262	9.70715e-18
639	5376	0.547277	9.10295e-16
639	9839	0.54641	1.03111e-15
640	931	0.610845	3.34608e-20
640	5790	0.523205	2.54541e-14
640	79037	0.486952	2.39859e-12
640	3004	0.481098	4.7585e-12
641	9055	0.792261	6.68017e-41
641	55215	0.740053	3.51369e-33
641	5428	0.670409	2.26353e-25
641	1063	0.666183	5.76524e-25
642	9527	0.50048	4.68126e-13
642	55628	0.463556	3.435e-11
642	55661	0.447584	1.88913e-10
642	51696	0.440322	3.98503e-10
644	79020	0.441188	3.64879e-10
644	29887	0.43034	1.08064e-09
644	10652	0.427469	1.43111e-09
644	55281	0.425139	1.79429e-09
645	163131	0.534546	5.47766e-15
645	29946	0.514081	8.41047e-14
645	6217	0.482564	4.01323e-12
645	92609	0.47382	1.09542e-11
646	3283	0.379419	1.0868e-07
646	23245	0.377656	1.25782e-07
646	5999	0.37265	1.89577e-07
646	51806	0.364549	3.62918e-07
649	7041	0.559669	1.47307e-16
649	79586	0.534535	5.48563e-15
649	10272	0.530623	9.37979e-15
649	1292	0.524778	2.06395e-14
650	5592	0.528729	1.21319e-14
650	1026	0.481528	4.52667e-12
650	2690	0.468512	1.98759e-11
650	2054	0.467231	2.29129e-11
651	577	0.365616	3.33481e-07
651	9499	0.357496	6.29639e-07
651	80323	0.348734	1.22595e-06
651	11155	0.324267	7.10463e-06
652	3487	0.467975	2.10975e-11
652	55068	0.448268	1.75937e-10
652	150	0.440547	3.89469e-10
652	2115	0.436753	5.71412e-10
653	1392	0.612354	2.55255e-20
653	9635	0.593582	6.70161e-19
653	7101	0.566047	5.59875e-17
653	347853	0.561877	1.05635e-16
654	730	0.561522	1.11457e-16
654	316	0.538337	3.2351e-15
654	10351	0.535334	4.91243e-15
654	65997	0.532301	7.45764e-15
655	4661	0.469912	1.70012e-11
655	29968	0.425035	1.81236e-09
655	79919	0.405707	1.10745e-08
655	2070	0.405273	1.15193e-08
656	2906	0.770899	1.70139e-37
656	610	0.766448	7.83901e-37
656	54345	0.760313	6.09422e-36
656	401	0.758654	1.05014e-35
657	54537	0.691158	1.81955e-27
657	9562	0.689546	2.68522e-27
657	439965	0.671496	1.77495e-25
657	2747	0.670169	2.38764e-25
658	22882	0.444227	2.67354e-10
658	10845	0.426639	1.55153e-09
658	60436	0.424805	1.85307e-09
658	10252	0.417605	3.68423e-09
659	23451	0.572867	1.94427e-17
659	1385	0.55401	3.41579e-16
659	4780	0.512239	1.06595e-13
659	10152	0.501205	4.2802e-13
660	22915	0.613498	2.07693e-20
660	1776	0.608344	5.22446e-20
660	7010	0.607904	5.6485e-20
660	9457	0.599505	2.44578e-19
661	91782	0.652413	1.09447e-23
661	55909	0.637303	2.33234e-22
661	79648	0.619598	6.8173e-21
661	55756	0.596641	3.99255e-19
662	8992	0.553769	3.53932e-16
662	94081	0.50114	4.31456e-13
662	26515	0.498384	6.05888e-13
662	740	0.496464	7.6611e-13
663	9101	0.529941	1.02921e-14
663	6938	0.508444	1.72914e-13
663	79811	0.461386	4.35294e-11
663	54832	0.460458	4.81423e-11
664	5163	0.556861	2.24027e-16
664	10285	0.508798	1.65327e-13
664	56901	0.497077	7.10931e-13
664	5223	0.492984	1.16786e-12
665	54793	0.644421	5.63966e-23
665	29883	0.606153	7.69411e-20
665	23362	0.596896	3.82281e-19
665	5520	0.555846	2.60458e-16
668	6770	0.767279	5.90873e-37
668	78989	0.634462	4.06855e-22
668	2626	0.631922	6.65809e-22
668	57172	0.596652	3.9851e-19
669	4708	0.465294	2.83829e-11
669	9262	0.445457	2.35506e-10
669	8674	0.416128	4.23325e-09
669	23554	0.406433	1.03676e-08
670	55003	0.634092	4.37249e-22
670	57128	0.625138	2.42673e-21
670	10667	0.585115	2.73288e-18
670	56897	0.542361	1.83686e-15
671	23017	0.462278	3.9499e-11
671	1392	0.403857	1.30911e-08
671	2078	0.382107	8.68274e-08
671	6707	0.364903	3.5288e-07
672	10230	0.502126	3.81857e-13
672	100302274	0.425145	1.79321e-09
672	7153	0.412145	6.13779e-09
672	2535	0.399698	1.89982e-08
673	79989	0.529581	1.08073e-14
673	23165	0.454965	8.68741e-11
673	55750	0.443193	2.97298e-10
673	5194	0.439668	4.25835e-10
675	79915	0.514029	8.46717e-14
675	81624	0.468395	2.01365e-11
675	3146	0.459445	5.37215e-11
675	57082	0.456759	7.17243e-11
676	4107	0.357773	6.16339e-07
676	7366	0.343066	1.86669e-06
676	6690	0.33794	2.71121e-06
676	54546	0.305816	2.4256e-05
677	3725	0.501769	3.99171e-13
677	10848	0.48475	3.10807e-12
677	23503	0.483149	3.74839e-12
677	26030	0.480406	5.15536e-12
678	28996	0.550329	5.85335e-16
678	463	0.519378	4.22076e-14
678	8648	0.474433	1.02189e-11
678	6949	0.472275	1.3042e-11
680	759	0.44824	1.7646e-10
680	3626	0.438654	4.71858e-10
680	5313	0.427119	1.48076e-09
680	6677	0.417824	3.60894e-09
682	55658	0.649152	2.14954e-23
682	55009	0.616218	1.26758e-20
682	5442	0.591524	9.46753e-19
682	6794	0.59118	1.00272e-18
683	26234	0.455803	7.94488e-11
683	27071	0.425041	1.81135e-09
683	57804	0.410262	7.30386e-09
683	3597	0.39987	1.87095e-08
684	55008	0.549527	6.57627e-16
684	2537	0.545601	1.15793e-15
684	64761	0.541548	2.06055e-15
684	4940	0.532946	6.82664e-15
685	8615	0.42706	1.4893e-09
685	23554	0.365788	3.28966e-07
685	9908	0.355358	7.42178e-07
685	441024	0.350363	1.08478e-06
686	9784	0.548254	7.90732e-16
686	3588	0.545536	1.16886e-15
686	55831	0.538218	3.28957e-15
686	10533	0.537178	3.80289e-15
687	23075	0.502943	3.45003e-13
687	5187	0.497133	7.06091e-13
687	4783	0.485365	2.89171e-12
687	8013	0.473126	1.18482e-11
688	55765	0.437934	5.074e-10
688	5493	0.43296	8.34308e-10
688	4008	0.432359	8.85502e-10
688	9724	0.423359	2.13002e-09
689	23107	0.702802	1.01209e-28
689	6880	0.654187	7.55475e-24
689	64924	0.637924	2.06376e-22
689	1022	0.602122	1.55634e-19
694	7334	0.508354	1.74897e-13
694	4069	0.475766	8.78174e-12
694	399	0.474385	1.02741e-11
694	10988	0.466456	2.49659e-11
695	7805	0.890296	4.42262e-64
695	963	0.884707	3.12618e-62
695	1536	0.839757	3.75155e-50
695	3937	0.838815	6.11057e-50
696	135948	0.384448	7.12944e-08
696	2827	0.344018	1.74038e-06
696	27190	0.340817	2.20066e-06
696	51378	0.318622	1.04343e-05
699	23397	0.741948	1.98866e-33
699	1058	0.729548	7.55558e-32
699	11004	0.713045	7.07801e-30
699	9833	0.704034	7.39317e-29
701	51203	0.71203	9.26119e-30
701	23397	0.705154	5.55073e-29
701	57082	0.700346	1.88324e-28
701	9824	0.668058	3.81453e-25
705	9477	0.714911	4.30539e-30
705	4201	0.7042	7.08659e-29
705	55168	0.682811	1.32902e-26
705	6903	0.64916	2.14587e-23
706	23170	0.593555	6.73302e-19
706	638	0.572298	2.12551e-17
706	9997	0.567015	4.82549e-17
706	27349	0.543736	1.51103e-15
708	79003	0.701548	1.39062e-28
708	51009	0.662037	1.42179e-24
708	4927	0.641518	1.01077e-22
708	84268	0.593288	7.04225e-19
710	1436	0.479498	5.72515e-12
710	80212	0.469977	1.68797e-11
710	5730	0.465154	2.88227e-11
710	712	0.458042	6.25004e-11
712	7305	0.72126	7.6949e-31
712	1436	0.69696	4.38818e-28
712	713	0.654627	6.88916e-24
712	11326	0.651535	1.31374e-23
713	712	0.654627	6.88916e-24
713	2207	0.650538	1.61517e-23
713	2350	0.619623	6.78632e-21
713	719	0.607705	5.85089e-20
716	5176	0.508931	1.62572e-13
716	8522	0.48812	2.08885e-12
716	3750	0.486825	2.43459e-12
716	165	0.484734	3.114e-12
717	1230	0.471414	1.43686e-11
717	1536	0.457259	6.79836e-11
717	1520	0.45464	8.99375e-11
717	7805	0.444938	2.48458e-10
718	629	0.517274	5.55837e-14
718	3383	0.47176	1.38203e-11
718	1718	0.456023	7.76074e-11
718	51703	0.437854	5.11483e-10
719	963	0.84193	1.20293e-50
719	3055	0.835818	2.82705e-49
719	7099	0.816382	2.9005e-45
719	64092	0.806555	2.05883e-43
722	725	0.377997	1.22285e-07
722	4179	0.373656	1.74659e-07
722	10551	0.365495	3.36704e-07
722	55647	0.362308	4.32965e-07
725	3131	0.453386	1.02745e-10
725	5243	0.445695	2.29795e-10
725	4878	0.438862	4.62029e-10
725	27284	0.436709	5.73926e-10
726	222	0.423266	2.14928e-09
726	25987	0.422102	2.40313e-09
726	6712	0.412291	6.05524e-09
726	65263	0.406029	1.07556e-08
727	51552	0.512623	1.0147e-13
727	2800	0.49285	1.18689e-12
727	23392	0.467084	2.32906e-11
727	84263	0.465334	2.82566e-11
728	8832	0.602228	1.52793e-19
728	51311	0.599577	2.41591e-19
728	7056	0.583522	3.54363e-18
728	6515	0.572305	2.12346e-17
729	730	0.611615	2.91493e-20
729	125	0.588645	1.52854e-18
729	124	0.556615	2.32385e-16
729	10351	0.554364	3.24248e-16
730	10351	0.747269	3.91463e-34
730	125	0.692505	1.31179e-27
730	124	0.677858	4.1921e-26
730	23460	0.665819	6.24416e-25
731	8328	0.777823	1.47379e-38
731	5313	0.757051	1.76896e-35
731	6663	0.744196	1.00567e-33
731	2994	0.74313	1.391e-33
732	2243	0.539284	2.83353e-15
732	319	0.534345	5.63094e-15
732	23495	0.527079	1.5158e-14
732	8858	0.522798	2.68711e-14
733	3299	0.633141	5.25906e-22
733	9605	0.554322	3.26249e-16
733	2528	0.531803	7.98425e-15
733	283870	0.523928	2.31194e-14
734	92140	0.633994	4.45616e-22
734	4683	0.629545	1.05138e-21
734	8767	0.626985	1.71199e-21
734	528	0.569726	3.17416e-17
735	1446	0.544501	1.35508e-15
735	10246	0.485473	2.8552e-12
735	25763	0.480837	4.90448e-12
735	7288	0.478483	6.43515e-12
738	9092	0.623641	3.21493e-21
738	2197	0.616697	1.1614e-20
738	4054	0.60172	1.66872e-19
738	4723	0.590057	1.20925e-18
740	5499	0.673964	1.01844e-25
740	6199	0.646238	3.90155e-23
740	741	0.594753	5.49995e-19
740	55611	0.590312	1.15891e-18
741	80194	0.704752	6.15348e-29
741	2197	0.69818	3.23949e-28
741	54663	0.676113	6.25024e-26
741	26229	0.654825	6.60838e-24
744	4192	0.492625	1.21953e-12
744	3231	0.470939	1.51547e-11
744	11174	0.404442	1.24178e-08
744	2891	0.400369	1.78969e-08
745	4485	0.617243	1.05122e-20
745	2261	0.611784	2.82783e-20
745	333	0.56145	1.12676e-16
745	3483	0.492287	1.27005e-12
746	6637	0.494944	9.21583e-13
746	1486	0.470256	1.63609e-11
746	1351	0.466918	2.37218e-11
746	6635	0.450184	1.43993e-10
747	2781	0.461124	4.47872e-11
747	55187	0.428439	1.30195e-09
747	5361	0.427119	1.48084e-09
747	8927	0.42656	1.56347e-09
752	6688	0.602748	1.39591e-19
752	29933	0.599141	2.60385e-19
752	6468	0.566607	5.13758e-17
752	391	0.562242	9.99544e-17
753	57088	0.476985	7.64062e-12
753	7168	0.465208	2.86532e-11
753	79442	0.464013	3.26742e-11
753	79949	0.460756	4.66113e-11
754	8566	0.519159	4.34365e-14
754	7327	0.51131	1.20057e-13
754	4047	0.48703	2.37638e-12
754	56894	0.472748	1.2364e-11
755	2528	0.557036	2.18278e-16
755	7327	0.512183	1.07364e-13
755	22888	0.509773	1.46066e-13
755	23275	0.507069	2.05728e-13
757	4189	0.643198	7.21621e-23
757	10311	0.637074	2.4398e-22
757	55284	0.629446	1.07138e-21
757	830	0.622771	3.78249e-21
759	1440	0.660772	1.8675e-24
759	4640	0.622295	4.13389e-21
759	1048	0.608592	4.99985e-20
759	1811	0.584064	3.24412e-18
760	51167	0.41862	3.34712e-09
760	9200	0.410663	7.03878e-09
760	9650	0.404399	1.24662e-08
760	3574	0.37691	1.33765e-07
761	56898	0.373918	1.70978e-07
761	729	0.360834	4.85895e-07
761	443	0.357782	6.15887e-07
761	25890	0.354266	8.06848e-07
762	3933	0.377964	1.22612e-07
762	57795	0.376097	1.43022e-07
762	1511	0.372148	1.97456e-07
762	26468	0.35677	6.65877e-07
763	2623	0.390876	4.11622e-08
763	5865	0.33747	2.80456e-06
763	269	0.329009	5.11345e-06
763	56985	0.324651	6.91918e-06
765	11326	0.326792	5.96731e-06
765	57338	0.315151	1.3165e-05
765	886	0.312657	1.55314e-05
765	3671	0.310382	1.80358e-05
766	347853	0.526623	1.61167e-14
766	3626	0.51616	6.42524e-14
766	8328	0.512161	1.07661e-13
766	7015	0.507053	2.06149e-13
767	6374	0.386767	5.85578e-08
767	2184	0.35288	8.96691e-07
767	54918	0.342446	1.95357e-06
767	2977	0.330107	4.7348e-06
768	5210	0.574668	1.46443e-17
768	230	0.510913	1.26305e-13
768	8497	0.456031	7.75366e-11
768	2632	0.446445	2.12627e-10
770	7089	0.419601	3.05012e-09
770	1628	0.407949	9.02978e-09
770	20	0.361148	4.74144e-07
770	79006	0.355858	7.14287e-07
771	768	0.406832	9.99853e-09
771	51129	0.386316	6.08466e-08
771	2920	0.343308	1.83385e-06
771	9021	0.342641	1.92588e-06
773	8433	0.819403	7.42844e-46
773	774	0.766775	7.01577e-37
773	64096	0.742979	1.45581e-33
773	27023	0.732148	3.58416e-32
774	8433	0.900657	8.62915e-68
774	4762	0.864897	2.25737e-56
[truncated: 42,198 more rows]
