# Supplementary material for: An Ensemble Strategy to Predict Prognosis in Ovarian Cancer Based on Gene Modules
Source: Front Genet. 2019 Apr 24;10:366. doi: 10.3389/fgene.2019.00366 (PMC6491874; doi:10.3389/fgene.2019.00366)
Supplement: Supplementary file 3 [file Table_3.XLSX]

## Sheet: Sheet1
The co-expression network of Subtype_3
GeneId A	GeneId B	Correlation	P-value
2	5858	0.683788	8.62664e-20
2	862	0.477048	5.62875e-09
2	716	0.444868	7.23006e-08
2	4638	0.444763	7.28756e-08
9	10	0.518388	1.40297e-10
9	63898	0.446087	6.59452e-08
9	54793	0.439489	1.08036e-07
9	526	0.421099	4.05153e-07
10	9	0.518388	1.40297e-10
10	91782	0.397231	2.01187e-06
10	10671	0.395283	2.28054e-06
10	51362	0.381345	5.46664e-06
12	5265	0.467701	1.21425e-08
12	2147	0.437512	1.25004e-07
12	6364	0.437189	1.28005e-07
12	5104	0.415673	5.89619e-07
13	8424	0.456136	3.0468e-08
13	2352	0.447886	5.75375e-08
13	7490	0.444592	7.38172e-08
13	6540	0.406616	1.08728e-06
14	79137	0.585547	1.0776e-13
14	10494	0.582009	1.63901e-13
14	23549	0.560759	1.83577e-12
14	64114	0.543535	1.15126e-11
15	3891	0.803472	1.59696e-31
15	9283	0.768465	2.28566e-27
15	27022	0.741789	1.1586e-24
15	6369	0.697015	8.45814e-21
16	25839	0.641183	7.10056e-17
16	2734	0.618366	1.70724e-15
16	9785	0.617833	1.83302e-15
16	55697	0.613181	3.3933e-15
18	65993	0.524625	7.69136e-11
18	7249	0.492649	1.48005e-09
18	51172	0.492388	1.51427e-09
18	29855	0.484881	2.90236e-09
19	6482	0.425674	2.93725e-07
19	94	0.394023	2.47213e-06
19	57720	0.386915	3.87321e-06
19	23037	0.373192	8.95147e-06
20	727800	0.624816	7.13485e-16
20	56904	0.594002	3.87355e-14
20	29882	0.582489	1.5489e-13
20	6522	0.562173	1.57145e-12
21	5493	0.526803	6.21704e-11
21	5310	0.500189	7.57347e-10
21	56257	0.493614	1.35967e-09
21	7249	0.493109	1.42141e-09
22	158586	0.613066	3.44486e-15
22	3476	0.556955	2.77869e-12
22	79868	0.522926	9.07054e-11
22	546	0.499904	7.77e-10
23	8449	0.812259	1.06396e-32
23	9277	0.682221	1.12662e-19
23	203068	0.631208	2.94487e-16
23	7005	0.628263	4.43857e-16
24	2051	0.460869	2.0995e-08
24	266977	0.419259	4.60451e-07
24	10103	0.379847	5.99131e-06
24	218	0.378705	6.42256e-06
25	23511	0.650436	1.80957e-17
25	8021	0.62746	4.96015e-16
25	10868	0.606714	7.85512e-15
25	25792	0.591838	5.04754e-14
26	28959	0.604758	1.00879e-14
26	55365	0.522498	9.45356e-11
26	7113	0.459416	2.35518e-08
26	54854	0.446705	6.29327e-08
27	7175	0.57392	4.19665e-13
27	79784	0.525588	7.00186e-11
27	27252	0.512308	2.49175e-10
27	1555	0.510492	2.95158e-10
28	619499	0.592509	4.65096e-14
28	9283	0.591779	5.08396e-14
28	7178	0.561699	1.65565e-12
28	26692	0.555399	3.28736e-12
29	79734	0.497962	9.24645e-10
29	57597	0.45472	3.40218e-08
29	7168	0.428545	2.39479e-07
29	6422	0.426035	2.86317e-07
30	9209	0.594849	3.49042e-14
30	64689	0.583763	1.33228e-13
30	51304	0.532162	3.65881e-11
30	2803	0.507554	3.87365e-10
31	79915	0.483148	3.36521e-09
31	80755	0.473012	7.86691e-09
31	55175	0.459576	2.32563e-08
31	1659	0.415061	6.1487e-07
32	28954	0.388847	3.43183e-06
32	29882	0.386243	4.03909e-06
32	1173	0.385833	4.14338e-06
32	80724	0.377415	6.94536e-06
33	11197	0.480394	4.25042e-09
33	80036	0.453194	3.82949e-08
33	64084	0.405746	1.15198e-06
33	64131	0.39227	2.76444e-06
34	11080	0.705541	1.76857e-21
34	23032	0.682464	1.08112e-19
34	8790	0.679262	1.85698e-19
34	830	0.664686	2.00434e-18
35	5025	0.58427	1.25438e-13
35	51433	0.488766	2.07675e-09
35	57535	0.465745	1.42212e-08
35	65985	0.457433	2.75282e-08
36	64376	0.60232	1.37463e-14
36	56647	0.512436	2.46193e-10
36	2747	0.49438	1.2708e-09
36	38	0.489777	1.9022e-09
37	2314	0.547454	7.65131e-12
37	80279	0.496017	1.0994e-09
37	2874	0.495407	1.16056e-09
37	4335	0.49093	1.72048e-09
38	25996	0.636158	1.46338e-16
38	6392	0.633452	2.14817e-16
38	10179	0.602033	1.42531e-14
38	60496	0.583368	1.39601e-13
43	7287	0.535644	2.57977e-11
43	773	0.520855	1.10768e-10
43	22953	0.513188	2.29458e-10
43	774	0.497701	9.46453e-10
47	6605	0.662136	2.99772e-18
47	1659	0.564482	1.2172e-12
47	28958	0.513415	2.24624e-10
47	2535	0.509751	3.16188e-10
48	10210	0.612856	3.54131e-15
48	4712	0.582562	1.53552e-13
48	55958	0.54525	9.63386e-12
48	10670	0.528429	5.29826e-11
49	54535	0.422595	3.64903e-07
49	7352	0.405414	1.17769e-06
49	353500	0.370413	1.0558e-05
49	11159	0.37019	1.06982e-05
51	2885	0.587116	8.93276e-14
51	1213	0.580302	2.00314e-13
51	51081	0.577249	2.85909e-13
51	6827	0.528889	5.06325e-11
52	1653	0.71388	3.62232e-22
52	1876	0.710223	7.31199e-22
52	10971	0.69752	7.72128e-21
52	23369	0.674773	3.92021e-19
53	57175	0.568749	7.55285e-13
53	65220	0.547937	7.27279e-12
53	6199	0.5379	2.05277e-11
53	10906	0.516193	1.72844e-10
54	7409	0.510969	2.82345e-10
54	23149	0.491209	1.67906e-09
54	5724	0.48262	3.52006e-09
54	23526	0.466008	1.39227e-08
55	6674	0.414873	6.22847e-07
55	9936	0.380362	5.80574e-06
55	6303	0.372016	9.60094e-06
55	81537	0.369572	1.10957e-05
56	930	0.396795	2.06921e-06
56	57626	0.384	4.64242e-06
56	51678	0.361371	1.78782e-05
56	60385	0.358533	2.10228e-05
58	10930	0.557322	2.67051e-12
58	70	0.545877	9.0243e-12
58	47	0.455603	3.17628e-08
58	8642	0.448476	5.50107e-08
59	72	0.659724	4.37101e-18
59	6424	0.626837	5.40517e-16
59	7058	0.604792	1.0044e-14
59	4629	0.603395	1.19969e-14
70	58	0.545877	9.0243e-12
70	10930	0.54308	1.2068e-11
70	79805	0.489352	1.97378e-09
70	4632	0.482585	3.53045e-09
71	2873	0.525473	7.08046e-11
71	79415	0.50694	4.09899e-10
71	26502	0.485864	2.66776e-09
71	3607	0.465572	1.44208e-08
72	59	0.659724	4.37101e-18
72	3779	0.615773	2.41081e-15
72	5350	0.5974	2.54605e-14
72	9060	0.567304	8.88375e-13
81	6829	0.722273	6.93026e-23
81	54623	0.665509	1.75867e-18
81	55095	0.648084	2.5729e-17
81	10298	0.633935	2.00646e-16
86	5984	0.793182	3.21813e-30
86	4711	0.677161	2.63875e-19
86	1894	0.676331	3.02915e-19
86	54165	0.669065	9.94653e-19
87	89	0.737994	2.64156e-24
87	26037	0.635322	1.64816e-16
87	22990	0.603407	1.19776e-14
87	9766	0.598742	2.15442e-14
88	10761	0.380077	5.90781e-06
88	55190	0.374155	8.45084e-06
88	54967	0.371092	1.01422e-05
88	26032	0.362843	1.64269e-05
89	87	0.737994	2.64156e-24
89	26020	0.45322	3.82179e-08
89	9766	0.446528	6.37821e-08
89	10965	0.423907	3.32761e-07
90	26225	0.541744	1.38517e-11
90	4780	0.527898	5.58253e-11
90	79568	0.506059	4.44409e-10
90	29081	0.498996	8.4294e-10
91	27201	0.637424	1.22121e-16
91	27023	0.605307	9.40592e-15
91	51289	0.60164	1.49781e-14
91	8433	0.597798	2.4233e-14
92	8886	0.561949	1.61077e-12
92	10314	0.557121	2.72938e-12
92	5433	0.5347	2.83731e-11
92	100526832	0.53341	3.2296e-11
93	7155	0.516068	1.74914e-10
93	9880	0.504741	5.0135e-10
93	9943	0.496308	1.0714e-09
93	23132	0.493328	1.39433e-09
94	3678	0.500881	7.11588e-10
94	5159	0.483011	3.40481e-09
94	2828	0.472399	8.27449e-09
94	23452	0.467354	1.24889e-08
95	9136	0.657146	6.51709e-18
95	24142	0.62074	1.24112e-15
95	25864	0.61523	2.59059e-15
95	51409	0.550039	5.82667e-12
97	5826	0.520913	1.10148e-10
97	23093	0.467959	1.18914e-08
97	51004	0.463313	1.72851e-08
97	9556	0.45751	2.73631e-08
98	112869	0.569131	7.2338e-13
98	1716	0.563948	1.2915e-12
98	79833	0.524795	7.56489e-11
98	9391	0.501162	6.9376e-10
100	54498	0.489573	1.93623e-09
100	4017	0.447085	6.11441e-08
100	1789	0.420426	4.24591e-07
100	387522	0.401503	1.5239e-06
101	23601	0.543682	1.13384e-11
101	8764	0.521195	1.07207e-10
101	3689	0.51435	2.0572e-10
101	4688	0.50713	4.02796e-10
102	5049	0.53266	3.48138e-11
102	10116	0.49758	9.56714e-10
102	51701	0.481576	3.8461e-09
102	996	0.481185	3.97543e-09
103	6772	0.490908	1.72375e-09
103	23512	0.480356	4.26408e-09
103	50848	0.472005	8.54697e-09
103	9320	0.45967	2.30851e-08
104	5116	0.564752	1.18119e-12
104	5822	0.519464	1.26584e-10
104	4047	0.515854	1.7849e-10
104	754	0.510405	2.9756e-10
105	10077	0.44975	4.99119e-08
105	482	0.417851	5.0757e-07
105	29125	0.406352	1.10649e-06
105	56981	0.381726	5.3406e-06
107	3697	0.713173	4.15328e-22
107	5345	0.711605	5.61475e-22
107	8328	0.711432	5.80365e-22
107	7448	0.709261	8.77984e-22
108	182	0.399594	1.72605e-06
108	6699	0.376864	7.18049e-06
108	27324	0.370082	1.07668e-05
108	1641	0.369843	1.09197e-05
109	56829	0.420611	4.19169e-07
109	3614	0.380182	5.86988e-06
109	2176	0.371291	1.00232e-05
109	79850	0.366399	1.33652e-05
112	5900	0.472869	7.96036e-09
112	9730	0.414189	6.52627e-07
112	57572	0.402375	1.4392e-06
112	8314	0.399108	1.78151e-06
113	79918	0.404985	1.21159e-06
113	64127	0.402829	1.39688e-06
113	29117	0.365951	1.37188e-05
113	55715	0.362904	1.63687e-05
114	312	0.490863	1.73042e-09
114	5621	0.477965	5.21315e-09
114	4056	0.466415	1.34731e-08
114	81855	0.465949	1.39895e-08
115	21	0.450884	4.57586e-08
115	3131	0.426125	2.845e-07
115	9423	0.411421	7.87593e-07
115	7148	0.410701	8.26866e-07
116	6855	0.634346	1.89318e-16
116	78997	0.591697	5.13521e-14
116	23025	0.588732	7.35474e-14
116	1141	0.579274	2.25899e-13
117	4146	0.455327	3.24518e-08
117	482	0.390905	3.01418e-06
117	3067	0.370429	1.05478e-05
117	4023	0.360999	1.82629e-05
118	100126332	0.750447	1.67355e-25
118	6002	0.663686	2.34829e-18
118	6047	0.633579	2.10991e-16
118	7468	0.588596	7.47697e-14
119	55506	0.411493	7.83766e-07
119	79905	0.407223	1.04414e-06
119	3099	0.406209	1.11708e-06
119	60509	0.390541	3.08443e-06
120	10285	0.576154	3.24514e-13
120	7511	0.564284	1.24425e-12
120	8036	0.500627	7.28067e-10
120	5501	0.487245	2.36868e-09
124	125	0.829498	3.37762e-35
124	54829	0.478041	5.17997e-09
124	1359	0.477788	5.29117e-09
124	2167	0.477341	5.49278e-09
125	124	0.829498	3.37762e-35
125	2167	0.628666	4.19746e-16
125	9370	0.545408	9.47632e-12
125	54829	0.526502	6.40274e-11
128	51138	0.742677	9.53564e-25
128	1977	0.711106	6.17789e-22
128	23173	0.704812	2.02622e-21
128	57117	0.657195	6.46762e-18
130	9402	0.658165	5.56761e-18
130	7404	0.636471	1.39944e-16
130	2243	0.624386	7.56677e-16
130	319	0.607214	7.36662e-15
131	5367	0.337875	6.53486e-05
131	55670	0.332012	8.88906e-05
131	1943	0.31394	0.000220835
131	26239	0.31299	0.000231285
132	310	0.52387	8.2768e-11
132	10556	0.496587	1.04511e-09
132	9446	0.492964	1.43967e-09
132	51068	0.488528	2.12016e-09
133	54541	0.567211	8.97674e-13
133	30001	0.513177	2.29695e-10
133	664	0.511431	2.70424e-10
133	5163	0.507579	3.86472e-10
134	57175	0.456026	3.07312e-08
134	30008	0.450077	4.86791e-08
134	4240	0.443194	8.19853e-08
134	79777	0.441599	9.23593e-08
135	6663	0.790111	7.63063e-30
135	5345	0.779454	1.37022e-28
135	23046	0.772786	7.70231e-28
135	29948	0.761529	1.24831e-26
140	8477	0.815567	3.69793e-33
140	4481	0.799098	5.84699e-31
140	713	0.784202	3.86204e-29
140	241	0.766088	4.11672e-27
141	283537	0.49661	1.04301e-09
141	29113	0.469332	1.06356e-08
141	3549	0.417654	5.14528e-07
141	100528030	0.41746	5.2146e-07
142	79169	0.662028	3.04881e-18
142	1063	0.576223	3.21933e-13
142	57645	0.533929	3.06597e-11
142	9877	0.526733	6.25986e-11
143	221154	0.598814	2.13507e-14
143	11215	0.537321	2.17698e-11
143	55835	0.527828	5.62109e-11
143	10240	0.527489	5.81167e-11
146	64837	0.730785	1.21577e-23
146	6369	0.668734	1.04919e-18
146	5540	0.664113	2.19474e-18
146	79748	0.660491	3.87841e-18
147	3909	0.583898	1.31103e-13
147	8436	0.555491	3.25508e-12
147	5493	0.488276	2.1668e-09
147	9569	0.487469	2.32333e-09
148	3446	0.414859	6.23417e-07
148	80350	0.371785	9.73374e-06
148	26211	0.365008	1.44925e-05
148	4842	0.361706	1.75376e-05
150	7168	0.492941	1.44252e-09
150	6422	0.492566	1.49085e-09
150	11030	0.481553	3.85366e-09
150	9060	0.465206	1.48514e-08
151	1464	0.427163	2.64271e-07
151	55700	0.411955	7.59639e-07
151	79865	0.407195	1.04611e-06
151	4171	0.395318	2.2755e-06
152	25924	0.45032	4.77805e-08
152	60312	0.436801	1.31704e-07
152	4661	0.3822	5.18707e-06
152	3934	0.378609	6.45997e-06
153	2253	0.567754	8.44663e-13
153	170680	0.546177	8.74554e-12
153	64600	0.544667	1.02368e-11
153	4992	0.50406	5.33505e-10
154	9754	0.412449	7.34626e-07
154	3363	0.406183	1.11905e-06
154	60468	0.404142	1.28105e-06
154	1286	0.396822	2.06559e-06
155	3891	0.544269	1.06686e-11
155	9283	0.518613	1.37312e-10
155	2797	0.509682	3.18205e-10
155	1395	0.494327	1.27679e-09
156	1445	0.490179	1.83677e-09
156	4209	0.485052	2.86022e-09
156	55262	0.481225	3.96215e-09
156	5871	0.478877	4.82951e-09
157	5126	0.407594	1.01858e-06
157	2263	0.379252	6.2122e-06
157	91851	0.376897	7.16623e-06
157	89781	0.370444	1.05386e-05
158	6767	0.646969	3.03681e-17
158	4733	0.591257	5.41751e-14
158	10478	0.588237	7.80749e-14
158	25828	0.575976	3.31249e-13
159	9804	0.593337	4.20297e-14
159	64216	0.568937	7.39396e-13
159	7257	0.531775	3.80299e-11
159	10638	0.524125	8.07428e-11
161	6888	0.642615	5.76414e-17
161	60626	0.610389	4.88663e-15
161	79751	0.589793	6.47071e-14
161	4928	0.571081	5.80161e-13
162	2130	0.690636	2.63297e-20
162	23481	0.656493	7.20529e-18
162	84861	0.656103	7.65115e-18
162	9463	0.647222	2.92486e-17
163	23512	0.5042	5.26704e-10
163	28511	0.468169	1.16905e-08
163	1267	0.448334	5.56068e-08
163	4642	0.439946	1.04437e-07
164	51388	0.635857	1.52734e-16
164	1723	0.621641	1.09895e-15
164	55794	0.600781	1.66876e-14
164	7084	0.599402	1.9837e-14
165	1292	0.696308	9.60692e-21
165	1289	0.679491	1.7869e-19
165	1277	0.639507	9.05066e-17
165	1290	0.613278	3.35019e-15
166	2767	0.577654	2.7277e-13
166	7089	0.560105	1.97207e-12
166	10362	0.554774	3.51619e-12
166	6794	0.519326	1.28264e-10
167	206358	0.354823	2.59245e-05
167	57135	0.348757	3.63134e-05
167	7201	0.332067	8.86342e-05
167	23040	0.307043	0.000307913
173	3174	0.464613	1.55759e-08
173	55195	0.449406	5.12415e-08
173	2863	0.44361	7.94689e-08
173	7429	0.441643	9.20604e-08
174	7018	0.656534	7.1602e-18
174	2266	0.649093	2.21323e-17
174	350	0.64735	2.86978e-17
174	213	0.643838	4.82005e-17
175	60559	0.494221	1.28879e-09
175	2585	0.447498	5.92578e-08
175	25936	0.435156	1.48556e-07
175	55916	0.434554	1.55223e-07
176	10631	0.560083	1.97676e-12
176	8038	0.549218	6.35464e-12
176	50509	0.541493	1.42145e-11
176	25903	0.525917	6.78026e-11
177	3083	0.530361	4.3768e-11
177	10307	0.519888	1.21544e-10
177	10817	0.500737	7.20853e-10
177	1822	0.492509	1.49835e-09
178	54482	0.622749	9.45683e-16
178	25950	0.620427	1.29456e-15
178	1629	0.617061	2.03169e-15
178	8556	0.610221	4.99457e-15
181	6161	0.495289	1.17274e-09
181	2876	0.462997	1.77259e-08
181	100528032	0.455387	3.23021e-08
181	64600	0.454231	3.53377e-08
182	23462	0.438089	1.19805e-07
182	4851	0.430259	2.1179e-07
182	27253	0.423893	3.33101e-07
182	3280	0.420042	4.36098e-07
183	81621	0.466267	1.36358e-08
183	2152	0.400224	1.65665e-06
183	2859	0.398619	1.83892e-06
183	79870	0.375998	7.56567e-06
185	443	0.563741	1.32147e-12
185	10930	0.548633	6.75933e-12
185	4604	0.529511	4.76131e-11
185	54829	0.51529	1.88262e-10
186	51384	0.523585	8.50876e-11
186	4760	0.483844	3.17157e-09
186	9607	0.455824	3.122e-08
186	22865	0.388253	3.56215e-06
189	6822	0.741968	1.11415e-24
189	2243	0.711642	5.57435e-22
189	4224	0.684326	7.86791e-20
189	440387	0.631894	2.675e-16
190	5985	0.432856	1.75603e-07
190	9480	0.416515	5.56521e-07
190	55901	0.399367	1.7518e-06
190	18	0.379641	6.06675e-06
191	51507	0.54699	8.03214e-12
191	51654	0.542692	1.25614e-11
191	7165	0.542483	1.28348e-11
191	22913	0.538251	1.98076e-11
196	11221	0.445867	6.70517e-08
196	4261	0.412683	7.23055e-07
196	214	0.406604	1.08812e-06
196	79098	0.389974	3.19687e-06
197	3050	0.74335	8.22156e-25
197	3046	0.716836	2.03693e-22
197	7031	0.664681	2.00587e-18
197	3695	0.631985	2.64099e-16
199	963	0.9039	1.58556e-50
199	1536	0.895123	3.77676e-48
199	3937	0.886752	4.52284e-46
199	5341	0.875141	1.9132e-43
202	10973	0.466752	1.3112e-08
202	11221	0.427225	2.63117e-07
202	2309	0.420718	4.16041e-07
202	30850	0.410003	8.66705e-07
203	51117	0.519279	1.28845e-10
203	1384	0.479419	4.61429e-09
203	140459	0.473578	7.50807e-09
203	2356	0.471022	9.26479e-09
204	64766	0.579429	2.21851e-13
204	8668	0.518961	1.32821e-10
204	8073	0.486147	2.60377e-09
204	9204	0.470709	9.50523e-09
207	23241	0.68462	7.48162e-20
207	9112	0.643983	4.71848e-17
207	3831	0.642377	5.96795e-17
207	4140	0.634088	1.9634e-16
208	5704	0.706286	1.53843e-21
208	2091	0.624124	7.84246e-16
208	79934	0.610935	4.55188e-15
208	55095	0.576469	3.12901e-13
210	81932	0.570144	6.45153e-13
210	5774	0.503787	5.469e-10
210	1317	0.450468	4.72393e-08
210	10558	0.437017	1.29631e-07
211	8314	0.65244	1.33738e-17
211	11344	0.650394	1.82113e-17
211	93973	0.471059	9.23615e-09
211	80335	0.466653	1.32166e-08
212	336	0.640731	7.58219e-17
212	3046	0.640255	8.12292e-17
212	3050	0.596338	2.90462e-14
212	3053	0.593232	4.25731e-14
213	350	0.666476	1.50728e-18
213	2266	0.650193	1.877e-17
213	174	0.643838	4.82005e-17
213	2243	0.611028	4.49667e-15
214	196	0.406604	1.08812e-06
214	6769	0.397479	1.97985e-06
214	3958	0.390919	3.01165e-06
214	3248	0.373215	8.93915e-06
215	7517	0.521469	1.04407e-10
215	6901	0.504745	5.01206e-10
215	8517	0.498528	8.78984e-10
215	2539	0.492193	1.54044e-09
216	9452	0.445094	7.10812e-08
216	51365	0.421066	4.06086e-07
216	2628	0.401726	1.50173e-06
216	9060	0.38825	3.5629e-06
217	1808	0.42988	2.17639e-07
217	7188	0.406895	1.06725e-06
217	8513	0.388128	3.59011e-06
217	4239	0.376043	7.54495e-06
218	79148	0.454761	3.39133e-08
218	224	0.450966	4.54691e-08
218	3691	0.43599	1.39772e-07
218	4056	0.433551	1.66967e-07
219	65083	0.581553	1.7295e-13
219	30968	0.470714	9.50128e-09
219	5986	0.461812	1.94812e-08
219	51490	0.445698	6.79135e-08
220	9945	0.38038	5.79933e-06
220	4837	0.377591	6.8717e-06
220	3624	0.367972	1.21899e-05
220	1296	0.367631	1.24366e-05
222	9641	0.57918	2.28395e-13
222	27134	0.57077	6.01015e-13
222	63898	0.464437	1.57967e-08
222	56649	0.450918	4.56376e-08
223	23705	0.430938	2.01695e-07
223	22920	0.421567	3.92103e-07
223	5931	0.411873	7.63869e-07
223	9926	0.403614	1.32652e-06
224	54902	0.468488	1.13914e-08
224	218	0.450966	4.54691e-08
224	2314	0.438472	1.16463e-07
224	140461	0.415968	5.7784e-07
225	4068	0.483759	3.19454e-09
225	8287	0.44067	9.89751e-08
225	57135	0.433539	1.67118e-07
225	270	0.433047	1.73195e-07
226	7284	0.594792	3.51523e-14
226	10295	0.580774	1.89514e-13
226	23214	0.566082	1.01861e-12
226	9739	0.564088	1.27155e-12
229	337	0.537924	2.04767e-11
229	255057	0.505401	4.72022e-10
229	4640	0.504706	5.02972e-10
229	9635	0.500517	7.35333e-10
230	336	0.495825	1.1183e-09
230	22983	0.464673	1.55009e-08
230	433	0.460474	2.16635e-08
230	1443	0.459192	2.39733e-08
231	51646	0.487228	2.37229e-09
231	2281	0.481148	3.9878e-09
231	90957	0.43763	1.23919e-07
231	10540	0.432347	1.82192e-07
238	25878	0.448522	5.48167e-08
238	22884	0.399588	1.7268e-06
238	716	0.39698	2.0447e-06
238	10584	0.392029	2.80702e-06
239	7350	0.366792	1.30623e-05
239	55117	0.360784	1.84898e-05
239	23098	0.358892	2.05988e-05
239	2015	0.351519	3.11737e-05
240	7462	0.554738	3.52972e-12
240	718	0.547708	7.44993e-12
240	54518	0.545949	8.95671e-12
240	1536	0.518642	1.36935e-10
241	963	0.846124	6.8953e-38
241	4332	0.811056	1.55464e-32
241	2213	0.805931	7.58943e-32
241	719	0.798827	6.3309e-31
242	6425	0.495992	1.10187e-09
242	7053	0.403935	1.29871e-06
242	3713	0.382728	5.02152e-06
242	765	0.373288	8.90044e-06
246	3697	0.528345	5.3424e-11
246	566	0.514689	1.99248e-10
246	1048	0.509296	3.29816e-10
246	222487	0.506505	4.2662e-10
247	146754	0.461267	2.03427e-08
247	778	0.391561	2.8916e-06
247	4277	0.369803	1.09457e-05
247	10331	0.368238	1.20016e-05
248	251	0.560014	1.99177e-12
248	250	0.485156	2.83482e-09
248	3594	0.43937	1.08988e-07
248	553	0.408207	9.7771e-07
249	10461	0.455072	3.3102e-08
249	10048	0.393396	2.57312e-06
249	10675	0.366906	1.29754e-05
249	1832	0.356609	2.34445e-05
250	251	0.667816	1.21616e-18
250	248	0.485156	2.83482e-09
250	4585	0.475831	6.22966e-09
250	3625	0.474227	7.11606e-09
251	250	0.667816	1.21616e-18
251	248	0.560014	1.99177e-12
251	2037	0.411836	7.65812e-07
251	5775	0.404487	1.25221e-06
257	1482	0.432593	1.78987e-07
257	79710	0.417789	5.09763e-07
257	3777	0.409621	8.89227e-07
257	3713	0.406548	1.09215e-06
258	3697	0.718828	1.37642e-22
258	5225	0.661119	3.51596e-18
258	222487	0.623251	8.83289e-16
258	5313	0.616782	2.10855e-15
259	3698	0.666553	1.48878e-18
259	1358	0.635331	1.64621e-16
259	5005	0.630229	3.37669e-16
259	345	0.62682	5.41799e-16
262	8763	0.661242	3.44877e-18
262	8726	0.551379	5.05437e-12
262	53371	0.548576	6.80005e-12
262	5980	0.542954	1.22263e-11
265	266	0.639955	8.48401e-17
265	63973	0.471955	8.58232e-09
265	8600	0.425687	2.93456e-07
265	51066	0.418708	4.78383e-07
266	265	0.639955	8.48401e-17
266	63973	0.410582	8.33522e-07
266	57093	0.369824	1.09321e-05
266	4242	0.359554	1.98355e-05
267	55715	0.365843	1.38051e-05
267	4054	0.359737	1.96305e-05
267	8717	0.351875	3.05635e-05
267	30008	0.34945	3.49537e-05
268	3004	0.607885	6.75702e-15
268	23400	0.594994	3.4289e-14
268	171558	0.583458	1.38123e-13
268	6663	0.545622	9.26721e-12
269	725	0.544599	1.03085e-11
269	2940	0.52412	8.07864e-11
269	933	0.516958	1.60759e-10
269	4099	0.492498	1.49982e-09
270	608	0.789697	8.56512e-30
270	54900	0.770624	1.33136e-27
270	79368	0.754274	6.93488e-26
270	3887	0.697549	7.68027e-21
271	23466	0.488196	2.18199e-09
271	26012	0.481933	3.73131e-09
271	2946	0.474391	7.02014e-09
271	1454	0.450833	4.59357e-08
272	81537	0.488705	2.08774e-09
272	6737	0.467218	1.26266e-08
272	51131	0.466337	1.35587e-08
272	3965	0.439542	1.07611e-07
273	22843	0.443057	8.28291e-08
273	3753	0.400536	1.62331e-06
273	7225	0.38986	3.2199e-06
273	51203	0.385889	4.12901e-06
274	6539	0.486541	2.51689e-09
274	1509	0.457308	2.77993e-08
274	7791	0.421243	4.01092e-07
274	6483	0.42084	4.12539e-07
275	55282	0.484757	2.93343e-09
275	51409	0.483055	3.39215e-09
275	8292	0.451679	4.30452e-08
275	2796	0.443906	7.77203e-08
279	4345	0.513752	2.17619e-10
279	5016	0.498414	8.87987e-10
279	10610	0.486247	2.5814e-09
279	1356	0.447995	5.70616e-08
283	6038	0.84765	3.7651e-38
283	51550	0.439928	1.04577e-07
283	5836	0.438189	1.18923e-07
283	30813	0.424627	3.16305e-07
284	5137	0.532549	3.5203e-11
284	3082	0.496102	1.0912e-09
284	9378	0.477219	5.54874e-09
284	7035	0.468187	1.16733e-08
285	11082	0.727766	2.27081e-23
285	80177	0.494375	1.27136e-09
285	2828	0.48988	1.88533e-09
285	2321	0.4767	5.79439e-09
286	51512	0.411338	7.92049e-07
286	6253	0.376085	7.52596e-06
286	84296	0.36847	1.1839e-05
286	1412	0.364038	1.53312e-05
287	1420	0.461369	2.01792e-08
287	50804	0.443112	8.24914e-08
287	63971	0.437285	1.27102e-07
287	9990	0.433162	1.71756e-07
288	9901	0.455335	3.24327e-08
288	64097	0.424069	3.28989e-07
288	582	0.418167	4.9664e-07
288	6327	0.418063	5.00188e-07
290	26659	0.43747	1.25389e-07
290	9573	0.419976	4.38093e-07
290	53947	0.401314	1.54284e-06
290	4250	0.373468	8.80512e-06
291	836	0.675882	3.26348e-19
291	54969	0.618724	1.62738e-15
291	3622	0.601766	1.47405e-14
291	1635	0.581195	1.80383e-13
292	28985	0.686595	5.32405e-20
292	7411	0.632894	2.32387e-16
292	10009	0.604862	9.95535e-15
292	5716	0.596388	2.88642e-14
301	6277	0.406723	1.07952e-06
301	79413	0.396994	2.04283e-06
301	9982	0.392605	2.70605e-06
301	3883	0.390786	3.03698e-06
302	1410	0.461737	1.95969e-08
302	6281	0.445374	6.95961e-08
302	30008	0.421993	3.80596e-07
302	5328	0.421763	3.86779e-07
306	51510	0.484243	3.06525e-09
306	3033	0.414579	6.35471e-07
306	30968	0.407851	1.00126e-06
306	5805	0.384783	4.42266e-06
307	3964	0.462391	1.86037e-08
307	8560	0.434348	1.57567e-07
307	23424	0.423122	3.51654e-07
307	30001	0.414915	6.21045e-07
308	10769	0.411116	8.04003e-07
308	302	0.401896	1.48516e-06
308	9871	0.388157	3.58361e-06
308	1843	0.379603	6.08103e-06
309	2318	0.437441	1.25651e-07
309	2014	0.392063	2.80089e-06
309	271	0.387869	3.64894e-06
309	5118	0.38599	4.10306e-06
310	56681	0.539296	1.78046e-11
310	29982	0.532485	3.54285e-11
310	11319	0.527951	5.55391e-11
310	8034	0.527268	5.93962e-11
311	55753	0.546288	8.64497e-12
311	54438	0.544911	9.98025e-12
311	8030	0.536631	2.3349e-11
311	54788	0.525308	7.19586e-11
312	4056	0.519786	1.22738e-10
312	366	0.516546	1.67165e-10
312	114	0.490863	1.73042e-09
312	5621	0.486091	2.6162e-09
313	963	0.70019	4.75316e-21
313	719	0.698078	6.98028e-21
313	8477	0.697628	7.5717e-21
313	51338	0.689863	3.01491e-20
314	7975	0.583001	1.45803e-13
314	148066	0.565717	1.06088e-12
314	6360	0.551894	4.78501e-12
314	26103	0.541565	1.41089e-11
316	1114	0.421676	3.89135e-07
316	2202	0.402602	1.41786e-06
316	4741	0.395374	2.26732e-06
316	23301	0.375827	7.64387e-06
317	841	0.495612	1.13959e-09
317	54797	0.49411	1.30152e-09
317	22834	0.479526	4.57291e-09
317	11108	0.401921	1.48267e-06
318	11258	0.550518	5.53817e-12
318	10488	0.5209	1.10286e-10
318	55848	0.51416	2.09422e-10
318	54840	0.502573	6.10632e-10
319	9402	0.73321	7.31463e-24
319	23495	0.667688	1.24136e-18
319	6906	0.662064	3.03193e-18
319	932	0.661527	3.29851e-18
320	6812	0.414091	6.56987e-07
320	55690	0.350262	3.34227e-05
320	640	0.343174	4.92231e-05
320	51195	0.332882	8.49548e-05
321	6664	0.43838	1.17258e-07
321	55506	0.409146	9.18067e-07
321	55733	0.40496	1.21361e-06
321	4355	0.39107	2.98302e-06
322	64427	0.492359	1.51818e-09
322	7041	0.49049	1.78777e-09
322	10322	0.483898	3.15694e-09
322	649	0.471733	8.73984e-09
323	3815	0.482491	3.55863e-09
323	3912	0.418163	4.96751e-07
323	8642	0.417832	5.08235e-07
323	590	0.404406	1.25895e-06
324	5921	0.616848	2.09027e-15
324	9879	0.587586	8.44244e-14
324	9867	0.571787	5.35417e-13
324	1105	0.562577	1.50291e-12
325	10368	0.476392	5.94527e-09
325	442194	0.451393	4.40018e-08
325	2912	0.45095	4.55269e-08
325	2587	0.42879	2.35317e-07
326	5030	0.820797	6.6532e-34
326	8433	0.786837	1.88582e-29
326	340351	0.772287	8.74505e-28
326	774	0.756417	4.20541e-26
327	55152	0.645575	3.73259e-17
327	51304	0.557157	2.71872e-12
327	5859	0.523198	8.83461e-11
327	11070	0.502356	6.22808e-10
328	10038	0.653275	1.1784e-17
328	56339	0.640082	8.32965e-17
328	10419	0.631984	2.64148e-16
328	57820	0.579048	2.31935e-13
329	114908	0.66729	1.32321e-18
329	10179	0.649686	2.0251e-17
329	60496	0.617794	1.84269e-15
329	5962	0.582029	1.63522e-13
330	5920	0.572072	5.18314e-13
330	51703	0.55275	4.36781e-12
330	5698	0.549809	5.96981e-12
330	972	0.54437	1.05578e-11
332	890	0.720699	9.49288e-23
332	24137	0.718218	1.55233e-22
332	1058	0.71781	1.68234e-22
332	9833	0.691395	2.30359e-20
333	4868	0.552458	4.50613e-12
333	2261	0.538275	1.97587e-11
333	8193	0.505685	4.59903e-10
333	284403	0.462303	1.87349e-08
334	6734	0.559454	2.11746e-12
334	4798	0.537162	2.21246e-11
334	9538	0.531546	3.89067e-11
334	6768	0.517416	1.5391e-10
335	10089	0.508519	3.54367e-10
335	6676	0.459919	2.26361e-08
335	1608	0.453664	3.69281e-08
335	745	0.450115	4.85354e-08
336	4990	0.698513	6.45034e-21
336	58510	0.697765	7.3869e-21
336	6005	0.69768	7.50067e-21
336	9032	0.689564	3.17693e-20
337	10661	0.744082	6.99407e-25
337	10864	0.651277	1.59449e-17
337	58510	0.651271	1.59596e-17
337	486	0.648354	2.47161e-17
338	7018	0.581248	1.79255e-13
338	213	0.566215	1.0036e-12
338	2266	0.530591	4.27825e-11
338	345	0.468377	1.14952e-08
339	10716	0.384206	4.58365e-06
339	26659	0.314752	0.00021224
339	50617	0.309411	0.000274954
339	30837	0.29759	0.000479351
341	7940	0.672657	5.54912e-19
341	9535	0.671916	6.26401e-19
341	199	0.653691	1.10607e-17
341	2207	0.642905	5.52519e-17
343	4224	0.613543	3.23551e-15
343	51208	0.589108	7.02904e-14
343	189	0.543363	1.1719e-11
343	5267	0.535801	2.53909e-11
344	3697	0.67464	4.00705e-19
344	6663	0.668736	1.04888e-18
344	3004	0.662895	2.66045e-18
344	3561	0.640729	7.58401e-17
345	9032	0.75422	7.02365e-26
345	2147	0.733717	6.57362e-24
345	3053	0.714478	3.22624e-22
345	7018	0.703069	2.80021e-21
346	1414	0.488396	2.14454e-09
346	733	0.418701	4.78598e-07
346	1469	0.415995	5.76742e-07
346	3792	0.406852	1.07032e-06
347	23460	0.552944	4.27806e-12
347	114897	0.518792	1.34989e-10
347	10351	0.515612	1.82612e-10
347	1240	0.510539	2.93873e-10
348	341	0.558598	2.32472e-12
348	7077	0.422867	3.58011e-07
348	51393	0.402392	1.43757e-06
348	10859	0.402095	1.46585e-06
350	213	0.666476	1.50728e-18
350	174	0.64735	2.86978e-17
350	5267	0.627669	4.81855e-16
350	2266	0.585493	1.08457e-13
351	3915	0.439075	1.11391e-07
351	8148	0.423378	3.45385e-07
351	23677	0.396478	2.11193e-06
351	4001	0.396466	2.11362e-06
353	51693	0.71205	5.15477e-22
353	1327	0.6479	2.6445e-17
353	1723	0.565546	1.08134e-12
353	1535	0.561772	1.64243e-12
354	23396	0.735271	4.7299e-24
354	8175	0.728888	1.80229e-23
354	83482	0.728172	2.08908e-23
354	7148	0.725052	3.95395e-23
355	90627	0.418115	4.98394e-07
355	5728	0.411511	7.82836e-07
355	395	0.401538	1.52042e-06
355	79901	0.397343	1.99729e-06
356	30009	0.851355	8.42763e-39
356	914	0.811067	1.54908e-32
356	6352	0.806342	6.69359e-32
356	3560	0.802572	2.09126e-31
357	4935	0.700983	4.1114e-21
357	55841	0.503184	5.77716e-10
357	80206	0.493848	1.33192e-09
357	8239	0.430936	2.01728e-07
358	2191	0.536953	2.25992e-11
358	1513	0.516427	1.69061e-10
358	1290	0.50938	3.27252e-10
358	165	0.49887	8.52536e-10
359	10052	0.610799	4.6332e-15
359	5540	0.599953	1.85142e-14
359	3891	0.584474	1.22442e-13
359	8941	0.58394	1.30449e-13
360	653499	0.413724	6.73638e-07
360	64222	0.392161	2.78363e-06
360	1660	0.373335	8.87552e-06
360	3872	0.372755	9.18775e-06
361	22865	0.387143	3.81843e-06
361	5495	0.381899	5.28407e-06
361	1825	0.381107	5.54708e-06
361	8050	0.380679	5.69436e-06
362	363	0.594759	3.52968e-14
362	64321	0.505793	4.55388e-10
362	3856	0.415823	5.83584e-07
362	53826	0.409811	8.77984e-07
363	362	0.594759	3.52968e-14
363	3480	0.424308	3.23502e-07
363	6517	0.421498	3.94019e-07
363	53826	0.401603	1.51386e-06
366	312	0.516546	1.67165e-10
366	1234	0.473773	7.38839e-09
366	23601	0.462927	1.78249e-08
366	11314	0.46181	1.94839e-08
367	2099	0.670476	7.91655e-19
367	7869	0.514059	2.11419e-10
367	4609	0.490601	1.77053e-09
367	4345	0.484133	3.0942e-09
368	5267	0.454386	3.49166e-08
368	1369	0.452958	3.89996e-08
368	7429	0.429641	2.21401e-07
368	1852	0.419306	4.58966e-07
369	2002	0.719867	1.12031e-22
369	28952	0.559077	2.20658e-12
369	1018	0.546758	8.2303e-12
369	90121	0.544912	9.97886e-12
372	1798	0.624587	7.36155e-16
372	23187	0.545004	9.88421e-12
372	9183	0.513175	2.29738e-10
372	10413	0.510542	2.93795e-10
373	64924	0.660156	4.08669e-18
373	23398	0.625135	6.82988e-16
373	9765	0.614563	2.82894e-15
373	79810	0.606691	7.87836e-15
377	60673	0.549465	6.1912e-12
377	80228	0.54236	1.2999e-11
377	11226	0.530656	4.25077e-11
377	5869	0.513742	2.17815e-10
378	9861	0.621404	1.13465e-15
378	5162	0.562978	1.43793e-12
378	28972	0.539412	1.7595e-11
378	11102	0.538831	1.86704e-11
379	2766	0.518824	1.34575e-10
379	10610	0.495173	1.1848e-09
379	79083	0.463557	1.695e-08
379	6523	0.454742	3.39648e-08
381	2783	0.574657	3.85585e-13
381	2002	0.537761	2.0819e-11
381	23608	0.518894	1.33681e-10
381	10922	0.517166	1.57611e-10
382	55030	0.510436	2.96681e-10
382	6655	0.458796	2.47332e-08
382	79944	0.442616	8.56079e-08
382	4534	0.440323	1.01557e-07
383	6708	0.515778	1.79772e-10
383	9402	0.47395	7.28085e-09
383	58498	0.465052	1.50359e-08
383	27290	0.458424	2.5468e-08
384	5283	0.503621	5.55212e-10
384	10668	0.456875	2.87587e-08
384	1407	0.447977	5.71398e-08
384	347733	0.447727	5.82379e-08
387	830	0.654738	9.43031e-18
387	10179	0.628618	4.22511e-16
387	2935	0.604979	9.80739e-15
387	58533	0.603512	1.18198e-14
388	1843	0.404827	1.22433e-06
388	5878	0.39764	1.95931e-06
388	1844	0.388925	3.41502e-06
388	1593	0.385325	4.27638e-06
389	4893	0.516092	1.74516e-10
389	10390	0.487522	2.31284e-09
389	5686	0.48604	2.62782e-09
389	6301	0.484313	3.04691e-09
390	7481	0.524883	7.49998e-11
390	595	0.427461	2.58728e-07
390	3491	0.425761	2.91921e-07
390	10769	0.421911	3.82804e-07
391	3611	0.620617	1.26193e-15
391	79751	0.584539	1.21505e-13
391	6881	0.564575	1.20473e-12
391	3060	0.537336	2.1738e-11
392	1408	0.568199	8.0348e-13
392	51317	0.536964	2.25729e-11
392	23013	0.481194	3.97254e-09
392	6050	0.476297	5.99243e-09
393	55793	0.437842	1.21997e-07
393	58190	0.420692	4.16813e-07
393	10654	0.412291	7.42544e-07
393	26784	0.409747	8.8175e-07
394	80224	0.682351	1.10201e-19
394	29966	0.625207	6.76229e-16
394	23256	0.623024	9.10923e-16
394	5926	0.609509	5.47766e-15
395	23194	0.442144	8.86844e-08
395	27303	0.424856	3.11219e-07
395	1842	0.421435	3.95738e-07
395	4208	0.415248	6.0707e-07
396	6182	0.658601	5.20386e-18
396	79415	0.638384	1.06402e-16
396	2873	0.636587	1.37641e-16
396	64118	0.628003	4.60143e-16
397	2210	0.66047	3.89106e-18
397	7805	0.653805	1.08716e-17
397	929	0.65014	1.89199e-17
397	199	0.644862	4.14651e-17
398	1572	0.621639	1.09925e-15
398	916	0.544561	1.03495e-11
398	8786	0.533718	3.1313e-11
398	7448	0.513761	2.1744e-10
399	914	0.694437	1.34301e-20
399	729230	0.6933	1.64437e-20
399	57823	0.678985	1.94554e-19
399	29909	0.669411	9.40721e-19
400	55681	0.674958	3.80193e-19
400	79023	0.671978	6.20095e-19
400	28977	0.629057	3.97558e-16
400	10988	0.61845	1.68801e-15
401	8484	0.971584	1.76252e-84
401	54345	0.969732	1.07076e-82
401	387509	0.966968	3.12821e-80
401	5455	0.959663	1.31427e-74
402	9049	0.563404	1.37168e-12
402	23625	0.557538	2.60869e-12
402	9158	0.549239	6.34083e-12
402	79094	0.545041	9.84554e-12
403	79004	0.515128	1.91169e-10
403	26123	0.464555	1.56485e-08
403	8505	0.448807	5.36404e-08
403	79009	0.445681	6.79999e-08
405	9869	0.59946	1.96941e-14
405	9191	0.522225	9.70621e-11
405	6944	0.52139	1.05203e-10
405	55204	0.520319	1.16625e-10
406	5214	0.438504	1.16194e-07
406	9867	0.423342	3.46248e-07
406	5627	0.421348	3.98152e-07
406	56674	0.419791	4.43759e-07
407	5075	0.642109	6.20563e-17
407	6169	0.61917	1.53285e-15
407	5620	0.600237	1.78681e-14
407	6136	0.594499	3.64426e-14
408	162	0.509097	3.35932e-10
408	997	0.478316	5.06202e-09
408	10750	0.474402	7.01376e-09
408	80764	0.470342	9.79473e-09
409	5216	0.584326	1.24613e-13
409	27043	0.579925	2.09335e-13
409	26001	0.546744	8.24183e-12
409	10514	0.52631	6.52413e-11
410	6892	0.507302	3.96482e-10
410	9961	0.493662	1.35392e-09
410	84818	0.469398	1.0579e-08
410	25864	0.443603	7.95103e-08
411	79879	0.523591	8.50453e-11
411	79444	0.519937	1.2098e-10
411	8858	0.501309	6.84603e-10
411	6559	0.492363	1.51761e-09
412	6509	0.443615	7.9441e-08
412	5284	0.425775	2.91632e-07
412	3990	0.422395	3.70057e-07
412	4940	0.400371	1.64092e-06
414	54960	0.461307	2.02789e-08
414	80258	0.444579	7.38886e-08
414	11238	0.42947	2.24135e-07
414	8481	0.42875	2.35993e-07
415	53630	0.668206	1.14239e-18
415	51365	0.658635	5.17699e-18
415	6927	0.643481	5.07886e-17
415	6928	0.485923	2.65433e-09
416	6128	0.523564	8.52629e-11
416	29999	0.514478	2.03251e-10
416	9287	0.500968	7.06005e-10
416	43847	0.489156	2.0077e-09
417	4543	0.350675	3.26682e-05
417	1828	0.341207	5.47143e-05
417	56971	0.33732	6.72975e-05
417	2890	0.337119	6.80168e-05
419	50852	0.557324	2.66987e-12
419	6718	0.483624	3.23155e-09
419	9402	0.474859	6.75295e-09
419	1084	0.474844	6.76135e-09
420	348158	0.82783	6.05912e-35
420	2994	0.824606	1.84173e-34
420	8328	0.815927	3.29178e-33
420	932	0.814428	5.33292e-33
421	7625	0.480907	4.06996e-09
421	54507	0.465875	1.40734e-08
421	51586	0.457346	2.77174e-08
421	23762	0.44828	5.58391e-08
427	526	0.652533	1.31866e-17
427	51669	0.591181	5.46772e-14
427	7991	0.548705	6.70795e-12
427	5520	0.53833	1.9649e-11
429	51555	0.502242	6.2922e-10
429	5069	0.501003	7.03816e-10
429	486	0.489802	1.8981e-09
429	3641	0.481501	3.87069e-09
430	6939	0.410277	8.50861e-07
430	2161	0.407957	9.9419e-07
430	2905	0.394583	2.38524e-06
430	6261	0.392762	2.67929e-06
432	51762	0.416224	5.67744e-07
432	54361	0.400373	1.64066e-06
432	54360	0.385841	4.14137e-06
432	1138	0.380877	5.62587e-06
433	100528032	0.760754	1.50357e-26
433	6005	0.75747	3.28273e-26
433	10661	0.752076	1.15259e-25
433	910	0.717294	1.86185e-22
435	55954	0.474904	6.72778e-09
435	27342	0.444939	7.19118e-08
435	55695	0.421605	3.91067e-07
435	51024	0.415625	5.91561e-07
439	7001	0.702154	3.31514e-21
439	78992	0.681342	1.30768e-19
439	1725	0.65736	6.30485e-18
439	8677	0.65354	1.13181e-17
440	3475	0.444642	7.35399e-08
440	8896	0.423981	3.31028e-07
440	10282	0.396251	2.14296e-06
440	85865	0.37953	6.10797e-06
443	185	0.563741	1.32147e-12
443	8639	0.504255	5.24083e-10
443	79987	0.484	3.12966e-09
443	6359	0.477951	5.21917e-09
444	6917	0.517331	1.55159e-10
444	8439	0.443069	8.27592e-08
444	6386	0.442273	8.78335e-08
444	5167	0.416112	5.72128e-07
445	7490	0.562857	1.45716e-12
445	6337	0.5252	7.27204e-11
445	80142	0.506312	4.34242e-10
445	2934	0.494714	1.23391e-09
460	57795	0.672466	5.72597e-19
460	596	0.508405	3.58129e-10
460	60495	0.440379	1.01139e-07
460	4919	0.421628	3.90446e-07
462	181	0.424886	3.10577e-07
462	6906	0.416008	5.76235e-07
462	10691	0.410567	8.34357e-07
462	26154	0.410287	8.50256e-07
463	29123	0.668738	1.0485e-18
463	10725	0.629993	3.49011e-16
463	57610	0.559685	2.06471e-12
463	79068	0.558868	2.25744e-12
466	79657	0.639479	9.08719e-17
466	339175	0.588301	7.74728e-14
466	830	0.576565	3.09467e-13
466	7411	0.561935	1.61322e-12
467	3164	0.684357	7.82573e-20
467	7538	0.627395	5.00497e-16
467	1843	0.605947	8.66616e-15
467	3726	0.598631	2.18438e-14
468	54471	0.441166	9.53903e-08
468	89781	0.397605	1.96371e-06
468	182	0.387383	3.76173e-06
468	5155	0.383705	4.72785e-06
471	7520	0.582188	1.60486e-13
471	617	0.514157	2.09491e-10
471	51078	0.491607	1.62152e-09
471	55759	0.490861	1.73074e-09
472	22834	0.625524	6.47475e-16
472	841	0.563714	1.32545e-12
472	79784	0.541407	1.43409e-11
472	55718	0.532899	3.39909e-11
473	148479	0.536467	2.37395e-11
473	9927	0.53559	2.59394e-11
473	10277	0.478727	4.89065e-09
473	22883	0.45398	3.60329e-08
474	170680	0.40004	1.67668e-06
474	79748	0.399456	1.74162e-06
474	7932	0.397294	2.00359e-06
474	1081	0.386198	4.05028e-06
475	27089	0.666762	1.43998e-18
475	10011	0.619556	1.45556e-15
475	4695	0.619502	1.46602e-15
475	8697	0.577727	2.70474e-13
476	478	0.824975	1.62339e-34
476	51592	0.530102	4.49064e-11
476	23132	0.527508	5.80126e-11
476	28996	0.49604	1.09722e-09
477	8822	0.489644	1.92439e-09
477	60495	0.435702	1.42745e-07
477	7044	0.431981	1.87075e-07
477	460	0.419265	4.60263e-07
478	476	0.824975	1.62339e-34
478	7086	0.502944	5.90432e-10
478	51592	0.500958	7.0666e-10
478	1605	0.470051	1.00302e-08
479	2001	0.490408	1.80052e-09
479	59341	0.369837	1.09233e-05
479	23200	0.36217	1.70759e-05
479	376267	0.360531	1.87592e-05
481	10657	0.394369	2.41805e-06
481	476	0.366549	1.32484e-05
481	8085	0.362675	1.65868e-05
481	27018	0.354357	2.66099e-05
482	8822	0.563478	1.3605e-12
482	54857	0.440246	1.02139e-07
482	80125	0.438141	1.1934e-07
482	105	0.417851	5.0757e-07
483	9616	0.491655	1.61479e-09
483	55179	0.450777	4.61351e-08
483	58477	0.437166	1.28223e-07
483	51099	0.429957	2.16446e-07
486	3175	0.66152	3.30206e-18
486	337	0.648354	2.47161e-17
486	2693	0.648091	2.57053e-17
486	7448	0.646028	3.49096e-17
487	916	0.639912	8.53614e-17
487	3004	0.639654	8.86106e-17
487	8506	0.622152	1.02539e-15
487	2027	0.612925	3.50899e-15
488	11108	0.596397	2.88323e-14
488	89910	0.513799	2.1665e-10
488	9815	0.509651	3.19131e-10
488	6311	0.505064	4.86772e-10
489	11182	0.615415	2.5277e-15
489	5345	0.613835	3.11379e-15
489	10661	0.610406	4.87601e-15
489	23511	0.598997	2.08671e-14
490	84898	0.458481	2.53534e-08
490	2801	0.456012	3.07642e-08
490	79026	0.452791	3.9506e-08
490	4659	0.442612	8.56369e-08
491	1116	0.479604	4.54316e-09
491	1580	0.456274	3.0143e-08
491	3696	0.437598	1.24208e-07
491	1411	0.432068	1.85904e-07
492	5900	0.409454	8.99281e-07
492	778	0.400868	1.58849e-06
492	27019	0.385093	4.33839e-06
492	496	0.372309	9.43506e-06
493	9911	0.533683	3.14228e-11
493	2886	0.517896	1.47034e-10
493	9877	0.509175	3.33512e-10
493	9901	0.492454	1.50564e-09
495	2676	0.466224	1.36824e-08
495	2116	0.448053	5.68125e-08
495	5443	0.446974	6.16619e-08
495	79369	0.410557	8.34928e-07
496	11317	0.485297	2.80077e-09
496	51332	0.40563	1.16087e-06
496	51208	0.40558	1.16475e-06
496	6425	0.385886	4.12966e-06
498	4677	0.598323	2.26994e-14
498	4200	0.594987	3.43166e-14
498	10449	0.55203	4.71621e-12
498	506	0.541623	1.40256e-11
501	3308	0.525987	6.73365e-11
501	65983	0.476584	5.85072e-09
501	2107	0.437325	1.26729e-07
501	3295	0.432404	1.8144e-07
506	4720	0.60722	7.36089e-15
506	7326	0.597366	2.55694e-14
506	6390	0.572862	4.73631e-13
506	79657	0.572317	5.04056e-13
509	8872	0.706124	1.5858e-21
509	3422	0.673851	4.56266e-19
509	2665	0.663661	2.3573e-18
509	8802	0.628266	4.43676e-16
513	55009	0.704259	2.24585e-21
513	10025	0.672365	5.82052e-19
513	374291	0.629131	3.93506e-16
513	81926	0.611123	4.44151e-15
514	5688	0.603131	1.24051e-14
514	9217	0.515856	1.78444e-10
514	1522	0.498756	8.6122e-10
514	5770	0.496706	1.03412e-09
515	5686	0.645929	3.54245e-17
515	10286	0.626608	5.57871e-16
515	10542	0.619154	1.53611e-15
515	10935	0.58506	1.14198e-13
516	5245	0.682945	9.96168e-20
516	10476	0.542908	1.2284e-11
516	10237	0.539892	1.67523e-11
516	11267	0.511532	2.67897e-10
517	342538	0.576949	2.96026e-13
517	60314	0.576506	3.11572e-13
517	4666	0.570535	6.17239e-13
517	25875	0.536062	2.47309e-11
518	26003	0.606959	7.61163e-15
518	9125	0.505484	4.68461e-10
518	79568	0.502803	5.98042e-10
518	29789	0.500141	7.60588e-10
521	3954	0.611743	4.09615e-15
521	54872	0.593932	3.90714e-14
521	100126332	0.586848	9.22388e-14
521	4636	0.553068	4.22181e-12
522	54148	0.696718	8.9233e-21
522	539	0.608369	6.34793e-15
522	10694	0.560961	1.79545e-12
522	2551	0.534281	2.95933e-11
523	64422	0.715491	2.64963e-22
523	29083	0.610273	4.96071e-15
523	55032	0.570178	6.4269e-13
523	55347	0.564649	1.19484e-12
525	2352	0.508737	3.47316e-10
525	10232	0.501655	6.6354e-10
525	57553	0.485162	2.83349e-09
525	133522	0.481553	3.85338e-09
526	427	0.652533	1.31866e-17
526	9583	0.625328	6.65146e-16
526	29883	0.602562	1.33305e-14
526	5108	0.58522	1.12046e-13
527	7249	0.675583	3.42907e-19
527	65993	0.675558	3.44343e-19
527	115939	0.630923	3.06476e-16
527	9810	0.628618	4.22508e-16
528	6788	0.71091	6.41346e-22
528	51582	0.68816	4.05917e-20
528	9166	0.667054	1.37428e-18
528	92140	0.661666	3.22716e-18
529	27440	0.642994	5.45361e-17
529	4733	0.611589	4.17955e-15
529	85359	0.604724	1.01317e-14
529	7353	0.600982	1.62718e-14
533	27434	0.732897	7.81415e-24
533	1802	0.620596	1.26552e-15
533	112950	0.599796	1.88832e-14
533	10327	0.58477	1.18207e-13
534	23632	0.493952	1.3197e-09
534	5569	0.493492	1.37434e-09
534	6048	0.470213	9.89824e-09
534	11278	0.468806	1.11007e-08
535	23295	0.516904	1.61573e-10
535	10014	0.504416	5.1645e-10
535	57326	0.497121	9.9665e-10
535	10618	0.472713	8.06322e-09
537	8273	0.590183	6.17229e-14
537	10134	0.583879	1.31395e-13
537	60343	0.49697	1.01018e-09
537	6748	0.49562	1.13886e-09
538	51616	0.471346	9.02189e-09
538	546	0.458246	2.58268e-08
538	3476	0.432273	1.83175e-07
538	64860	0.432188	1.84302e-07
539	522	0.608369	6.34793e-15
539	9946	0.560632	1.86138e-12
539	29980	0.550108	5.78423e-12
539	6647	0.541891	1.36431e-11
540	55213	0.476164	6.05898e-09
540	64062	0.450086	4.86437e-08
540	4752	0.441122	9.5701e-08
540	29079	0.43452	1.55604e-07
545	8930	0.570267	6.36235e-13
545	80254	0.530388	4.36533e-11
545	6596	0.527097	6.04028e-11
545	56945	0.503563	5.58177e-10
546	51616	0.596245	2.93798e-14
546	51566	0.504841	4.96802e-10
546	22	0.499904	7.77e-10
546	158586	0.496299	1.07227e-09
547	23192	0.526934	6.13755e-11
547	10494	0.494012	1.31278e-09
547	10381	0.478195	5.11392e-09
547	790	0.464064	1.62769e-08
549	10558	0.585966	1.02502e-13
549	81689	0.570799	5.9902e-13
549	7743	0.487744	2.26894e-09
549	4686	0.475435	6.43788e-09
550	5499	0.619414	1.4835e-15
550	27429	0.587101	8.94853e-14
550	57175	0.520409	1.15616e-10
550	11313	0.516307	1.70987e-10
551	8484	0.893299	1.10819e-47
551	5309	0.889786	8.34873e-47
551	2902	0.875085	1.96636e-43
551	27023	0.87151	1.12106e-42
552	1071	0.455651	3.16436e-08
552	81831	0.368052	1.21329e-05
552	8671	0.360573	1.87146e-05
552	53820	0.3519	3.05216e-05
553	6143	0.460018	2.24594e-08
553	2319	0.452928	3.90899e-08
553	9349	0.441467	9.32753e-08
553	248	0.408207	9.7771e-07
554	2155	0.502626	6.07756e-10
554	3481	0.493783	1.33952e-09
554	2840	0.461776	1.95375e-08
554	5078	0.460491	2.16331e-08
558	4239	0.494387	1.27002e-09
558	1299	0.492469	1.50358e-09
558	4853	0.446215	6.5311e-08
558	3688	0.439928	1.04574e-07
563	4990	0.495445	1.15659e-09
563	336	0.480369	4.25927e-09
563	6005	0.477744	5.31067e-09
563	10861	0.477261	5.5292e-09
566	2249	0.714278	3.35419e-22
566	25861	0.686044	5.85545e-20
566	10661	0.628118	4.52859e-16
566	924	0.610635	4.73297e-15
567	9246	0.719259	1.26375e-22
567	5698	0.718166	1.56857e-22
567	3430	0.688427	3.87455e-20
567	3105	0.683452	9.13619e-20
570	10661	0.755302	5.45933e-26
570	10246	0.680043	1.6284e-19
570	5345	0.659801	4.31931e-18
570	51298	0.644726	4.23009e-17
572	6811	0.583009	1.45651e-13
572	23625	0.561731	1.64973e-12
572	741	0.560131	1.96643e-12
572	9158	0.558669	2.3067e-12
573	10210	0.507239	3.98773e-10
573	7016	0.501985	6.44073e-10
573	54840	0.488349	2.15321e-09
573	11238	0.462804	1.80018e-08
575	4804	0.498128	9.11045e-10
575	5600	0.411213	7.9876e-07
575	23237	0.408352	9.68293e-07
575	26038	0.371353	9.98654e-06
576	333	0.437869	1.21758e-07
576	6553	0.417204	5.30738e-07
576	6461	0.412505	7.31835e-07
576	9379	0.398079	1.9045e-06
577	8499	0.438162	1.19156e-07
577	4745	0.4229	3.57184e-07
577	83259	0.413507	6.83691e-07
577	11107	0.403658	1.32261e-06
578	10471	0.503805	5.45991e-10
578	55168	0.49414	1.29809e-09
578	9277	0.490786	1.74218e-09
578	6631	0.478732	4.88866e-09
579	9754	0.456747	2.9048e-08
579	2138	0.45466	3.41808e-08
579	9719	0.402476	1.42962e-06
579	1746	0.393684	2.52636e-06
580	1841	0.565461	1.0916e-12
580	8520	0.539427	1.75673e-11
580	7398	0.534228	2.97501e-11
580	6240	0.510193	3.03458e-10
581	5455	0.556437	2.93883e-12
581	401	0.540983	1.49794e-11
581	8484	0.537522	2.13309e-11
581	2812	0.53486	2.792e-11
582	124152	0.510199	3.03304e-10
582	9828	0.496716	1.03319e-09
582	10313	0.496414	1.06138e-09
582	10482	0.490825	1.7363e-09
585	83440	0.534864	2.79067e-11
585	26263	0.505069	4.8658e-10
585	8790	0.478137	5.1385e-09
585	10302	0.470974	9.30089e-09
586	10253	0.495349	1.16649e-09
586	2119	0.494331	1.2764e-09
586	10252	0.474797	6.78805e-09
586	81618	0.462783	1.80311e-08
587	10856	0.541457	1.42671e-11
587	2512	0.512692	2.40379e-10
587	5536	0.504566	5.09424e-10
587	79760	0.495415	1.15967e-09
590	11081	0.4684	1.14733e-08
590	4223	0.453748	3.66879e-08
590	55086	0.451047	4.51895e-08
590	5274	0.447434	5.95488e-08
593	56915	0.60347	1.18822e-14
593	64763	0.499772	7.86255e-10
593	2067	0.48777	2.26376e-09
593	10567	0.478313	5.06347e-09
594	25821	0.605656	8.99557e-15
594	55788	0.572306	5.04698e-13
594	55754	0.570298	6.34042e-13
594	26235	0.558179	2.43307e-12
595	4041	0.461767	1.95508e-08
595	8500	0.458534	2.52477e-08
595	390	0.427461	2.58728e-07
595	4091	0.412073	7.53586e-07
596	460	0.508405	3.58129e-10
596	3667	0.484921	2.89258e-09
596	3480	0.469975	1.00925e-08
596	1299	0.458521	2.52743e-08
597	962	0.678229	2.20799e-19
597	5552	0.659962	4.21231e-18
597	6354	0.647329	2.87889e-17
597	11025	0.62137	1.13994e-15
598	9371	0.446762	6.26615e-08
598	4661	0.432737	1.77123e-07
598	375790	0.417611	5.16055e-07
598	311	0.417364	5.24935e-07
599	8906	0.572437	4.97194e-13
599	55072	0.519643	1.24437e-10
599	5018	0.516914	1.61426e-10
599	5721	0.50712	4.03158e-10
602	4792	0.555745	3.16712e-12
602	5971	0.553702	3.94496e-12
602	1052	0.54385	1.11432e-11
602	8740	0.531279	3.99552e-11
604	4784	0.498602	8.73227e-10
604	23013	0.495801	1.12067e-09
604	6764	0.493635	1.35712e-09
604	8662	0.484838	2.91318e-09
605	60312	0.471754	8.72491e-09
605	7746	0.46092	2.09108e-08
605	9448	0.45714	2.81672e-08
605	51466	0.447875	5.75829e-08
607	23126	0.55308	4.21648e-12
607	81609	0.488465	2.13161e-09
607	79065	0.471695	8.76716e-09
607	9869	0.455754	3.13914e-08
608	54900	0.8123	1.05017e-32
608	270	0.789697	8.56512e-30
608	57823	0.767932	2.60953e-27
608	3887	0.746846	3.77794e-25
610	10021	0.957433	4.26453e-73
610	1815	0.956682	1.31903e-72
610	2906	0.93579	1.26923e-61
610	1339	0.925072	2.36724e-57
611	222487	0.7433	8.31368e-25
611	3697	0.728219	2.06885e-23
611	348158	0.723391	5.53402e-23
611	2994	0.723002	5.98533e-23
613	7625	0.626057	6.01807e-16
613	84164	0.598349	2.26249e-14
613	6598	0.56266	1.48928e-12
613	2130	0.5315	3.9083e-11
617	55054	0.539105	1.81557e-11
617	55139	0.52953	4.75232e-11
617	471	0.514157	2.09491e-10
617	3069	0.505914	4.50368e-10
622	9711	0.478435	5.0119e-09
622	10163	0.419626	4.48873e-07
622	5504	0.413803	6.70033e-07
622	8991	0.403571	1.33026e-06
623	624	0.528377	5.32537e-11
623	5054	0.486086	2.61732e-09
623	189	0.43634	1.36232e-07
623	2318	0.436179	1.37844e-07
624	623	0.528377	5.32537e-11
624	1289	0.464352	1.59057e-08
624	3872	0.436481	1.3483e-07
624	4320	0.423428	3.44175e-07
627	29113	0.469697	1.03236e-08
627	26033	0.460224	2.20957e-08
627	9630	0.418847	4.73797e-07
627	22943	0.412165	7.48947e-07
629	718	0.642118	6.19745e-17
629	717	0.628917	4.05364e-16
629	1356	0.621318	1.14802e-15
629	6590	0.591623	5.18176e-14
631	117247	0.492078	1.55611e-09
631	81831	0.45587	3.1108e-08
631	6629	0.439701	1.06349e-07
631	3642	0.432832	1.75904e-07
632	54850	0.539981	1.66009e-11
632	8666	0.452386	4.07605e-08
632	4209	0.450888	4.57416e-08
632	2193	0.44356	7.97693e-08
633	165	0.541815	1.37502e-11
633	25992	0.540102	1.63951e-11
633	1292	0.539197	1.79859e-11
633	3912	0.49501	1.202e-09
634	8638	0.445102	7.10339e-08
634	25984	0.443968	7.73627e-08
634	3107	0.43855	1.15795e-07
634	6398	0.431091	1.99486e-07
635	3375	0.359338	2.00819e-05
635	5928	0.345561	4.32503e-05
635	6932	0.340306	5.74201e-05
635	8708	0.327357	0.000112984
636	55196	0.677528	2.48231e-19
636	23247	0.444986	7.16582e-08
636	83450	0.426258	2.81832e-07
636	171017	0.42582	2.90708e-07
637	7353	0.503166	5.7868e-10
637	27440	0.486328	2.56343e-09
637	529	0.43242	1.81238e-07
637	5902	0.408146	9.81729e-07
638	706	0.593128	4.31197e-14
638	6590	0.482102	3.67818e-09
638	10045	0.469536	1.04606e-08
638	94025	0.455232	3.26947e-08
639	729230	0.511128	2.78175e-10
639	54900	0.507543	3.87758e-10
639	2124	0.502039	6.40933e-10
639	6504	0.496671	1.03732e-09
640	6693	0.517262	1.56171e-10
640	3242	0.514091	2.10783e-10
640	7454	0.509918	3.11315e-10
640	4066	0.509209	3.32466e-10
641	55215	0.803464	1.60103e-31
641	9055	0.765374	4.90628e-27
641	5428	0.761072	1.39325e-26
641	9493	0.632178	2.57043e-16
642	2535	0.527775	5.65094e-11
642	3720	0.517395	1.54216e-10
642	54619	0.481144	3.98915e-09
642	7159	0.480717	4.13604e-09
644	55744	0.562215	1.56411e-12
644	79020	0.519158	1.30343e-10
644	5683	0.463694	1.67654e-08
644	5236	0.457169	2.81045e-08
645	163131	0.607152	7.42552e-15
645	29946	0.590527	5.91963e-14
645	57731	0.471274	9.07487e-09
645	57716	0.431141	1.98772e-07
646	745	0.435425	1.45661e-07
646	10332	0.41054	8.35904e-07
646	23670	0.402116	1.46389e-06
646	4878	0.398257	1.88259e-06
649	55909	0.602102	1.4129e-14
649	10322	0.573836	4.23687e-13
649	29882	0.51621	1.72573e-10
649	100532736	0.514404	2.04664e-10
650	4635	0.490641	1.76433e-09
650	797	0.461249	2.03724e-08
650	5396	0.455301	3.25187e-08
650	22943	0.449068	5.25801e-08
651	11172	0.453804	3.65283e-08
651	7136	0.384459	4.51221e-06
651	186	0.37006	1.07804e-05
651	8715	0.367483	1.25447e-05
652	4093	0.539353	1.77012e-11
652	3399	0.526699	6.28072e-11
652	3397	0.468074	1.17811e-08
652	6461	0.458816	2.46939e-08
653	9421	0.525576	7.01011e-11
653	1641	0.497843	9.34521e-10
653	6300	0.49092	1.72188e-09
653	5077	0.480902	4.07174e-09
654	7010	0.445514	6.88647e-08
654	56245	0.432561	1.79394e-07
654	1288	0.415743	5.86825e-07
654	81567	0.411433	7.86975e-07
655	7849	0.45296	3.89939e-08
655	3975	0.448378	5.54216e-08
655	55890	0.424583	3.17284e-07
655	1004	0.421069	4.05996e-07
656	1815	0.77615	3.24796e-28
656	610	0.752746	9.87753e-26
656	2906	0.738455	2.3915e-24
656	10021	0.72519	3.84499e-23
657	9562	0.698437	6.54019e-21
657	51076	0.665511	1.75797e-18
657	1147	0.634402	1.87809e-16
657	23063	0.619174	1.53205e-15
658	5049	0.459736	2.29656e-08
658	79944	0.447122	6.09733e-08
658	79577	0.435526	1.44592e-07
658	38	0.422521	3.66791e-07
659	79137	0.573717	4.29529e-13
659	10152	0.565482	1.08913e-12
659	23677	0.483816	3.17902e-09
659	51719	0.467585	1.22577e-08
660	1136	0.394691	2.36878e-06
660	81578	0.393736	2.51794e-06
660	3043	0.393506	2.55524e-06
660	1780	0.371374	9.97408e-06
661	91782	0.672445	5.74487e-19
661	55909	0.645516	3.76542e-17
661	23484	0.637236	1.25441e-16
661	29883	0.619794	1.40975e-15
662	51128	0.563569	1.34694e-12
662	10744	0.561231	1.74311e-12
662	4695	0.536667	2.32637e-11
662	51121	0.531137	4.05239e-11
663	9101	0.570981	5.86752e-13
663	8669	0.555089	3.39905e-12
663	56986	0.544822	1.0073e-11
663	9318	0.507974	3.72678e-10
664	5163	0.668912	1.01961e-18
664	54583	0.664028	2.22434e-18
664	3939	0.625694	6.32511e-16
664	5223	0.616936	2.06588e-15
665	5520	0.641956	6.34589e-17
665	54793	0.567766	8.43542e-13
665	29883	0.54228	1.31066e-11
665	5516	0.535417	2.63942e-11
668	6770	0.867532	7.31938e-42
668	78989	0.83247	1.17384e-35
668	6943	0.768985	2.00808e-27
668	79825	0.768489	2.27228e-27
669	54927	0.525127	7.32413e-11
669	9601	0.463607	1.68833e-08
669	10282	0.452068	4.17741e-08
669	8674	0.451776	4.27244e-08
670	10667	0.62391	8.07427e-16
670	57128	0.619619	1.44322e-15
670	10799	0.53752	2.13353e-11
670	8899	0.522118	9.80789e-11
671	956	0.378686	6.42988e-06
671	7076	0.342846	5.01009e-05
671	5322	0.33871	6.2517e-05
671	4885	0.338152	6.4396e-05
672	79915	0.447107	6.10445e-08
672	60625	0.436095	1.387e-07
672	10230	0.42026	4.29518e-07
672	9735	0.418423	4.87897e-07
673	55131	0.593367	4.18737e-14
673	9690	0.480837	4.09434e-09
673	5594	0.453069	3.86675e-08
673	63933	0.449316	5.15971e-08
675	81624	0.510223	3.02624e-10
675	10721	0.501562	6.69192e-10
675	259266	0.464622	1.55652e-08
675	641	0.44899	5.28961e-08
676	57408	0.452483	4.04571e-08
676	5617	0.452407	4.06963e-08
676	51207	0.4449	7.21239e-08
676	5539	0.443592	7.95776e-08
677	91748	0.46727	1.25736e-08
677	23503	0.463188	1.74575e-08
677	400966	0.404079	1.28639e-06
677	22848	0.397481	1.97958e-06
678	54438	0.496374	1.06514e-09
678	23541	0.477047	5.62928e-09
678	28996	0.473035	7.85204e-09
678	27	0.467073	1.27758e-08
680	611	0.493931	1.32217e-09
680	486	0.488166	2.18766e-09
680	51298	0.482051	3.69437e-09
680	3697	0.478504	4.98309e-09
682	55643	0.568662	7.62663e-13
682	5442	0.557228	2.69793e-12
682	55658	0.546515	8.44208e-12
682	10025	0.540919	1.50786e-11
683	7367	0.462693	1.8161e-08
683	26234	0.443861	7.79838e-08
683	9364	0.414801	6.25905e-07
683	7366	0.414475	6.40011e-07
684	4938	0.57494	3.73246e-13
684	4599	0.568828	7.48592e-13
684	3437	0.549012	6.49419e-12
684	8519	0.524826	7.54191e-11
685	1672	0.493957	1.31914e-09
685	4086	0.442251	8.7975e-08
685	4258	0.434535	1.55431e-07
685	3732	0.433106	1.72451e-07
686	23609	0.591704	5.13055e-14
686	55831	0.532955	3.38007e-11
686	10533	0.516472	1.68342e-10
686	55207	0.488809	2.06915e-09
687	25976	0.386669	3.93319e-06
687	7763	0.374143	8.45702e-06
687	6867	0.364522	1.49068e-05
687	8812	0.356339	2.38048e-05
688	5493	0.589275	6.88837e-14
688	55765	0.570063	6.51082e-13
688	26018	0.50522	4.7992e-10
688	64062	0.499547	8.02293e-10
689	23107	0.66974	8.91979e-19
689	4869	0.643798	4.84815e-17
689	4437	0.624264	7.69384e-16
689	1022	0.609909	5.20094e-15
694	7334	0.569144	7.22348e-13
694	389898	0.514366	2.05408e-10
694	10988	0.511435	2.70344e-10
694	91298	0.508805	3.45129e-10
695	51411	0.821311	5.60442e-34
695	7805	0.793423	3.00544e-30
695	3071	0.792692	3.69703e-30
695	1536	0.789161	9.94024e-30
696	25861	0.47135	9.01868e-09
696	4308	0.467931	1.19184e-08
696	6906	0.46194	1.92835e-08
696	611	0.456899	2.87031e-08
699	891	0.757072	3.60528e-26
699	1033	0.727467	2.41475e-23
699	9833	0.726843	2.74459e-23
699	1058	0.725266	3.78603e-23
701	11339	0.722244	6.97083e-23
701	51203	0.720909	9.10371e-23
701	11065	0.700255	4.69662e-21
701	5888	0.694994	1.21594e-20
705	4201	0.762589	9.66521e-27
705	9477	0.736916	3.32956e-24
705	5528	0.688116	4.09013e-20
705	55168	0.66524	1.83554e-18
706	638	0.593128	4.31197e-14
706	6237	0.555224	3.34972e-12
706	6590	0.523006	8.99993e-11
706	3976	0.488813	2.06835e-09
708	51003	0.710565	6.85021e-22
708	79003	0.698135	6.90754e-21
708	3682	0.67643	2.97962e-19
708	51009	0.671748	6.43776e-19
710	4054	0.518977	1.32625e-10
710	51232	0.475868	6.21047e-09
710	4035	0.46716	1.26859e-08
710	9806	0.450385	4.75434e-08
712	713	0.857837	5.55505e-40
712	1436	0.827339	7.18801e-35
712	929	0.770182	1.48804e-27
712	7305	0.762047	1.10186e-26
713	712	0.857837	5.55505e-40
713	963	0.830429	2.43085e-35
713	9332	0.827369	7.11362e-35
713	929	0.818753	1.30931e-33
716	7132	0.552751	4.36709e-12
716	51279	0.542324	1.30475e-11
716	5266	0.5184	1.40136e-10
716	165	0.489652	1.92302e-09
717	629	0.628917	4.05364e-16
717	718	0.539609	1.72442e-11
717	80833	0.537706	2.09362e-11
717	2634	0.522125	9.80099e-11
718	629	0.642118	6.19745e-17
718	4837	0.556926	2.78753e-12
718	240	0.547708	7.44993e-12
718	8740	0.545082	9.80412e-12
719	963	0.866384	1.24382e-41
719	7805	0.861329	1.2129e-40
719	51284	0.846576	5.76773e-38
719	1536	0.841816	3.67551e-37
722	443	0.416874	5.42953e-07
722	10551	0.410802	8.21235e-07
722	51301	0.407057	1.05576e-06
722	960	0.400985	1.57636e-06
725	269	0.544599	1.03085e-11
725	2516	0.522892	9.10039e-11
725	2266	0.515543	1.83814e-10
725	9971	0.504071	5.32972e-10
726	10025	0.532363	3.58605e-11
726	22904	0.506956	4.09289e-10
726	57175	0.491941	1.57487e-09
726	23277	0.489748	1.90699e-09
727	79048	0.440905	9.72606e-08
727	2006	0.417601	5.16421e-07
727	27120	0.413247	6.95865e-07
727	117178	0.388468	3.51455e-06
728	11024	0.476246	6.01801e-09
728	2212	0.46677	1.30924e-08
728	64092	0.431608	1.92187e-07
728	27036	0.426967	2.67993e-07
729	23460	0.517744	1.4918e-10
729	114897	0.511712	2.6344e-10
729	26033	0.472204	8.40792e-09
729	56062	0.471843	8.66128e-09
730	78989	0.801156	3.18786e-31
730	6943	0.778223	1.89307e-28
730	79825	0.716317	2.25491e-22
730	6770	0.694762	1.26744e-20
731	1543	0.670199	8.28135e-19
731	8328	0.633828	2.03694e-16
731	3697	0.6315	2.82709e-16
731	2015	0.626543	5.62847e-16
732	2243	0.638565	1.03663e-16
732	23495	0.637204	1.26012e-16
732	9402	0.634823	1.76916e-16
732	10661	0.617217	1.98998e-15
733	3299	0.542959	1.22199e-11
733	27132	0.492406	1.5119e-09
733	1506	0.487139	2.39044e-09
733	3373	0.48213	3.66957e-09
734	8767	0.745144	5.52498e-25
734	4683	0.719739	1.14909e-22
734	55656	0.604108	1.09584e-14
734	528	0.588658	7.42124e-14
735	611	0.532258	3.6239e-11
735	4991	0.52897	5.02268e-11
735	1446	0.525883	6.80239e-11
735	6570	0.520151	1.1852e-10
738	4054	0.674433	4.14614e-19
738	3338	0.670382	8.03895e-19
738	83638	0.658183	5.55238e-18
738	5970	0.638306	1.07605e-16
740	6199	0.652314	1.36332e-17
740	55611	0.583049	1.44965e-13
740	5499	0.569286	7.10882e-13
740	741	0.531759	3.80879e-11
741	29901	0.717396	1.82493e-22
741	54663	0.619373	1.49177e-15
741	25855	0.592054	4.91622e-14
741	80194	0.590786	5.7368e-14
744	23635	0.437253	1.27403e-07
744	11174	0.387976	3.62465e-06
744	55251	0.35047	3.30404e-05
744	83988	0.342792	5.02486e-05
745	4485	0.569717	6.77113e-13
745	1608	0.52408	8.10995e-11
745	11012	0.512304	2.49259e-10
745	24146	0.464195	1.61072e-08
746	2197	0.553266	4.13327e-12
746	26521	0.467255	1.25891e-08
746	967	0.448751	5.38676e-08
746	2950	0.446832	6.23299e-08
747	5361	0.436752	1.32176e-07
747	29	0.420913	4.10428e-07
747	9718	0.418007	5.02142e-07
747	79158	0.410789	8.21957e-07
752	147912	0.510846	2.85581e-10
752	823	0.503129	5.80605e-10
752	256364	0.500699	7.23322e-10
752	10025	0.487977	2.22368e-09
753	8444	0.453585	3.71546e-08
753	3572	0.431854	1.88809e-07
753	3667	0.38784	3.65561e-06
753	55240	0.384849	4.40468e-06
754	7327	0.675984	3.20841e-19
754	4047	0.627497	4.93471e-16
754	3275	0.624339	7.61547e-16
754	56894	0.593494	4.12283e-14
755	8292	0.566162	1.0095e-12
755	25970	0.562458	1.52277e-12
755	23275	0.539575	1.73039e-11
755	8568	0.527783	5.64622e-11
757	25994	0.646712	3.15508e-17
757	10434	0.636325	1.42885e-16
757	54148	0.611707	4.11555e-15
757	9946	0.595232	3.32987e-14
759	2996	0.734452	5.62768e-24
759	8328	0.730421	1.31148e-23
759	5313	0.712822	4.44372e-22
759	420	0.712406	4.81407e-22
760	793	0.356624	2.34241e-05
760	51110	0.345954	4.23349e-05
760	8895	0.33639	7.0685e-05
760	1347	0.334061	7.98834e-05
761	5596	0.490052	1.85722e-09
761	5569	0.460249	2.20523e-08
761	5050	0.455893	3.10518e-08
761	6456	0.440852	9.76459e-08
762	64240	0.407644	1.0152e-06
762	4990	0.355267	2.52861e-05
762	1826	0.347225	3.94982e-05
762	1638	0.339423	6.01898e-05
763	869	0.491532	1.63221e-09
763	1412	0.446725	6.28376e-08
763	5648	0.444921	7.20138e-08
763	9032	0.439792	1.05638e-07
765	26239	0.42413	3.27573e-07
765	9228	0.407089	1.05352e-06
765	7046	0.397098	2.02922e-06
765	1671	0.388303	3.5511e-06
766	5313	0.53671	2.31619e-11
766	8993	0.52107	1.08505e-10
766	8328	0.488802	2.07034e-09
766	107	0.486448	2.53724e-09
767	51606	0.406224	1.11598e-06
767	26795	0.377687	6.83189e-06
767	5862	0.371104	1.01351e-05
767	201163	0.367667	1.24103e-05
768	5210	0.519836	1.22151e-10
768	11247	0.465158	1.49084e-08
768	56901	0.458239	2.58411e-08
768	9022	0.446633	6.32745e-08
770	1628	0.517196	1.57161e-10
770	6604	0.508838	3.44091e-10
770	11151	0.469571	1.04306e-08
770	57664	0.451267	4.44295e-08
771	53944	0.481569	3.84836e-09
771	56829	0.457881	2.65779e-08
771	10379	0.447223	6.05104e-08
771	4478	0.437577	1.24402e-07
773	8433	0.832446	1.18387e-35
773	774	0.804243	1.26607e-31
773	4762	0.803125	1.77241e-31
773	27023	0.795932	1.46672e-30
774	8433	0.854588	2.20736e-39
774	27158	0.807957	4.07858e-32
[truncated: 42,198 more rows]
