# Supplementary material for: An Ensemble Strategy to Predict Prognosis in Ovarian Cancer Based on Gene Modules
Source: Front Genet. 2019 Apr 24;10:366. doi: 10.3389/fgene.2019.00366 (PMC6491874; doi:10.3389/fgene.2019.00366)
Supplement: Supplementary file 4 [file Table_4.XLSX]

## Sheet: Sheet1
The filtered communities in Subtype_1
Community	Gene ID
1	2167, 3952, 125, 124, 1149, 9370
2	150786, 5870, 80227, 51287, 51642
3	6908, 5134, 51660, 5689, 387263
4	4496, 4495, 4499, 4502, 4501
5	6876, 59, 25802, 1264, 72
6	8935, 3204, 3201, 3199, 3200
7	64981, 84705, 79629, 25796, 55850
8	2947, 2948, 2946, 2949, 2944
9	56128, 56123, 56143, 56147, 9752, 57717, 56124, 56145, 56130
10	80233, 6448, 64118, 22994
11	356, 2999, 3824, 149628
12	6009, 51422, 9690, 10049
13	10069, 54093, 54148, 10694, 54014, 6651, 1859, 6526, 29104
14	1819, 79018, 10400, 91647
15	3336, 3329, 23451, 9330
16	9739, 79724, 9810, 2975
17	6637, 27247, 4190, 150684
18	5457, 59336, 2290, 6344
19	22822, 1848, 2119, 23531, 1604, 10253
20	29986, 54546, 27159, 3110, 6928
21	55664, 9933, 5991, 79956
22	387032, 10473, 346157, 9753
23	4239, 2006, 10234, 58494
24	57147, 63931, 11266, 8548, 22920, 27101, 25874
25	657, 64318, 439965, 9044, 2746, 2747, 23063
26	55893, 5516, 5108, 51312, 7486, 10671, 23484, 9639, 2055, 7976
27	6758, 26266, 727837, 8712, 6756, 9506
28	4867, 4291, 114327, 79858, 80258, 10324, 79659, 55259, 79989
29	79672, 56270, 10966
30	7019, 7570, 8505
31	29074, 404672, 6993
32	6799, 112869, 6817
33	3376, 10558, 10927
34	3205, 3206, 3202
35	8036, 64429, 1831, 9937, 11196
36	3231, 3233, 3232
37	6401, 6403, 2532
38	7098, 11199, 79370
39	54623, 5704, 2091
40	65263, 81858, 51337
41	1281, 1634, 10630
42	222658, 5603, 1432
43	8450, 10009, 55922, 10735, 57187
44	54542, 5742, 26190
45	7428, 25937, 7182
46	29080, 28977, 6636
47	5701, 55973, 60561
48	9179, 10467, 8896, 10552, 64598, 9551
49	57018, 56889, 7536, 55657, 6894, 27291, 84458, 29990, 54880
50	10670, 3301, 55234, 55958
