# Supplementary material for: An Ensemble Strategy to Predict Prognosis in Ovarian Cancer Based on Gene Modules
Source: Front Genet. 2019 Apr 24;10:366. doi: 10.3389/fgene.2019.00366 (PMC6491874; doi:10.3389/fgene.2019.00366)
Supplement: Supplementary file 5 [file Table_5.XLSX]

## Sheet: Sheet1
The filtered communities in Subtype_2
Community	Gene ID
1	5806, 2921, 6372, 2919, 6374, 2920, 3576
2	150786, 80227, 51642, 5870, 51287
3	55851, 55957, 79171, 1340, 5438
4	55848, 5991, 10171, 9933, 23538, 55664
5	10158, 7305, 712, 11326, 6035, 1436
6	6908, 10981, 5134, 5110, 8417, 9589, 387263, 5689, 51660
7	189, 1618, 2515, 57135, 63904
8	55666, 3607, 5034, 51547, 79415, 71, 6904, 9775, 64118, 2548
9	2947, 23451, 8611, 64921, 2949, 2948, 2946, 55086, 2944, 7072, 64395, 3329, 9330, 9689, 79589, 54677
10	4599, 3437, 3433, 64135, 4600, 24138
11	8773, 27101, 4706, 65988, 84516, 8031, 79728, 8801, 56061, 25874, 63931
12	5053, 10389, 8287, 2558, 1008
13	3824, 10663, 3458, 149628, 2999
14	6356, 83716, 1805, 4320, 50509, 4060, 1301, 8038, 4322, 176, 26585
15	58494, 2052, 1718, 633, 1038, 11167, 4239, 2006, 8406, 23641, 83468, 290
16	2979, 51312, 54762, 90665, 55909, 4054, 6907, 91782, 661, 339479, 357, 7180, 10321, 57804, 9920, 2352, 2348, 23039, 2039, 2153, 55657, 100129518, 11030, 9745, 5031, 10110, 6237, 7021, 2796, 7498, 91355, 10232, 2495, 50508, 8795, 80346, 25906, 3694, 56979, 325, 725, 7869, 5265, 9610, 51168, 22982, 83714, 28968, 722, 4485, 693216, 25763
17	835, 7984, 79571, 4289, 4850
