# Supplementary material for: An Ensemble Strategy to Predict Prognosis in Ovarian Cancer Based on Gene Modules
Source: Front Genet. 2019 Apr 24;10:366. doi: 10.3389/fgene.2019.00366 (PMC6491874; doi:10.3389/fgene.2019.00366)
Supplement: Supplementary file 6 [file Table_6.XLSX]

## Sheet: Sheet1
The filtered communities in Subtype_3
Community	Gene ID
1	5423, 51125, 81790, 55145, 7419, 2339, 10947
2	57717, 56128, 56123, 56125, 56124
3	5604, 51324, 8766, 10845, 81556
4	51287, 150786, 51642, 5870, 80227
5	10214, 280658, 6756, 6758, 727837
6	994, 4605, 6790, 11065, 22974
7	11247, 5210, 6676, 768, 56901
8	5902, 7353, 637, 27440, 529
9	8315, 51499, 11137, 51367, 1337, 55743, 51433, 10094, 387893, 56616
10	55341, 4026, 205564, 4976, 1739, 79572, 5504
11	79673, 27300, 57343, 7694
12	26747, 55425, 5994, 5983
13	5725, 55111, 5434, 6449
14	29088, 51606, 6917, 9821
15	55762, 79898, 80110, 9668
16	23483, 5095, 5911, 9375
17	5045, 100526783, 2242, 55898, 51335, 26276, 10519
18	3460, 3588, 3455, 3454
19	5163, 54583, 5706, 664, 30001, 10640, 79944, 55860, 10668, 23588, 5033, 3939
20	3431, 91543, 8638, 51191, 27074, 64135, 9830, 54809, 6772, 5610, 10346
21	10557, 22884, 10730, 23560, 9712, 22944, 10771
22	58487, 51400, 8898, 8726, 4863, 10714, 51501, 9702, 54851, 4361, 55863, 9789, 5547, 9440, 65084, 79053
23	26256, 114876, 8780, 29919, 5932
24	54472, 23410, 10522, 4928, 51272
25	57132, 9989, 9984, 5888, 51203, 7298, 11339, 701, 57045, 9097, 7525
26	51151, 2996, 26998, 6532
27	999, 6692, 2065, 5652
28	23741, 663, 9318, 56986
29	2305, 51512, 5347, 83461
30	55011, 51070, 11284, 11133
31	23608, 7988, 29803, 80853
32	51026, 5965, 60488, 55500
33	2068, 593, 79090, 2067
34	79073, 80789, 23193, 79080
35	23177, 10199, 4211, 54812
36	64112, 4140, 9529, 84193
37	25896, 9015, 25782, 375056, 25936, 26750, 51133, 7188, 90806, 9926
38	27243, 79177, 25799, 55663, 7515, 126299, 7593, 1954, 199731, 10155, 7766, 7711, 7638, 7769
39	5306, 5048, 7531, 79850, 64359, 51031
40	84859, 5062, 9711, 57110, 22916
41	100532726, 51773, 28971
42	55795, 10426, 3621
43	29948, 23046, 23511, 3177, 135
44	7405, 79731, 5058
45	3106, 3105, 3133
46	5879, 11014, 27102
47	5802, 2962, 4298, 9322, 9361
48	9513, 81565, 26168
49	9657, 11073, 55254, 79663, 114885
50	9146, 6199, 1468, 9123, 5499, 26502, 51547, 79415, 1453, 71, 22994, 55611, 740, 9144, 5833, 51181, 80233
51	1149, 7079, 9370
52	6789, 55861, 55661
53	55690, 54961, 5970
54	63904, 5375, 2993
55	1365, 6337, 83451
56	26284, 55731, 2319
57	79582, 9451, 51626, 25972, 7844
58	4704, 8798, 11331, 57102, 51202
59	10768, 23155, 6272
60	23152, 29888, 2931
61	2965, 22873, 79070, 5682, 2171, 120227, 26610
62	83480, 29087, 27034
63	7336, 23514, 5591
64	6355, 6354, 200315
65	4864, 6760, 6875
66	140460, 348110, 8800
67	3075, 10878, 1634
68	3821, 11126, 2559
69	2250, 27329, 6718
70	6271, 4684, 6284
71	6311, 11021, 10645
72	10352, 10905, 10885
73	9810, 23214, 4150
74	2328, 4604, 185
75	1522, 514, 5770
76	4923, 6663, 3697
77	10897, 10534, 100616403
78	10086, 779, 26784
79	56259, 25980, 60625
80	7737, 541578, 26071, 8269, 50814, 23641
81	8195, 6629, 51012, 8480, 5203, 79133
82	10606, 2926, 6731, 5471, 5431, 57050
83	165, 25992, 716, 51279, 1307, 7132
84	51439, 387032, 6882, 346157, 3841, 2968, 10672, 8859, 1192, 7718, 116150, 54901, 8899, 7746
85	9818, 26512, 64328, 51131, 81602, 29079, 11193, 26278, 23091
86	7289, 4055, 65125, 51147, 5893, 5777, 10233, 50813, 171017
87	10945, 55833, 6709, 7094, 29924, 83743, 4799, 53635, 81857, 23640, 56848, 5518
88	10866, 3107, 3134, 3135
89	10927, 79670, 23137, 7763
90	8045, 3611, 79751, 60626, 6888, 161, 23647, 64787, 81490, 6881
91	5771, 124583, 56905, 60490, 23580, 11057, 10928, 54982, 7050, 79959, 57332, 30850, 2885, 5433, 9218
92	8819, 22976, 22861, 56683, 23165, 7216, 3148, 9875, 2146, 7074, 6647, 51631, 10916, 115201, 1827, 539, 57826, 1831, 4853, 1299, 10142, 55112, 558
