# Supplementary material for: An Ensemble Strategy to Predict Prognosis in Ovarian Cancer Based on Gene Modules
Source: Front Genet. 2019 Apr 24;10:366. doi: 10.3389/fgene.2019.00366 (PMC6491874; doi:10.3389/fgene.2019.00366)
Supplement: Supplementary file 7 [file Table_7.XLSX]

## Sheet: Sheet1
Functional annotation of the first subtype
Community	BP	P-value
1	GO_ETHANOL_METABOLIC_PROCESS	5.17e-07
4	GO_POSITIVE_REGULATION_OF_PROTEOLYSIS	0.000186
9	GO_GLUTATHIONE_DERIVATIVE_METABOLIC_PR_PROCESS	9.52e-11
