# Supplementary material for: An Ensemble Strategy to Predict Prognosis in Ovarian Cancer Based on Gene Modules
Source: Front Genet. 2019 Apr 24;10:366. doi: 10.3389/fgene.2019.00366 (PMC6491874; doi:10.3389/fgene.2019.00366)
Supplement: Supplementary file 8 [file Table_8.XLSX]

## Sheet: Sheet1
Functional annotation of the second subtype
Community	BP	P-value
1	GO_DNA_METABOLIC_PROCESS	0.000235
3	GO_RESPONSE_TO_STEROID_HORMONE	0.000117
4	GO_RESPONSE_TO_ENDOGENOUS_STIMULUS	6.11e-14
5	GO_RESPONSE_TO_TOPOLOGICALLY_INCORRECTECT_PROTEIN	8.69e-07
10	GO_RESPONSE_TO_FATTY_ACID	5.39e-06
