# Supplementary material for: An Ensemble Strategy to Predict Prognosis in Ovarian Cancer Based on Gene Modules
Source: Front Genet. 2019 Apr 24;10:366. doi: 10.3389/fgene.2019.00366 (PMC6491874; doi:10.3389/fgene.2019.00366)
Supplement: Supplementary file 9 [file Table_9.XLSX]

## Sheet: Sheet1
Functional annotation of the third subtype
Community	BP	P-value
6	GO_PROTEIN_LOCALIZATION_TO_CENTROSOME	1.35e-05
10	GO_CELL_CYCLE_PROCESS	8.31e-07
